# Supplementary material for: Assessment of Molecular Subtypes in Thyrotoxic Periodic Paralysis and Graves Disease Among Chinese Han Adults: A Population-Based Genome-Wide Association Study
Source: PubMed Central journal article supplement (PMC6503496; doi:10.1001/jamanetworkopen.2019.3348), 2019-05-03
Supplement: jamanetwopen-2-e193348-s001.pdf [file jamanetwopen-2-e193348-s001.pdf]

## Supplementary Online Content

Zhao S-X, Liu W, Liang, J, et al; China Consortium for the Genetics of Autoimmune Thyroid Disease. Assessment of molecular subtypes in thyrotoxic periodic paralysis and Graves disease among Chinese Han adults: a population-based genome-wide association study. *JAMA Netw Open*. 2019;2(5):e193348. doi:10.1001/jamanetworkopen.2019.3348

### **eAppendix.** Supplementary Material

#### **eReferences**

**eTable 1.** A Total of 100 SNPs Selected for the Replication Stage Study

**eTable 2.** Association Results With TPP in the Initial Genome-Wide Scan, the Replication Stage Analysis and the Combined Populations for the 100 SNPs

**eTable 3.** Association Results With TPP in the Initial Genome-Wide Scan and the Second-Stage Analysis for the 34 GD Risk SNPs

**eTable 4.** Clinical and Laboratory Features of 537 TPP Patients

**eTable 5.** TPP Association Results for the Imputed and Typed SNPs in the 4q31.3 Region in the Initial Genome-Wide Scan

**eTable 6.** TPP Association Results for the Imputed and Typed SNPs in the 11q14.1 Region in the Initial Genome-Wide Scan

**eTable 7.** TPP Association Results for the Imputed and Typed SNPs in the 17q24.3 Region in the Initial Genome-Wide Scan

**eTable 8.** Logistic Regression Analysis for SNPs in the Two Regions Associated With TPP in the Combined Population

**eTable 9.** The Association of Each Prediction Model With TPP in Total GD Participants

**eTable 10.** Primers of Three TPP Candidate Genes and for Real-Time Reverse Transcription PCR

**eFigure 1.** The Flowchart for Quality Filtering in the Two-Stage Study for Genome-Wide Association Study

**eFigure 2.** Summary of Association Results From the Genome-Wide Scan

**eFigure 3.** Plots of Principal Component Analysis (PCA) and Multidimensional Scaling (MDS) Analysis in Our Cohorts and the HapMap Samples

**eFigure 4.** Quantile-Quantile Plot for Detection of Population Stratification

**eFigure 5.** The Flowchart for SNPs Selection of the Second Stage Study

**eFigure 6.** The Logistic Regression Results and Linkage Disequilibrium Block Analysis at 4q31.3

**eFigure 7.** The Cis-eQTL Analyses Results at 11q14.1

**eFigure 8.** The Logistic Regression Results at 17q24.3

**eFigure 9.** Cis-eQTL Analysis and Transcript Abundances of KCNJ2 at 17q24.3

This supplementary material has been provided by the authors to give readers additional information about their work.

## **eAppendix. Supplementary Material**

### **The characters of study participants**

A total of 537 patients with TPP, 1,519 patients with GD having no history of TPP, and 3,249 healthy participants were recruited from Chinese Han population through collaboration with the hospitals in China (Table 1). All samples were obtained under local institutional review board approval and with documented informed consent. All the cases were sporadic. We collected 5-ml blood samples from each participant for DNA preparation and biochemical measurements.

TPP was diagnosed in patients with episodic flaccid paralysis, serum potassium concentration less than 3.5 mmol/liter (normal concentration, 3.5–5.0 mmol/liter) during at least one of the attacks, and thyrotoxicosis. Diagnosis with GD was based on documented clinical and biochemical evidence of hyperthyroidism, diffuse goiter, and the presence of at least one of the following clinical characters: positive thyroid-stimulating hormone receptor antibody (TRAb) tests, exophthalmos, or pretibial myxedema.<sup>1-5</sup> All individuals classified as having TPP or GD were interviewed and examined by the experienced clinicians.

Control participants were over 35 years old. Given that TPP, GD, and other autoimmune thyroid disease have preponderance in the young female population, this age criteria could reduce the number of controls who might develop GD later. For excluding clinical or subclinical autoimmune thyroid disease, the levels of sensitive TSH and TPOAb in control participants were measured using chemiluminescence immunoassay in our laboratory.<sup>1,2</sup>

## GWAS genotyping and initial quality control

DNA samples from 158 TPP cases and 803 controls were genotyped using Illumina HumanOmniZhonghua-8 BeadChips (called TPP GWAS section). And DNA samples from 17 GD cases with TPP, 1,519 GD cases without TPP, and 1,516 controls were genotyped using Illumina Human660-Quad BeadChips as described previously (called GD GWAS section).<sup>1,2</sup> Quality filtering was separately performed on SNPs and samples before analysis to ensure robust association tests for the two above-mentioned sections (eFigure 1 in the Supplement). Cryptic relationships between genotyped individuals were measured utilizing pairwise identity-by-descent estimation by PLINK software.<sup>6</sup>

Of the 900,015 markers assayed in the TPP GWAS section, 4,410 that were from the Y or mitochondrial chromosomes or were copy number variant related and Illumina controls were excluded. Next, 16,984 markers with genotype call rates below 98%, or with a minor allele frequency (MAF) less than 0.01, or with significant deviation from Hardy-Weinberg equilibrium in the controls ( $P < 10^{-6}$ ) or in cases ( $P < 10^{-10}$ ) were discarded, leaving 883,031 SNPs for subsequent analysis. After removing 106 samples with low call rates ( $< 98\%$ ,  $n = 18$ ), gender inconsistencies ( $n = 3$ ), and cryptic relatedness ( $n = 81$ ), 855 samples were available for further association analysis (eFigure 1 in the Supplement). Meanwhile, out of the 655,214 markers assayed in the GD GWAS section, 3,185 that were from the Y or mitochondrial chromosomes or were copy number variant related and Illumina controls were removed. Next, 107,867 markers with a genotype call rate below 98%, or with MAF less than 0.01, or with significant deviation from Hardy-Weinberg equilibrium in the controls ( $P < 10^{-6}$ ), were discarded, leaving 547,347 SNPs for the following analysis. After removing 172 samples with low call rates ( $< 98\%$ ,  $n = 18$ ), gender inconsistencies ( $n = 3$ ), and cryptic relatedness ( $n = 81$ ), 2,880 samples were available for further association analysis (eFigure 1 in the Supplement).

## Evaluation of population structure and Quantile-quantile plots

To evaluate the population structure in samples, principal component analysis (PCA) and multidimensional scaling (MDS) analysis using a subset of pruned and unlinked markers were performed by SmartPCA (one of the program modules in the EIGENSOFT software package)<sup>7</sup> and PLINK<sup>6</sup>, respectively. For the PCA, our samples and the HapMap samples were plotted using the first two eigenvectors produced by smartPCA (eFigure 2A in the Supplement). For MDS analysis, dimensions were calculated based on the IBD pairwise distance among all individuals in both our cohort and the HapMap participants using PLINK.<sup>6</sup> The first two dimensions of the result were plotted (eFigure 2B in the Supplement). SmartPCA was also used to identify potential genetic outliers. The top ten principal components were computed using HapMap populations followed by projection of current cohort participants onto those principal components, and then run the outlier removal ( $\sigma$  threshold =6 with five iterations). Finally, all participants for the association analysis were restricted to Chinese Han Populations ancestry.

The distribution of observed P values (on the  $-\log_{10}$  scale) of given SNPs were plotted against the theoretical distribution of expected P values to construct quantile-quantile plots. To account for relatedness and stratification within our TPP cases and healthy control sample sets, we calculated the genomic control inflation factor ( $\lambda$ ) by dividing median  $\chi^2$  statistics by 0.4563 based on chip markers. The calculations and the plots were done using PLINK and R statistics packages (eFigure 3 in the Supplement).

## Imputation and statistical analysis in the discovery stage

The genotype imputation for the GD GWAS section has been carried out as described previously.<sup>1,2</sup> And genotype imputation for the TPP GWAS section was also performed using IMPUTE2 software<sup>8</sup> in the 158 TPP cases and 803 controls. The 1000G phase 1 integrated variant set (Mar 2012) were also used as a reference. For the imputed SNPs, we first removed the indels and SNPs with a relatively low confidence (estimated probability  $\leq 0.9$ ). Then the total of 33,676,913 SNPs with genotype call rates below 98%, or with MAF less than 0.01, or with significant deviation from Hardy-Weinberg equilibrium in the controls ( $P < 10^{-6}$ ) or in cases ( $P < 10^{-10}$ ), were excluded.

Finally, the association analysis for 2,752,055 SNPs among the 171 GD cases with TPP, 1,404 GD cases without TPP, and 2,160 healthy controls were carried out using the SNPTEST v2 software (Frequentist Association Tests with score method).<sup>9</sup>

For the 2,692,307 autosomal SNPs in 171 GD cases with TPP and 2,160 controls, or 1,404 GD cases without TPP, and 2,160 healthy controls, we also carried out the association analysis using the Cochran-Armitage trend test in PLINK,<sup>6</sup> respectively. Whereas, we analyzed 59,748 SNPs located in X chromosome using the logistic regression in PLINK according to the following principles: for alleles A and a, males were coded A to 0 and a to 2, and females were coded AA to 0, Aa to 1, and aa to 2, and additionally sex (male =0, female =1) was also automatically included as a covariate.<sup>6</sup>

Genome-wide P-value and regional plots were generated using R software (LocusZoom) or SNAP, version 2.2 software.<sup>10,11</sup>

### **SNPs selection for the second stage study**

Among 2,752,055 SNPs in the discovery stage, there are 1,731 autosomal SNPs with discovery stage  $P < 0.0001$  and the P value between patients with TPP and patients with GD having no history of TPP less than 0.05. Firstly, we defined the chromosomal regions based on HapMap recombination rates (the recombination rate more than 30 cM/Mb) and found 1,731 SNPs with discovery stage  $P < 0.0001$  located in 163 chromosomal regions. Next, we performed the forward logistic regression analysis using SNPs with the discovery stage  $P < 0.01$  to identify the potential causal SNPs using R package. Then, we performed the sample size analysis and further selected 104 SNPs which can meet the genome-wide association significance level ( $P \leq 5 \times 10^{-8}$ ) within the samples size of TPP cases less than 1,000. Also, we exclude 3 SNPs without significant difference for the MAF between 171 GD cases with TPP and 1,404 GD cases without TPP. Given the association of 17q24.3 locus with TPP has been reported in the previous paper, a total of 12 tagSNPs at 17q24.3 (including rs312691) were also selected and genotyped in the second stage study (eTable 2 in the Supplement). Unfortunately, the probe of rs79449227 at

chromosome 6 was not synthesized successfully. Finally, a total of 100 TPP possible candidate SNPs which located within 71 chromosomal regions were selected to be genotyped in the second cohort (362 Patients with TPP and 1,089 sex-matched controls), utilizing TaqMan® SNP Genotyping Assays on the Fluidigm EP1 platform for the second stage study (eTable 3 and eFigure 9 in the Supplement). Also, we genotyped the 100 selected TPP candidate SNPs in the GWAS samples to increase the statistical power.

Meanwhile, we further chose and genotyped 34 SNPs, which were associated with the susceptibility of GD in Chinese Han population and located in 22 chromosomal regions, in the replication stage using the Applied Biosystems 7900HT Fast Real Time PCR System (eTable 4 in the Supplement).

### **Association analyses in replication and combined populations**

For autosomal SNPs, we used the Cochran-Armitage trend test in the replication stage and the Cochran-Mantel-Haenszel stratification analysis in combined samples.<sup>6</sup> The difference among the studies was examined using the Breslow-Day test.<sup>6</sup> Conditional logistic regression analysis was used to examine independent effects of individual SNPs using R statistics packages.

### **Power calculations**

Power calculations were performed using QUANTO (version 1.2.4). Based on our GWAS data, we found that the minimum of 125 (rs9292371) and the maximum of 964 (rs2109051) samples with TPP would be needed with a disease prevalence of 0.01%, and for the significant difference of these 100 selected SNPs at a genome-wide significance level for each variant with risk allele frequencies ranging from 0.02 to 0.91. However, when the 100 selected TPP candidate SNPs were genotyped in approximately 362 Patients with GD and 1,089 controls, we further calculated the total sample sizes needed in the following study according to the discovery and the second replication cohorts. The data showed that the sample pairs needed for the SNPs with replication  $P \leq 0.05$  and

combined  $P \leq 0.0005$  (the Bonferroni-corrected significance level) ranged from 196 to 1,531 (eTable 2 in the Supplement). Among the 34 GD risk SNPs, we also calculated the sample sizes needed according to the combined populations (eTable 3 in the Supplement).

### **Cis-eQTL analysis**

As for the cis-eQTL analysis, we inspected the following eQTL databases. One was the cell type-specific eQTLs relevant to immunity and inflammation in paired samples of primary monocytes and B cells, purified by positive selection directly from 283 healthy individuals.<sup>12</sup> The second database was the Genotype-Tissue Expression (GTEx) project (<https://gtexportal.org/home/>) providing valuable insights into the mechanisms of gene regulation by studying human gene expression and regulation in multiple tissues from health individuals. The third database was developed by Fairfax et al. and contained primary CD14<sup>+</sup> human monocytes from 432 European volunteers to the inflammatory proxies interferon- $\gamma$  (IFN- $\gamma$ ) or differing durations (2 or 24 hours) of lipopolysaccharide (LPS) to assess the effect of innate immune stimuli on eQTLs.<sup>13</sup> The fourth database was from Lee et al. and derived dendritic cells from peripheral blood monocytes of healthy individuals (295 Caucasians, 122 African Americans, 117 East Asians) and stimulated them with LPS, influenza virus, or the cytokine IFN- $\gamma$  to assess natural genetic variants that underlie variation in the host innate immune response to infection.<sup>14</sup> The fifth cis-eQTL database was from Rai T et al. and derived purified CD4<sup>+</sup> T cells and monocytes, representing adaptive and innate immunity, in a multi-ethnic cohort of 461 healthy individuals including 112 African Americans, 213 European Americans, and 82 East Asian Americans.<sup>15</sup>

### **Real-Time PCR**

Blood samples (10 ml) were collected from 258 unrelated healthy Chinese Han volunteers and for gene expression analysis in peripheral blood mononuclear cells (PBMCs). Samples with more blood volume (100 ml) were

donated by 25 individuals from the same group for gene expression assay in distinct subpopulations of PBMCs. The CD4+, CD8+, CD14+ and CD19+ subsets of PBMCs were isolated using MACS Column kits (Miltenyi Biotec) according to the manufacturer's instructions. The purity of each cell subpopulation was determined by an LSR II Flow Cytometer (BD Biosciences), and the cell subpopulations with a purity of over 90% were used for real time RT-PCR. Real time quantitative reverse transcription PCRs (RT-PCRs) for a series of genes or transcript units were performed in duplicate using the SYBR Green and ABI 7900HT Fast Real-Time PCR System. Expression levels in all samples were normalized to the relative expression level of GAPDH. Primers used for the amplifications were shown in Table S8. We performed statistical analysis of expression data using ANOVA and an unpaired Student's t-test (the two-tail P-value was indicated on the figures). The genotypes of the SNPs were determined using the ABI 7900HT Fast Real-Time PCR System.

### **Sequencing of two TPP susceptibility genes and gene level association analysis**

To further evaluate the association of two TPP susceptibility genes (*DCHS2* and *KCNJ2*) and a novel long intergenic noncoding RNA (lincRNA, CTD-2378E21.1) with TPP, we first amplified and sequenced the exonic regions of three TPP genes in 34 patients with TPP and 102 healthy controls using PCR and Sanger sequencing and the primers were provided in the online eTable 10 in the Supplement. Next, we compared the frequency difference of rare nonsynonymous variants ( $MAF \leq 1\%$ ), based on 1000 Genomes East Asian (EAS), ESP6500, ExAc EAS, dbSNP 139 and our inhouse database et al, in the three genes using Fisher's method to combine burden test.

### **The prediction models**

We constructed the prediction model using the weighted genetic risk score (wGRS)<sup>16</sup> and two different markers. Firstly, three independent TPP specific SNPs (rs1352714, rs2186564, and rs312691) in three chromosomal loci



were used as the markers to construct the wGRS model. Then, a total of 11 independent SNPs in eight chromosomal loci with  $P_{\text{replication}} < 0.05$ , with  $P_{\text{combined}} < 0.0005$  (Bonferroni-corrected significance in combined populations), and with  $P_{\text{TPPvsGD}} < 0.05$ , were used as the markers to construct the wGRS model. As for the wGRS model, a weighted score was calculated by multiplying each participant's allele score (0, 1, 2) by the SNP's relative effect size (the natural log of OR in our study) obtained from our association study. Then, the value of the weighted score was rescaled by dividing all values by the sum of the effect sizes and then multiplying by the total number of SNPs, thus obtaining the final weighted GRS.<sup>16</sup> Next, logistic regression was used to calculate the OR and P values for each wGRS and gender as a covariant. Subsequently, we generated the receiver operator characteristic (ROC) curves and calculated the area under the curve (AUC), the sensitivity and specificity of each model to determine how well the models discriminates between TPP cases and Patients with GD without TPP. Finally, we categorized the risk scores as four different groups according to the mean wGRS and S.D.: group one, wGRS less than the mean; group two, wGRS between the mean and the mean + 1 S.D.; group three, wGRS from the mean + 1 S.D. to the mean + 2 S.D.; group four, wGRS greater than the mean + 2 S.D. P values, OR and 95% confidence intervals were evaluated using group 1 as the reference (eTable 9 in the Supplement).

## Web resources

Software and Web resources utilized in the study are provided below:

PLINK v1.07, <http://pngu.mgh.harvard.edu/~purcell/plink/>

R statistical environment version 2.10.0, <http://www.r-project.org/>

LocusZoom version 1.1, <http://locuszoom.sph.umich.edu/locuszoom/>

SNAP version 2.2, <http://www.broadinstitute.org/mpg/snap/ldsearch.php/>

IMPUTE2, [http://mathgen.stats.ox.ac.uk/impute/impute\\_v2.html/](http://mathgen.stats.ox.ac.uk/impute/impute_v2.html/)

SNPTEST v2 software, [https://mathgen.stats.ox.ac.uk/genetics\\_software/snptest/snptest.html/](https://mathgen.stats.ox.ac.uk/genetics_software/snptest/snptest.html/)

GWAS database, <http://jjwanglab.org/gwasdb>

QUANTO version 1.2.4, <http://biostats.usc.edu/Quanto.html>

GTEEx Portal V6P, <https://gtexportal.org/home/>

## References

1. Chu X, Pan CM, Zhao SX, et al. A genome-wide association study identifies two new risk loci for Graves' disease. *Nat Genet* 2011;43(9):897-901.
2. Zhao SX, Xue LQ, Liu W, et al. Robust evidence for five new Graves' disease risk loci from a staged genome-wide association analysis. *Hum Mol Genet* 2013;22(16):3347-3362.
3. Zhao SX, Pan CM, Cao HM, et al. Association of the CTLA4 gene with Graves' disease in the Chinese Han population. *PLoS One* 2010;5(3):e9821.
4. Zhao SX, Liu W, Zhan M, et al. A refined study of FCRL genes from a genome-wide association study for Graves' disease. *PLoS One* 2013;8(3):e57758.
5. Song HD, Liang J, Shi JY, et al. Functional SNPs in the SCGB3A2 promoter are associated with susceptibility to Graves' disease. *Hum Mol Genet* 2009;18(6):1156-1170.
6. Purcell S, Neale B, Todd-Brown K, et al. PLINK: a tool set for whole-genome association and population-based linkage analyses. *Am J Hum Genet* 2007;81(3):559-575.
7. Price AL, Patterson NJ, Plenge RM, Weinblatt ME, Shadick NA, Reich D. Principal components analysis corrects for stratification in genome-wide association studies. *Nat Genet* 2006;38(8):904-909.
8. Howie BN, Donnelly P, Marchini J. A flexible and accurate genotype imputation method for the next generation of genome-wide association studies. *PLoS Genet* 2009;5(6):e1000529.
9. Marchini J, Howie B, Myers S, McVean G, Donnelly P. A new multipoint method for genome-wide association studies by imputation of genotypes. *Nat Genet* 2007;39(7):906-913.
10. Pruim RJ, Welch RP, Sanna S, et al. LocusZoom: regional visualization of genome-wide association scan results. *Bioinformatics* 2010;26(18):2336-2337.
11. Johnson AD, Handsaker RE, Pulit SL, Nizzari MM, O'Donnell CJ, de Bakker PI. SNAP: a web-based tool for identification

and annotation of proxy SNPs using HapMap. *Bioinformatics* 2008;24(24):2938-2939.

12. Westra HJ, Peters MJ, Esko T, et al. Systematic identification of trans eQTLs as putative drivers of known disease associations. *Nat Genet* 2013;45(10):1238-1243.
13. Fairfax BP, Humburg P, Makino S, et al. Innate immune activity conditions the effect of regulatory variants upon monocyte gene expression. *Science* 2014;343(6175):1246949.
14. Lee MN, Ye C, Villani AC, et al. Common genetic variants modulate pathogen-sensing responses in human dendritic cells. *Science* 2014;343(6175):1246980.
15. Raj T, Rothamel K, Mostafavi S, et al. Polarization of the effects of autoimmune and neurodegenerative risk alleles in leukocytes. *Science* 2014;344(6183):519-523.
16. Qi Q, Chu AY, Kang JH, et al. Sugar-sweetened beverages and genetic risk of obesity. *N Engl J Med* 2012;367(15):1387-1396.

**eTable 1. A total of 100 SNPs selected for the replication stage study**

| Region No. | Chr. | Independent SNP | BP        | TPPvsControl (175 vs 2,160) |      |             | TPPvsGD (175 vs 1,404) |      |
|------------|------|-----------------|-----------|-----------------------------|------|-------------|------------------------|------|
|            |      |                 |           | P-value                     | OR   | Sample Size | P-value                | OR   |
| 1          | 1    | rs6667605       | 2502780   | $2.18 \times 10^{-5}$       | 1.63 | 352         | 0.0035                 | 1.41 |
| 3          | 1    | rs16831558      | 44502163  | $2.41 \times 10^{-5}$       | 1.62 | 282         | 0.0010                 | 1.46 |
| 3          | 1    | rs1007795       | 44517409  | $6.12 \times 10^{-5}$       | 1.60 | 426         | 0.0014                 | 1.47 |
| 4          | 1    | rs1146530       | 96492489  | $2.76 \times 10^{-5}$       | 1.99 | 369         | 0.0011                 | 1.76 |
| 4          | 1    | rs1144303       | 96496298  | $4.01 \times 10^{-5}$       | 1.79 | 429         | 0.0005                 | 1.67 |
| 5          | 1    | rs539799        | 120208472 | 0.0025                      | 1.57 | 373         | 0.0115                 | 1.47 |
| 8          | 1    | rs4271175       | 182446188 | $3.36 \times 10^{-5}$       | 1.91 | 236         | 0.0014                 | 1.68 |
| 9          | 1    | rs7529077       | 205561372 | $5.86 \times 10^{-5}$       | 2.87 | 165         | 0.0009                 | 2.47 |
| 10         | 1    | rs12038605      | 234036134 | 0.0015                      | 1.70 | 674         | 0.0592                 | 1.39 |
| 11         | 2    | rs13400534      | 1411883   | 0.0001                      | 1.60 | 457         | 0.0075                 | 1.41 |
| 13         | 2    | rs10176331      | 129435535 | 0.0029                      | 1.41 | 387         | 0.0818                 | 1.23 |
| 14         | 2    | rs6751710       | 168975305 | $3.75 \times 10^{-5}$       | 1.64 | 440         | 0.0002                 | 1.56 |
| 16         | 3    | rs6806226       | 3660691   | 0.0005                      | 1.65 | 616         | 0.0189                 | 1.42 |
| 17         | 3    | rs16835753      | 124349120 | 0.0025                      | 1.40 | 594         | 0.0138                 | 1.32 |
| 19         | 4    | rs10026043      | 21407094  | 0.0010                      | 2.33 | 834         | 0.0043                 | 2.09 |
| 21         | 4    | rs10022828      | 40855358  | $2.19 \times 10^{-6}$       | 3.04 | 163         | 0.0015                 | 2.24 |
| 22         | 4    | rs28692179      | 84763256  | 0.0002                      | 1.53 | 377         | 0.0002                 | 1.54 |
| 23         | 4    | rs12511622      | 124615184 | 0.0036                      | 1.39 | 571         | 0.0098                 | 1.35 |
| 25         | 4    | rs1352714       | 155243604 | $3.69 \times 10^{-5}$       | 1.74 | 320         | $8.38 \times 10^{-5}$  | 1.74 |
| 25         | 4    | rs17031489      | 155273743 | 0.0058                      | 1.37 | 925         | 0.0071                 | 1.37 |
| 25         | 4    | rs7681004       | 155332330 | 0.0014                      | 1.88 | 808         | 0.0020                 | 1.85 |
| 26         | 4    | rs9312559       | 175650116 | $1.57 \times 10^{-5}$       | 1.86 | 429         | 0.0004                 | 1.68 |
| 27         | 5    | rs6860373       | 30022683  | $8.13 \times 10^{-5}$       | 2.57 | 167         | 0.0077                 | 2.03 |
| 27         | 5    | rs6450743       | 30111525  | $4.72 \times 10^{-5}$       | 2.89 | 158         | 0.0073                 | 2.23 |
| 27         | 5    | rs9292371       | 30116542  | $2.56 \times 10^{-6}$       | 3.31 | 125         | 0.0144                 | 2.16 |
| 28         | 5    | rs271245        | 53187303  | 0.0003                      | 1.53 | 413         | 0.0014                 | 1.45 |
| 28         | 5    | rs697098        | 53324930  | 0.0001                      | 1.54 | 401         | 0.0003                 | 1.49 |
| 29         | 5    | rs7721254       | 101551842 | $9.24 \times 10^{-5}$       | 1.97 | 213         | 0.0010                 | 1.81 |
| 30         | 5    | rs6881055       | 113141831 | $5.96 \times 10^{-5}$       | 1.72 | 215         | 0.0015                 | 1.61 |
| 31         | 5    | rs59538022      | 142916502 | 0.0004                      | 1.52 | 301         | 0.0026                 | 1.45 |
| 33         | 5    | rs2070843       | 149824012 | 0.0002                      | 1.70 | 457         | 0.0013                 | 1.58 |
| 34         | 5    | rs10039049      | 150517899 | 0.0005                      | 1.48 | 556         | 0.0239                 | 1.30 |
| 35         | 6    | rs12529334      | 18510379  | 0.0005                      | 2.60 | 487         | 0.0049                 | 2.17 |
| 37         | 6    | rs61748643      | 38816505  | $8.00 \times 10^{-5}$       | 2.88 | 191         | 0.0074                 | 2.08 |
| 38         | 6    | rs9471082       | 39320702  | 0.0018                      | 1.92 | 625         | 0.0111                 | 1.69 |
| 39         | 6    | rs952880        | 73871994  | 0.0043                      | 1.43 | 427         | 0.0198                 | 1.34 |
| 41         | 6    | rs9485478       | 101687421 | 0.0038                      | 1.74 | 770         | 0.0387                 | 1.53 |
| 41         | 6    | rs77500196      | 101707830 | 0.0017                      | 1.86 | 634         | 0.0405                 | 1.54 |
| 42         | 6    | rs487697        | 117637300 | 0.0002                      | 1.54 | 349         | 0.0001                 | 1.59 |
| 43         | 6    | rs1321813       | 117828291 | 0.0011                      | 1.60 | 670         | 0.0718                 | 1.32 |
| 44         | 6    | rs2356183       | 118770264 | 0.0001                      | 1.55 | 482         | 0.0034                 | 1.40 |
| 44         | 6    | rs12194555      | 118819212 | 0.0001                      | 1.55 | 482         | 0.0021                 | 1.42 |
| 44         | 6    | rs541442        | 118884098 | 0.0002                      | 1.51 | 417         | 0.0019                 | 1.42 |
| 44         | 6    | rs6569026       | 118985767 | 0.0005                      | 1.48 | 581         | 0.0004                 | 1.52 |
| 45         | 6    | rs79449227      | 169311554 | 0.0001                      | 2.15 | 223         | 0.0136                 | 1.75 |
| 47         | 7    | rs2740761       | 55255986  | 0.0001                      | 2.00 | 232         | 0.0125                 | 1.59 |
| 49         | 8    | rs76087603      | 94044796  | $4.34 \times 10^{-7}$       | 2.88 | 130         | $3.58 \times 10^{-5}$  | 2.49 |
| 50         | 8    | rs16876379      | 108532275 | $4.38 \times 10^{-7}$       | 2.19 | 193         | $9.40 \times 10^{-5}$  | 1.89 |
| 51         | 8    | rs62513232      | 133530721 | 0.0002                      | 2.17 | 606         | 0.0018                 | 1.93 |
| 51         | 8    | rs10099843      | 133534460 | 0.0004                      | 2.04 | 244         | 0.0032                 | 1.84 |
| 53         | 9    | rs4741926       | 4232824   | $2.82 \times 10^{-5}$       | 1.63 | 337         | 0.0002                 | 1.56 |
| 53         | 9    | rs10756531      | 14152436  | 0.0003                      | 1.54 | 526         | 0.0003                 | 1.57 |

|    |    |            |           |                        |      |     |                       |      |
|----|----|------------|-----------|------------------------|------|-----|-----------------------|------|
| 55 | 9  | rs60798663 | 137755953 | $7.95 \times 10^{-7}$  | 2.53 | 134 | $3.25 \times 10^{-6}$ | 2.46 |
| 55 | 9  | rs4841940  | 137757212 | 0.0002                 | 2.01 | 175 | 0.0006                | 1.90 |
| 56 | 10 | rs10906701 | 14619045  | $9.47 \times 10^{-5}$  | 1.57 | 277 | 0.0024                | 1.43 |
| 57 | 11 | rs2056892  | 2773471   | $8.16 \times 10^{-6}$  | 1.69 | 440 | 0.0003                | 1.57 |
| 58 | 11 | rs10500802 | 14637391  | $6.49 \times 10^{-6}$  | 1.68 | 225 | $3.55 \times 10^{-5}$ | 1.62 |
| 59 | 11 | rs7927729  | 39962707  | 0.0005                 | 1.94 | 533 | 0.0085                | 1.66 |
| 60 | 11 | rs2186564  | 77583266  | $2.40 \times 10^{-5}$  | 1.75 | 327 | 0.0040                | 1.48 |
| 61 | 11 | rs2450135  | 77927995  | 0.0001                 | 1.55 | 351 | 0.0061                | 1.38 |
| 63 | 11 | rs10892996 | 123157134 | 0.0003                 | 1.51 | 408 | 0.0018                | 1.43 |
| 65 | 12 | rs1629029  | 43490897  | $1.46 \times 10^{-7}$  | 1.92 | 223 | $3.58 \times 10^{-5}$ | 1.70 |
| 66 | 12 | rs2641530  | 52384811  | 0.0009                 | 1.45 | 371 | 0.0167                | 1.33 |
| 67 | 12 | rs10459263 | 66538259  | 0.0002                 | 1.54 | 439 | 0.0005                | 1.49 |
| 68 | 12 | rs11110393 | 100881008 | 0.0004                 | 1.58 | 575 | 0.0006                | 1.57 |
| 68 | 12 | rs12317930 | 100905216 | 0.0002                 | 1.62 | 302 | 0.0002                | 1.65 |
| 69 | 13 | rs12430111 | 24408790  | $1.67 \times 10^{-5}$  | 1.63 | 359 | 0.0014                | 1.45 |
| 70 | 13 | rs1336679  | 69684265  | 0.0010                 | 1.45 | 646 | 0.0224                | 1.31 |
| 70 | 13 | rs7338279  | 69733326  | 0.0015                 | 1.54 | 648 | 0.0040                | 1.49 |
| 71 | 13 | rs9601390  | 81034504  | 0.0035                 | 1.54 | 296 | 0.0385                | 1.37 |
| 72 | 13 | rs8000037  | 93966179  | 0.0009                 | 1.46 | 382 | 0.0168                | 1.32 |
| 73 | 13 | rs966724   | 103347428 | $8.49 \times 10^{-5}$  | 1.66 | 329 | 0.0071                | 1.43 |
| 74 | 13 | rs9555548  | 109703988 | 0.0003                 | 2.16 | 705 | 0.0008                | 2.08 |
| 75 | 14 | rs8013963  | 42431239  | 0.0002                 | 1.93 | 625 | 0.0020                | 1.79 |
| 77 | 14 | rs917607   | 87563049  | $2.09 \times 10^{-6}$  | 3.49 | 135 | $3.30 \times 10^{-5}$ | 3.22 |
| 77 | 14 | rs72683475 | 87586015  | 0.0004                 | 2.54 | 195 | 0.0034                | 2.24 |
| 79 | 14 | rs78647847 | 102205333 | 0.0029                 | 1.78 | 678 | 0.0492                | 1.47 |
| 79 | 14 | rs1746586  | 102327818 | 0.0047                 | 1.50 | 815 | 0.0120                | 1.43 |
| 80 | 15 | rs4886647  | 74110101  | 0.0002                 | 1.51 | 447 | 0.0152                | 1.33 |
| 81 | 15 | rs4779128  | 79919955  | 0.0004                 | 1.65 | 583 | 0.0089                | 1.45 |
| 84 | 16 | rs12597065 | 71741624  | $3.40 \times 10^{-5}$  | 1.65 | 423 | 0.0017                | 1.47 |
| 85 | 16 | rs7194974  | 82373078  | 0.0009                 | 1.56 | 527 | 0.0027                | 1.51 |
| 86 | 17 | rs4790838  | 1800087   | $6.70 \times 10^{-5}$  | 1.55 | 314 | 0.0014                | 1.44 |
| 87 | 17 | rs2013260  | 65796533  | 0.0026                 | 1.46 | 420 | 0.0346                | 1.31 |
| 88 | 17 | rs623011   | 68259446  | $1.19 \times 10^{-8}$  | 1.92 | 213 | $4.48 \times 10^{-7}$ | 1.83 |
| 88 | 17 | rs17714860 | 68272354  | $8.65 \times 10^{-5}$  | 1.91 | 427 | 0.0014                | 1.74 |
| 88 | 17 | rs411079   | 68291371  | 0.0005                 | 1.56 | 572 | 0.0004                | 1.59 |
| 88 | 17 | rs7222503  | 68299785  | 0.0007                 | 1.81 | 573 | 0.0079                | 1.61 |
| 88 | 17 | rs312729   | 68306837  | $2.54 \times 10^{-10}$ | 2.05 | 178 | $2.10 \times 10^{-8}$ | 1.94 |
| 88 | 17 | rs312691   | 68326338  | $1.49 \times 10^{-10}$ | 2.06 | 174 | $4.97 \times 10^{-9}$ | 1.99 |
| 88 | 17 | rs12451295 | 68376823  | $3.36 \times 10^{-6}$  | 1.70 | 323 | $4.06 \times 10^{-6}$ | 1.72 |
| 88 | 17 | rs16975694 | 68380657  | 0.0012                 | 1.53 | 651 | 0.0007                | 1.58 |
| 88 | 17 | rs16975792 | 68433725  | 0.0004                 | 1.51 | 561 | 0.0004                | 1.53 |
| 88 | 17 | rs1605750  | 68471073  | 0.0022                 | 1.49 | 733 | 0.0046                | 1.46 |
| 88 | 17 | rs62069783 | 68492256  | 0.0016                 | 1.45 | 710 | 0.0030                | 1.43 |
| 88 | 17 | rs2109051  | 68588806  | 0.0107                 | 1.74 | 964 | 0.0057                | 1.85 |
| 89 | 17 | rs2713969  | 70773785  | 0.0006                 | 1.47 | 379 | 0.0094                | 1.35 |
| 90 | 18 | rs4595868  | 21693892  | $6.53 \times 10^{-5}$  | 1.65 | 264 | 0.0015                | 1.51 |
| 91 | 18 | rs7235371  | 33674808  | $7.17 \times 10^{-5}$  | 1.57 | 404 | 0.0005                | 1.50 |
| 93 | 20 | rs2423166  | 6526125   | 0.0004                 | 1.65 | 289 | 0.0101                | 1.48 |
| 94 | 20 | rs4239695  | 41981566  | 0.0017                 | 1.45 | 367 | 0.0255                | 1.32 |
| 96 | 20 | rs1570530  | 55155404  | 0.0002                 | 2.05 | 211 | 0.0295                | 1.57 |
| 97 | 21 | rs1993668  | 22848277  | 0.0006                 | 1.90 | 661 | 0.0010                | 1.89 |
| 99 | 22 | rs133501   | 48912283  | 0.0003                 | 1.52 | 520 | 0.0004                | 1.51 |

CHR, chromosome; SNP, single nucleotide polymorphism; BP, base position; TPP, thyrotoxic hypokalemic periodic paralysis; OR, odds ratio.

**eTable 2. Association results with TPP in the initial genome-wide scan, the replication stage analysis and the combined populations for the 100 SNPs.**

| Region No. | Chr. | SNP        | BP        | Annotated Genes         | Alleles | TPPvsControl Discovery (171 vs 2,160) |        |                       |                  |
|------------|------|------------|-----------|-------------------------|---------|---------------------------------------|--------|-----------------------|------------------|
|            |      |            |           |                         |         | F_TPP                                 | F_Cons | P-value               | OR (95% CI)      |
| 1          | 1    | rs6667605  | 2502780   | <i>TNFRSF14/C1orf93</i> | C/T     | 0.63                                  | 0.51   | $2.18 \times 10^{-5}$ | 1.63 (1.30-2.04) |
| 3          | 1    | rs16831558 | 44502163  | <i>SLC6A9/KLF17</i>     | T/C     | 0.45                                  | 0.33   | $2.41 \times 10^{-5}$ | 1.62 (1.30-2.02) |
| 3          | 1    | rs1007795  | 44517409  | <i>SLC6A9/KLF17</i>     | G/A     | 0.66                                  | 0.55   | $6.12 \times 10^{-5}$ | 1.60 (1.27-2.02) |
| 4          | 1    | rs1146530  | 96492489  | <i>PTBP2/RWDD3</i>      | C/A     | 0.88                                  | 0.78   | $2.76 \times 10^{-5}$ | 1.99 (1.43-2.78) |
| 4          | 1    | rs1144303  | 96496298  | <i>PTBP2/RWDD3</i>      | T/C     | 0.82                                  | 0.71   | $4.01 \times 10^{-5}$ | 1.79 (1.35-2.38) |
| 5          | 1    | rs539799   | 120208472 | <i>ZNF697/PHGDH</i>     | C/T     | 0.16                                  | 0.11   | 0.0025                | 1.57 (1.16-2.13) |
| 8          | 1    | rs4271175  | 182446188 | <i>RGSL1</i>            | T/G     | 0.15                                  | 0.08   | $3.36 \times 10^{-5}$ | 1.91 (1.40-2.62) |
| 9          | 1    | rs7529077  | 205561372 | <i>MFSD4</i>            | T/C     | 0.05                                  | 0.02   | $5.86 \times 10^{-5}$ | 2.87 (1.68-4.92) |
| 11         | 2    | rs13400534 | 1411883   | <i>TPO/SNTG2</i>        | T/C     | 0.72                                  | 0.62   | 0.0001                | 1.60 (1.26-2.04) |
| 14         | 2    | rs6751710  | 168975305 | <i>STK39</i>            | G/A     | 0.68                                  | 0.57   | $3.75 \times 10^{-5}$ | 1.64 (1.30-2.07) |
| 16         | 3    | rs6806226  | 3660691   | <i>LRRN1/CRBN</i>       | A/G     | 0.19                                  | 0.12   | 0.0005                | 1.65 (1.24-2.20) |
| 17         | 3    | rs16835753 | 124349120 | <i>KALRN</i>            | G/A     | 0.48                                  | 0.40   | 0.0025                | 1.40 (1.12-1.74) |
| 19         | 4    | rs10026043 | 21407094  | <i>KCNIP4</i>           | T/C     | 0.95                                  | 0.90   | 0.0010                | 2.33 (1.40-3.89) |
| 21         | 4    | rs10022828 | 40855358  | <i>APBB2</i>            | A/G     | 0.06                                  | 0.02   | $2.19 \times 10^{-6}$ | 3.04 (1.86-4.95) |
| 22         | 4    | rs28692179 | 84763256  | <i>AGPAT9/NKX6-1</i>    | T/C     | 0.41                                  | 0.32   | 0.0002                | 1.53 (1.22-1.91) |
| 23         | 4    | rs12511622 | 124615184 | <i>SPRY1/ANKRD50</i>    | C/T     | 0.41                                  | 0.34   | 0.0036                | 1.39 (1.12-1.74) |
| 25         | 4    | rs1352714  | 155243604 | <i>DCHS2</i>            | T/C     | 0.22                                  | 0.14   | $3.69 \times 10^{-5}$ | 1.74 (1.33-2.27) |
| 25         | 4    | rs17031489 | 155273743 | <i>DCHS2</i>            | G/A     | 0.63                                  | 0.56   | 0.0058                | 1.37 (1.09-1.72) |
| 25         | 4    | rs7681004  | 155332330 | <i>DCHS2</i>            | G/T     | 0.09                                  | 0.05   | 0.0014                | 1.88 (1.27-2.79) |
| 26         | 4    | rs9312559  | 175650116 | <i>GLRA3</i>            | A/G     | 0.82                                  | 0.71   | $1.57 \times 10^{-5}$ | 1.86 (1.40-2.46) |
| 27         | 5    | rs6860373  | 30022683  | <i>CDH6/CDH9</i>        | T/C     | 0.06                                  | 0.02   | $8.13 \times 10^{-5}$ | 2.57 (1.59-4.16) |
| 27         | 5    | rs6450743  | 30111525  | <i>CDH6/CDH9</i>        | C/T     | 0.05                                  | 0.02   | $4.72 \times 10^{-5}$ | 2.89 (1.71-4.88) |
| 27         | 5    | rs9292371  | 30116542  | <i>CDH6/CDH9</i>        | A/G     | 0.05                                  | 0.02   | $2.56 \times 10^{-6}$ | 3.31 (1.98-5.55) |
| 28         | 5    | rs271245   | 53187303  | <i>ARL15</i>            | C/A     | 0.65                                  | 0.55   | 0.0003                | 1.53 (1.22-1.93) |
| 28         | 5    | rs697098   | 53324930  | <i>ARL15</i>            | C/T     | 0.52                                  | 0.42   | 0.0001                | 1.54 (1.23-1.91) |
| 29         | 5    | rs7721254  | 101551842 | <i>SLCO4C1/ST8SIA4</i>  | T/C     | 0.13                                  | 0.07   | $9.24 \times 10^{-5}$ | 1.97 (1.40-2.77) |
| 30         | 5    | rs6881055  | 113141831 | <i>YTHDC2/KCNN2</i>     | G/A     | 0.23                                  | 0.15   | $5.96 \times 10^{-5}$ | 1.72 (1.32-2.23) |
| 31         | 5    | rs59538022 | 142916502 | <i>NR3C1/HMHB1</i>      | G/A     | 0.37                                  | 0.28   | 0.0004                | 1.52 (1.21-1.91) |
| 33         | 5    | rs2070843  | 149824012 | <i>RPS14</i>            | C/A     | 0.81                                  | 0.72   | 0.0002                | 1.70 (1.29-2.25) |
| 34         | 5    | rs10039049 | 150517899 | <i>ANXA6</i>            | T/C     | 0.54                                  | 0.44   | 0.0005                | 1.48 (1.19-1.84) |
| 35         | 6    | rs12529334 | 18510379  | <i>RNF144B/ID4</i>      | A/G     | 0.96                                  | 0.90   | 0.0005                | 2.60 (1.51-4.48) |
| 37         | 6    | rs61748643 | 38816505  | <i>DNAH8</i>            | T/C     | 0.05                                  | 0.02   | $8.00 \times 10^{-5}$ | 2.88 (1.68-4.93) |
| 38         | 6    | rs9471082  | 39320702  | <i>KIF6</i>             | C/T     | 0.93                                  | 0.87   | 0.0018                | 1.92 (1.26-2.91) |

|    |    |            |           |                          |     |      |      |                       |                  |
|----|----|------------|-----------|--------------------------|-----|------|------|-----------------------|------------------|
| 39 | 6  | rs952880   | 73871994  | <i>KCNQ5</i>             | C/A | 0.29 | 0.23 | 0.0043                | 1.43 (1.12-1.82) |
| 41 | 6  | rs9485478  | 101687421 | <i>GRIK2/ASCC3</i>       | C/A | 0.91 | 0.85 | 0.0038                | 1.74 (1.19-2.54) |
| 41 | 6  | rs77500196 | 101707830 | <i>GRIK2/ASCC3</i>       | T/G | 0.92 | 0.86 | 0.0017                | 1.86 (1.25-2.76) |
| 42 | 6  | rs487697   | 117637300 | <i>ROS1</i>              | C/T | 0.35 | 0.26 | 0.0002                | 1.54 (1.22-1.94) |
| 44 | 6  | rs2356183  | 118770264 | <i>C6orf204/SLC35F1</i>  | G/A | 0.41 | 0.31 | 0.0001                | 1.55 (1.24-1.93) |
| 44 | 6  | rs12194555 | 118819212 | <i>C6orf204</i>          | A/C | 0.41 | 0.31 | 0.0001                | 1.55 (1.24-1.93) |
| 44 | 6  | rs541442   | 118884098 | <i>C6orf204</i>          | T/G | 0.50 | 0.40 | 0.0002                | 1.51 (1.21-1.88) |
| 44 | 6  | rs6569026  | 118985767 | <i>C6orf204</i>          | C/T | 0.46 | 0.36 | 0.0005                | 1.48 (1.19-1.85) |
| 47 | 7  | rs2740761  | 55255986  | <i>EGFR</i>              | T/C | 0.12 | 0.06 | 0.0001                | 2.00 (1.40-2.84) |
| 49 | 8  | rs76087603 | 94044796  | <i>C8orf83/LOC389676</i> | T/G | 0.08 | 0.03 | $4.34 \times 10^{-7}$ | 2.88 (1.88-4.40) |
| 50 | 8  | rs16876379 | 108532275 | <i>ANGPT1/RSPO2</i>      | A/C | 0.15 | 0.08 | $4.38 \times 10^{-7}$ | 2.19 (1.60-3.00) |
| 51 | 8  | rs62513232 | 133530721 | <i>KCNQ3/LRRC6</i>       | T/C | 0.08 | 0.04 | 0.0002                | 2.17 (1.44-3.26) |
| 51 | 8  | rs10099843 | 133534460 | <i>KCNQ3/LRRC6</i>       | A/G | 0.09 | 0.04 | 0.0004                | 2.04 (1.37-3.05) |
| 53 | 9  | rs4741926  | 4232824   | <i>GLIS3</i>             | A/C | 0.37 | 0.26 | $2.82 \times 10^{-5}$ | 1.63 (1.30-2.06) |
| 53 | 9  | rs10756531 | 14152436  | <i>NFIB</i>              | C/A | 0.69 | 0.59 | 0.0003                | 1.54 (1.22-1.95) |
| 55 | 9  | rs60798663 | 137755953 | <i>FCN2/COL5A1</i>       | A/G | 0.10 | 0.04 | $7.95 \times 10^{-7}$ | 2.53 (1.73-3.70) |
| 55 | 9  | rs4841940  | 137757212 | <i>FCN2/COL5A1</i>       | T/C | 0.10 | 0.05 | 0.0002                | 2.01 (1.39-2.91) |
| 56 | 10 | rs10906701 | 14619045  | <i>FAM107B</i>           | C/T | 0.36 | 0.27 | $9.47 \times 10^{-5}$ | 1.57 (1.25-1.98) |
| 57 | 11 | rs2056892  | 2773471   | <i>KCNQ1</i>             | C/A | 0.67 | 0.55 | $8.16 \times 10^{-6}$ | 1.69 (1.34-2.14) |
| 58 | 11 | rs10500802 | 14637391  | <i>PSMA1</i>             | T/G | 0.39 | 0.27 | $6.49 \times 10^{-6}$ | 1.68 (1.34-2.10) |
| 59 | 11 | rs7927729  | 39962707  | <i>LRRC4C/C11orf74</i>   | G/A | 0.91 | 0.84 | 0.0005                | 1.94 (1.32-2.85) |
| 60 | 11 | rs2186564  | 77583266  | <i>C11orf67</i>          | A/G | 0.25 | 0.16 | $2.40 \times 10^{-5}$ | 1.75 (1.35-2.27) |
| 61 | 11 | rs2450135  | 77927995  | <i>GAB2</i>              | A/G | 0.44 | 0.34 | 0.0001                | 1.55 (1.24-1.93) |
| 63 | 11 | rs10892996 | 123157134 | <i>CLMP/GRAMD1B</i>      | C/T | 0.54 | 0.44 | 0.0003                | 1.51 (1.21-1.88) |
| 65 | 12 | rs1629029  | 43490897  | <i>ADAMTS20/PRICKLE1</i> | C/T | 0.30 | 0.18 | $1.46 \times 10^{-7}$ | 1.92 (1.51-2.45) |
| 66 | 12 | rs2641530  | 52384811  | <i>ACVR1B</i>            | C/T | 0.47 | 0.38 | 0.0009                | 1.45 (1.16-1.80) |
| 67 | 12 | rs10459263 | 66538259  | <i>TMBIM4</i>            | G/A | 0.62 | 0.51 | 0.0002                | 1.54 (1.23-1.93) |
| 68 | 12 | rs11110393 | 100881008 | <i>NR1H4</i>             | C/T | 0.27 | 0.19 | 0.0004                | 1.58 (1.23-2.03) |
| 68 | 12 | rs12317930 | 100905216 | <i>NR1H4</i>             | G/T | 0.25 | 0.17 | 0.0002                | 1.62 (1.25-2.09) |
| 69 | 13 | rs12430111 | 24408790  | <i>MIPEP</i>             | G/A | 0.43 | 0.31 | $1.67 \times 10^{-5}$ | 1.63 (1.30-2.04) |
| 70 | 13 | rs1336679  | 69684265  | <i>KLHL1/PCDH9</i>       | T/C | 0.60 | 0.51 | 0.0010                | 1.45 (1.16-1.82) |
| 70 | 13 | rs7338279  | 69733326  | <i>KLHL1/PCDH9</i>       | T/C | 0.79 | 0.70 | 0.0015                | 1.54 (1.18-2.01) |
| 71 | 13 | rs9601390  | 81034504  | <i>SPRY2/SLITRK1</i>     | A/G | 0.17 | 0.12 | 0.0035                | 1.54 (1.15-2.07) |
| 72 | 13 | rs8000037  | 93966179  | <i>GPC6</i>              | A/C | 0.57 | 0.47 | 0.0009                | 1.46 (1.17-1.82) |
| 73 | 13 | rs966724   | 103347428 | <i>METTL21C/CCDC168</i>  | T/G | 0.26 | 0.17 | $8.49 \times 10^{-5}$ | 1.66 (1.29-2.14) |
| 74 | 13 | rs9555548  | 109703988 | <i>MYO16</i>             | C/T | 0.93 | 0.86 | 0.0003                | 2.16 (1.41-3.30) |

|    |    |            |           |                            |     |      |      |                        |                  |
|----|----|------------|-----------|----------------------------|-----|------|------|------------------------|------------------|
| 75 | 14 | rs8013963  | 42431239  | <i>LRFN5/FSCB</i>          | A/G | 0.11 | 0.06 | 0.0002                 | 1.93 (1.35-2.77) |
| 77 | 14 | rs917607   | 87563049  | <i>GALC/FLRT2</i>          | T/G | 0.05 | 0.01 | $2.09 \times 10^{-6}$  | 3.49 (2.02-6.04) |
| 77 | 14 | rs72683475 | 87586015  | <i>GALC/FLRT2</i>          | A/G | 0.05 | 0.02 | 0.0004                 | 2.54 (1.49-4.32) |
| 79 | 14 | rs78647847 | 102205333 | <i>PPP2R5C/DIO3</i>        | A/G | 0.91 | 0.85 | 0.0029                 | 1.78 (1.21-2.61) |
| 79 | 14 | rs1746586  | 102327818 | <i>PPP2R5C</i>             | T/C | 0.81 | 0.74 | 0.0047                 | 1.50 (1.13-1.98) |
| 80 | 15 | rs4886647  | 74110101  | <i>TBC1D21/C15orf59</i>    | T/C | 0.58 | 0.48 | 0.0002                 | 1.51 (1.21-1.89) |
| 81 | 15 | rs4779128  | 79919955  | <i>KIAA1024/MTHFS</i>      | A/C | 0.20 | 0.13 | 0.0004                 | 1.65 (1.25-2.17) |
| 84 | 16 | rs12597065 | 71741624  | <i>PHLPP2</i>              | C/T | 0.32 | 0.22 | $3.40 \times 10^{-5}$  | 1.65 (1.30-2.10) |
| 85 | 16 | rs7194974  | 82373078  | <i>MPHOSP6/CDH13</i>       | C/T | 0.79 | 0.71 | 0.0009                 | 1.56 (1.19-2.03) |
| 86 | 17 | rs4790838  | 1800087   | <i>RPA1</i>                | G/A | 0.46 | 0.35 | $6.70 \times 10^{-5}$  | 1.55 (1.25-1.94) |
| 87 | 17 | rs2013260  | 65796533  | <i>BPTF/NOL11</i>          | C/T | 0.73 | 0.65 | 0.0026                 | 1.46 (1.14-1.86) |
| 88 | 17 | rs623011   | 68259446  | <i>KCNJ2/CTD-2378E21.1</i> | A/G | 0.63 | 0.47 | $1.19 \times 10^{-8}$  | 1.92 (1.53-2.41) |
| 88 | 17 | rs17714860 | 68272354  | <i>KCNJ2/CTD-2378E21.1</i> | G/A | 0.88 | 0.79 | $8.65 \times 10^{-5}$  | 1.91 (1.37-2.66) |
| 88 | 17 | rs411079   | 68291371  | <i>KCNJ2/CTD-2378E21.1</i> | C/A | 0.76 | 0.67 | 0.0005                 | 1.56 (1.21-2.01) |
| 88 | 17 | rs7222503  | 68299785  | <i>KCNJ2/CTD-2378E21.1</i> | G/T | 0.89 | 0.82 | 0.0007                 | 1.81 (1.27-2.56) |
| 88 | 17 | rs312729   | 68306837  | <i>KCNJ2/CTD-2378E21.1</i> | A/G | 0.64 | 0.47 | $2.54 \times 10^{-10}$ | 2.05 (1.63-2.57) |
| 88 | 17 | rs312691   | 68326338  | <i>CTD-2378E21.1</i>       | C/T | 0.64 | 0.46 | $1.49 \times 10^{-10}$ | 2.06 (1.64-2.59) |
| 88 | 17 | rs12451295 | 68376823  | <i>CTD-2378E21.1/SOX9</i>  | C/T | 0.63 | 0.50 | $3.36 \times 10^{-6}$  | 1.70 (1.36-2.13) |
| 88 | 17 | rs16975694 | 68380657  | <i>CTD-2378E21.1/SOX9</i>  | T/C | 0.78 | 0.70 | 0.0012                 | 1.53 (1.18-1.99) |
| 88 | 17 | rs16975792 | 68433725  | <i>CTD-2378E21.1/SOX9</i>  | G/A | 0.67 | 0.57 | 0.0004                 | 1.51 (1.20-1.91) |
| 88 | 17 | rs1605750  | 68471073  | <i>CTD-2378E21.1/SOX9</i>  | A/G | 0.77 | 0.69 | 0.0022                 | 1.49 (1.15-1.93) |
| 88 | 17 | rs62069783 | 68492256  | <i>CTD-2378E21.1/SOX9</i>  | C/T | 0.69 | 0.60 | 0.0016                 | 1.45 (1.15-1.84) |
| 88 | 17 | rs2109051  | 68588806  | <i>CTD-2378E21.1/SOX9</i>  | A/C | 0.93 | 0.89 | 0.0107                 | 1.74 (1.13-2.69) |
| 89 | 17 | rs2713969  | 70773785  | <i>SLC39A11</i>            | C/T | 0.46 | 0.37 | 0.0006                 | 1.47 (1.18-1.83) |
| 90 | 18 | rs4595868  | 21693892  | <i>TTC39C</i>              | T/C | 0.27 | 0.18 | $6.53 \times 10^{-5}$  | 1.65 (1.29-2.12) |
| 91 | 18 | rs7235371  | 33674808  | <i>SLC39A6/RPRD1A</i>      | A/G | 0.53 | 0.42 | $7.17 \times 10^{-5}$  | 1.57 (1.26-1.96) |
| 93 | 20 | rs2423166  | 6526125   | <i>BMP2/FERMT1</i>         | T/C | 0.19 | 0.13 | 0.0004                 | 1.65 (1.25-2.19) |
| 94 | 20 | rs4239695  | 41981566  | <i>SRSF6/PTPRT</i>         | A/G | 0.35 | 0.27 | 0.0017                 | 1.45 (1.15-1.83) |
| 96 | 20 | rs1570530  | 55155404  | <i>C20orf107/TFAP2C</i>    | G/A | 0.09 | 0.05 | 0.0002                 | 2.05 (1.39-3.02) |
| 97 | 21 | rs1993668  | 22848277  | <i>NCAM2</i>               | A/G | 0.10 | 0.06 | 0.0006                 | 1.90 (1.31-2.74) |
| 99 | 22 | rs133501   | 48912283  | <i>FAM19A5</i>             | C/T | 0.64 | 0.54 | 0.0003                 | 1.52 (1.21-1.91) |



**Continued eTable 2**

| SNP        | TPPvsControl Replication (362 vs 1,089) |        |                       |                  | TPPvsControl Combined (533 vs 3,249) |        |                       |                  |                          |             |
|------------|-----------------------------------------|--------|-----------------------|------------------|--------------------------------------|--------|-----------------------|------------------|--------------------------|-------------|
|            | F_TPP                                   | F_Cons | P-value               | OR (95% CI)      | F_TPP                                | F_Cons | P-value               | OR (95% CI)      | Breslow-Day Test P-value | Sample size |
| rs6667605  | 0.54                                    | 0.53   | 0.8128                | 1.02 (0.86-1.21) | 0.57                                 | 0.52   | 0.0053                | 1.22 (1.07-1.39) | 0.0012                   | 2364        |
| rs16831558 | 0.36                                    | 0.33   | 0.1547                | 1.14 (0.95-1.36) | 0.39                                 | 0.33   | 0.0002                | 1.27 (1.11-1.46) | 0.0145                   | 1731        |
| rs1007795  | 0.57                                    | 0.57   | 0.9902                | 1.00 (0.84-1.18) | 0.60                                 | 0.56   | 0.0139                | 1.19 (1.04-1.36) | 0.0012                   | 3174        |
| rs1146530  | 0.81                                    | 0.80   | 0.4638                | 1.08 (0.87-1.34) | 0.83                                 | 0.79   | 0.0017                | 1.33 (1.12-1.57) | 0.0022                   | 1909        |
| rs1144303  | 0.75                                    | 0.72   | 0.0945                | 1.17 (0.97-1.42) | 0.77                                 | 0.72   | 0.0001                | 1.34 (1.15-1.56) | 0.0144                   | 1461        |
| rs539799   | 0.10                                    | 0.13   | 0.0576                | 0.77 (0.58-1.01) | 0.12                                 | 0.12   | 0.8166                | 1.05 (0.86-1.29) | 0.0004                   | 89821       |
| rs4271175  | 0.11                                    | 0.10   | 0.5294                | 1.09 (0.83-1.44) | 0.12                                 | 0.09   | 0.0034                | 1.41 (1.15-1.72) | 0.0078                   | 2017        |
| rs7529077  | 0.02                                    | 0.02   | 0.5984                | 0.86 (0.48-1.53) | 0.03                                 | 0.02   | 0.0571                | 1.53 (1.03-2.26) | 0.0018                   | 5063        |
| rs13400534 | 0.67                                    | 0.63   | 0.0490                | 1.20 (1.00-1.44) | 0.69                                 | 0.62   | $8.40 \times 10^{-5}$ | 1.35 (1.17-1.55) | 0.0607                   | 1167        |
| rs6751710  | 0.61                                    | 0.61   | 0.9922                | 1.00 (0.84-1.19) | 0.63                                 | 0.58   | 0.0106                | 1.24 (1.08-1.41) | 0.0008                   | 2126        |
| rs6806226  | 0.13                                    | 0.12   | 0.3566                | 1.12 (0.87-1.44) | 0.15                                 | 0.12   | 0.0044                | 1.27 (1.06-1.53) | 0.0441                   | 3215        |
| rs16835753 | 0.40                                    | 0.43   | 0.1509                | 0.88 (0.74-1.05) | 0.42                                 | 0.41   | 0.5007                | 1.07 (0.94-1.22) | 0.0012                   | 20717       |
| rs10026043 | 0.91                                    | 0.90   | 0.8287                | 1.03 (0.77-1.38) | 0.92                                 | 0.90   | 0.0263                | 1.31 (1.03-1.66) | 0.0055                   | 4034        |
| rs10022828 | 0.03                                    | 0.03   | 0.5790                | 1.14 (0.71-1.82) | 0.04                                 | 0.02   | 0.0022                | 1.83 (1.31-2.55) | 0.0035                   | 1535        |
| rs28692179 | 0.32                                    | 0.32   | 0.9256                | 0.99 (0.83-1.19) | 0.35                                 | 0.32   | 0.0275                | 1.16 (1.01-1.32) | 0.0033                   | 4675        |
| rs12511622 | 0.31                                    | 0.38   | 0.0006                | 0.73 (0.61-0.87) | 0.34                                 | 0.35   | 0.3337                | 0.96 (0.84-1.10) | $8.53 \times 10^{-6}$    | 66505       |
| rs1352714  | 0.19                                    | 0.14   | $5.03 \times 10^{-5}$ | 1.51 (1.24-1.84) | 0.20                                 | 0.14   | $1.24 \times 10^{-8}$ | 1.58 (1.35-1.85) | 0.4052                   | 759         |
| rs17031489 | 0.59                                    | 0.56   | 0.1775                | 1.13 (0.95-1.34) | 0.61                                 | 0.56   | 0.0062                | 1.21 (1.06-1.38) | 0.1782                   | 2649        |
| rs7681004  | 0.08                                    | 0.05   | 0.0079                | 1.57 (1.12-2.20) | 0.08                                 | 0.05   | $5.56 \times 10^{-5}$ | 1.68 (1.31-2.15) | 0.4973                   | 1361        |
| rs9312559  | 0.69                                    | 0.73   | 0.0298                | 0.82 (0.68-0.98) | 0.73                                 | 0.71   | 0.3235                | 1.08 (0.93-1.25) | $1.36 \times 10^{-6}$    | 19768       |
| rs6860373  | 0.03                                    | 0.02   | 0.5568                | 1.18 (0.69-2.01) | 0.04                                 | 0.02   | 0.0027                | 1.60 (1.12-2.27) | 0.0309                   | 2739        |
| rs6450743  | 0.02                                    | 0.02   | 0.3234                | 1.35 (0.75-2.45) | 0.03                                 | 0.02   | 0.0006                | 1.81 (1.23-2.66) | 0.0562                   | 2355        |
| rs9292371  | 0.03                                    | 0.04   | 0.1432                | 0.66 (0.40-1.12) | 0.03                                 | 0.02   | 0.2643                | 1.47 (1.02-2.12) | $4.68 \times 10^{-6}$    | 4279        |
| rs271245   | 0.52                                    | 0.57   | 0.0339                | 0.83 (0.70-0.98) | 0.56                                 | 0.55   | 0.5832                | 1.04 (0.91-1.18) | $2.32 \times 10^{-5}$    | 60836       |
| rs697098   | 0.43                                    | 0.46   | 0.1951                | 0.89 (0.75-1.06) | 0.46                                 | 0.43   | 0.1880                | 1.13 (1.00-1.29) | 0.0001                   | 6232        |
| rs7721254  | 0.07                                    | 0.08   | 0.5261                | 0.90 (0.65-1.24) | 0.09                                 | 0.07   | 0.0650                | 1.27 (1.01-1.60) | 0.0009                   | 5478        |
| rs6881055  | 0.16                                    | 0.18   | 0.4664                | 0.92 (0.73-1.15) | 0.19                                 | 0.16   | 0.0653                | 1.21 (1.02-1.43) | 0.0004                   | 4377        |
| rs59538022 | 0.25                                    | 0.30   | 0.0131                | 0.78 (0.65-0.95) | 0.29                                 | 0.29   | 0.8546                | 1.02 (0.89-1.18) | $1.11 \times 10^{-5}$    | 284645      |
| rs2070843  | 0.72                                    | 0.74   | 0.2954                | 0.90 (0.75-1.09) | 0.75                                 | 0.72   | 0.1386                | 1.13 (0.97-1.31) | 0.0002                   | 8136        |
| rs10039049 | 0.46                                    | 0.45   | 0.6139                | 1.05 (0.88-1.24) | 0.49                                 | 0.44   | 0.0110                | 1.19 (1.05-1.36) | 0.0140                   | 3064        |
| rs12529334 | 0.92                                    | 0.92   | 0.6406                | 1.08 (0.79-1.48) | 0.94                                 | 0.91   | 0.0082                | 1.49 (1.15-1.94) | 0.0050                   | 2181        |
| rs61748643 | 0.03                                    | 0.02   | 0.0246                | 1.77 (1.06-2.94) | 0.04                                 | 0.02   | $3.15 \times 10^{-5}$ | 2.17 (1.51-3.12) | 0.1905                   | 1242        |
| rs9471082  | 0.86                                    | 0.88   | 0.1612                | 0.84 (0.65-1.07) | 0.88                                 | 0.87   | 0.4400                | 1.08 (0.88-1.31) | 0.0006                   | 35732       |
| rs952880   | 0.24                                    | 0.23   | 0.6227                | 1.05 (0.86-1.28) | 0.26                                 | 0.23   | 0.0312                | 1.17 (1.01-1.36) | 0.0556                   | 5033        |
| rs9485478  | 0.87                                    | 0.87   | 0.9668                | 1.00 (0.77-1.28) | 0.88                                 | 0.86   | 0.0743                | 1.25 (1.02-1.53) | 0.0157                   | 4267        |
| rs77500196 | 0.87                                    | 0.87   | 0.9597                | 0.99 (0.77-1.28) | 0.89                                 | 0.86   | 0.0583                | 1.25 (1.02-1.53) | 0.0082                   | 4554        |
| rs487697   | 0.30                                    | 0.29   | 0.4812                | 1.07 (0.89-1.29) | 0.32                                 | 0.27   | 0.0052                | 1.26 (1.09-1.45) | 0.0156                   | 2026        |
| rs2356183  | 0.35                                    | 0.33   | 0.1162                | 1.14 (0.97-1.34) | 0.37                                 | 0.32   | 0.0005                | 1.27 (1.11-1.45) | 0.0308                   | 1774        |
| rs12194555 | 0.36                                    | 0.31   | 0.0401                | 1.21 (1.01-1.45) | 0.37                                 | 0.31   | $6.47 \times 10^{-5}$ | 1.32 (1.15-1.51) | 0.0938                   | 1307        |
| rs541442   | 0.46                                    | 0.42   | 0.0428                | 1.17 (1.01-1.37) | 0.47                                 | 0.41   | 0.0002                | 1.28 (1.13-1.45) | 0.0677                   | 1531        |
| rs6569026  | 0.40                                    | 0.38   | 0.2077                | 1.12 (0.94-1.33) | 0.42                                 | 0.37   | 0.0018                | 1.25 (1.09-1.42) | 0.0478                   | 1917        |
| rs2740761  | 0.06                                    | 0.06   | 0.6323                | 0.92 (0.64-1.31) | 0.08                                 | 0.06   | 0.0384                | 1.26 (0.98-1.61) | 0.0021                   | 6769        |
| rs76087603 | 0.04                                    | 0.03   | 0.2803                | 1.29 (0.81-2.03) | 0.05                                 | 0.03   | $6.06 \times 10^{-5}$ | 1.79 (1.31-2.43) | 0.0099                   | 1674        |
| rs16876379 | 0.08                                    | 0.09   | 0.6465                | 0.93 (0.68-1.27) | 0.10                                 | 0.08   | 0.0075                | 1.34 (1.08-1.67) | 0.0001                   | 3156        |
| rs62513232 | 0.05                                    | 0.04   | 0.2235                | 1.27 (0.86-1.88) | 0.06                                 | 0.04   | 0.0011                | 1.56 (1.19-2.06) | 0.0637                   | 2368        |
| rs10099843 | 0.05                                    | 0.05   | 0.5753                | 1.11 (0.76-1.62) | 0.06                                 | 0.05   | 0.0099                | 1.44 (1.10-1.89) | 0.0294                   | 2993        |
| rs4741926  | 0.29                                    | 0.28   | 0.8072                | 1.02 (0.85-1.23) | 0.31                                 | 0.27   | 0.0061                | 1.25 (1.08-1.43) | 0.0019                   | 2177        |

|            |      |      |                        |                  |      |      |                        |                  |                       |        |
|------------|------|------|------------------------|------------------|------|------|------------------------|------------------|-----------------------|--------|
| rs10756531 | 0.58 | 0.60 | 0.2732                 | 0.91 (0.77-1.08) | 0.62 | 0.60 | 0.1771                 | 1.09 (0.95-1.24) | 0.0004                | 13112  |
| rs60798663 | 0.06 | 0.05 | 0.3868                 | 1.17 (0.82-1.67) | 0.08 | 0.05 | 0.0004                 | 1.67 (1.29-2.15) | 0.0031                | 1397   |
| rs4841940  | 0.07 | 0.06 | 0.3264                 | 1.19 (0.84-1.68) | 0.08 | 0.06 | 0.0021                 | 1.46 (1.14-1.87) | 0.0401                | 2336   |
| rs10906701 | 0.30 | 0.30 | 0.8259                 | 0.98 (0.81-1.18) | 0.32 | 0.28 | 0.0302                 | 1.21 (1.05-1.39) | 0.0016                | 3006   |
| rs2056892  | 0.55 | 0.56 | 0.8885                 | 0.99 (0.83-1.17) | 0.59 | 0.55 | 0.0086                 | 1.18 (1.04-1.35) | 0.0002                | 3477   |
| rs10500802 | 0.29 | 0.27 | 0.2383                 | 1.12 (0.93-1.35) | 0.32 | 0.27 | 0.0002                 | 1.28 (1.11-1.47) | 0.0065                | 1770   |
| rs7927729  | 0.89 | 0.86 | 0.0282                 | 1.33 (1.03-1.73) | 0.90 | 0.85 | 0.0001                 | 1.55 (1.26-1.91) | 0.1109                | 1152   |
| rs2186564  | 0.22 | 0.17 | 0.0008                 | 1.37 (1.14-1.65) | 0.23 | 0.17 | $2.80 \times 10^{-7}$  | 1.50 (1.29-1.74) | 0.1307                | 855    |
| rs2450135  | 0.47 | 0.46 | 0.6653                 | 1.05 (0.88-1.24) | 0.46 | 0.38 | 0.0071                 | 1.41 (1.23-1.60) | 0.0060                | 797    |
| rs10892996 | 0.44 | 0.44 | 0.9757                 | 1.00 (0.85-1.19) | 0.48 | 0.44 | 0.0224                 | 1.16 (1.02-1.32) | 0.0038                | 4222   |
| rs1629029  | 0.18 | 0.20 | 0.2655                 | 0.88 (0.71-1.10) | 0.22 | 0.19 | 0.0179                 | 1.21 (1.04-1.42) | $2.69 \times 10^{-6}$ | 3851   |
| rs2641530  | 0.42 | 0.40 | 0.3262                 | 1.09 (0.92-1.30) | 0.44 | 0.39 | 0.0052                 | 1.23 (1.08-1.40) | 0.0476                | 2215   |
| rs10459263 | 0.55 | 0.51 | 0.1323                 | 1.14 (0.96-1.35) | 0.57 | 0.51 | 0.0004                 | 1.26 (1.10-1.44) | 0.0374                | 1755   |
| rs11110393 | 0.16 | 0.18 | 0.1261                 | 0.84 (0.67-1.05) | 0.19 | 0.19 | 0.3057                 | 1.05 (0.89-1.24) | 0.0002                | 61897  |
| rs12317930 | 0.15 | 0.18 | 0.0290                 | 0.77 (0.61-0.97) | 0.18 | 0.18 | 0.5885                 | 1.03 (0.87-1.22) | $2.08 \times 10^{-5}$ | 177054 |
| rs12430111 | 0.36 | 0.31 | 0.0326                 | 1.22 (1.02-1.45) | 0.38 | 0.31 | $1.45 \times 10^{-5}$  | 1.34 (1.17-1.54) | 0.0452                | 1173   |
| rs1336679  | 0.56 | 0.52 | 0.1068                 | 1.16 (0.98-1.37) | 0.57 | 0.51 | 0.0008                 | 1.27 (1.12-1.45) | 0.1070                | 1642   |
| rs7338279  | 0.72 | 0.72 | 0.7423                 | 1.03 (0.85-1.25) | 0.74 | 0.71 | 0.0265                 | 1.20 (1.03-1.39) | 0.0171                | 3551   |
| rs9601390  | 0.12 | 0.12 | 0.8926                 | 1.02 (0.79-1.32) | 0.14 | 0.12 | 0.0614                 | 1.19 (0.99-1.44) | 0.0380                | 6672   |
| rs8000037  | 0.49 | 0.48 | 0.9388                 | 1.01 (0.85-1.19) | 0.51 | 0.48 | 0.0349                 | 1.15 (1.01-1.31) | 0.0089                | 4734   |
| rs966724   | 0.16 | 0.16 | 0.8087                 | 1.03 (0.81-1.29) | 0.19 | 0.17 | 0.0074                 | 1.18 (1.00-1.39) | 0.0055                | 5597   |
| rs9555548  | 0.89 | 0.88 | 0.8857                 | 1.02 (0.78-1.33) | 0.90 | 0.87 | 0.0154                 | 1.36 (1.10-1.69) | 0.0028                | 2498   |
| rs8013963  | 0.07 | 0.09 | 0.1158                 | 0.77 (0.56-1.07) | 0.08 | 0.07 | 0.4550                 | 1.21 (0.95-1.53) | 0.0001                | 8832   |
| rs917607   | 0.02 | 0.02 | 0.2253                 | 0.67 (0.35-1.30) | 0.03 | 0.02 | 0.0801                 | 1.54 (1.01-2.34) | $5.69 \times 10^{-5}$ | 4892   |
| rs72683475 | 0.02 | 0.02 | 0.4212                 | 0.77 (0.42-1.43) | 0.03 | 0.02 | 0.1322                 | 1.34 (0.90-2.01) | 0.0030                | 11563  |
| rs78647847 | 0.89 | 0.87 | 0.2253                 | 1.18 (0.91-1.53) | 0.89 | 0.86 | 0.0048                 | 1.40 (1.14-1.73) | 0.0812                | 1980   |
| rs1746586  | 0.76 | 0.77 | 0.2759                 | 0.90 (0.73-1.10) | 0.77 | 0.75 | 0.3325                 | 1.12 (0.96-1.31) | 0.0033                | 10239  |
| rs4886647  | 0.50 | 0.48 | 0.5743                 | 1.05 (0.89-1.24) | 0.52 | 0.48 | 0.0068                 | 1.19 (1.05-1.36) | 0.0101                | 3061   |
| rs4779128  | 0.15 | 0.14 | 0.6601                 | 1.06 (0.83-1.34) | 0.17 | 0.14 | 0.0121                 | 1.27 (1.06-1.51) | 0.0163                | 3030   |
| rs12597065 | 0.22 | 0.24 | 0.4508                 | 0.93 (0.76-1.13) | 0.25 | 0.23 | 0.0528                 | 1.17 (1.00-1.35) | 0.0003                | 5033   |
| rs7194974  | 0.71 | 0.73 | 0.3932                 | 0.92 (0.76-1.11) | 0.74 | 0.71 | 0.1798                 | 1.12 (0.97-1.30) | 0.0016                | 9214   |
| rs4790838  | 0.37 | 0.36 | 0.4739                 | 1.07 (0.90-1.27) | 0.40 | 0.36 | 0.0029                 | 1.22 (1.07-1.39) | 0.0091                | 2462   |
| rs2013260  | 0.63 | 0.63 | 0.8355                 | 0.98 (0.82-1.17) | 0.66 | 0.64 | 0.0937                 | 1.09 (0.95-1.25) | 0.0100                | 13716  |
| rs623011   | 0.63 | 0.46 | $5.33 \times 10^{-15}$ | 2.00 (1.69-2.38) | 0.63 | 0.46 | $1.33 \times 10^{-22}$ | 1.96 (1.72-2.24) | 0.7715                | 215    |
| rs17714860 | 0.87 | 0.80 | $6.27 \times 10^{-5}$  | 1.63 (1.28-2.07) | 0.87 | 0.79 | $2.31 \times 10^{-8}$  | 1.74 (1.44-2.10) | 0.4434                | 590    |
| rs411079   | 0.77 | 0.67 | $2.11 \times 10^{-7}$  | 1.71 (1.40-2.09) | 0.77 | 0.67 | $1.26 \times 10^{-10}$ | 1.64 (1.40-1.91) | 0.5380                | 497    |
| rs7222503  | 0.89 | 0.83 | $2.02 \times 10^{-5}$  | 1.76 (1.35-2.29) | 0.89 | 0.82 | $6.17 \times 10^{-8}$  | 1.79 (1.45-2.20) | 0.9328                | 624    |
| rs312729   | 0.65 | 0.47 | $8.75 \times 10^{-20}$ | 2.11 (1.79-2.48) | 0.65 | 0.47 | $8.02 \times 10^{-29}$ | 2.08 (1.83-2.38) | 0.8325                | 182    |
| rs312691   | 0.63 | 0.46 | $1.31 \times 10^{-14}$ | 1.99 (1.67-2.37) | 0.63 | 0.46 | $6.08 \times 10^{-24}$ | 2.02 (1.77-2.31) | 0.7888                | 196    |
| rs12451295 | 0.6  | 0.48 | $1.32 \times 10^{-8}$  | 1.63 (1.38-1.94) | 0.61 | 0.49 | $2.41 \times 10^{-13}$ | 1.61 (1.41-1.84) | 0.7743                | 422    |
| rs16975694 | 0.76 | 0.69 | 0.0003                 | 1.43 (1.18-1.74) | 0.77 | 0.69 | $1.30 \times 10^{-6}$  | 1.45 (1.25-1.69) | 0.6925                | 886    |
| rs16975792 | 0.66 | 0.57 | $2.42 \times 10^{-5}$  | 1.46 (1.22-1.73) | 0.66 | 0.57 | $4.04 \times 10^{-8}$  | 1.46 (1.27-1.67) | 0.7892                | 700    |
| rs1605750  | 0.75 | 0.69 | 0.0036                 | 1.32 (1.09-1.60) | 0.75 | 0.69 | $4.17 \times 10^{-5}$  | 1.37 (1.18-1.59) | 0.4690                | 1212   |
| rs62069783 | 0.67 | 0.60 | 0.0007                 | 1.34 (1.13-1.60) | 0.67 | 0.60 | $6.41 \times 10^{-6}$  | 1.37 (1.19-1.57) | 0.6098                | 1035   |
| rs2109051  | 0.9  | 0.87 | 0.0559                 | 1.30 (0.99-1.70) | 0.91 | 0.88 | 0.0024                 | 1.33 (1.06-1.66) | 0.2568                | 3340   |
| rs2713969  | 0.38 | 0.38 | 0.8425                 | 0.98 (0.83-1.17) | 0.41 | 0.37 | 0.0532                 | 1.14 (1.00-1.31) | 0.0051                | 5613   |
| rs4595868  | 0.22 | 0.20 | 0.1475                 | 1.17 (0.95-1.43) | 0.24 | 0.19 | 0.0004                 | 1.35 (1.16-1.58) | 0.0349                | 1445   |
| rs7235371  | 0.47 | 0.43 | 0.0649                 | 1.18 (0.99-1.39) | 0.49 | 0.42 | 8.92E-05               | 1.31 (1.15-1.49) | 0.0409                | 1275   |
| rs2423166  | 0.14 | 0.14 | 0.9971                 | 1.00 (0.78-1.28) | 0.16 | 0.13 | 0.0338                 | 1.24 (1.03-1.48) | 0.0081                | 4010   |
| rs4239695  | 0.26 | 0.28 | 0.2106                 | 0.88 (0.73-1.07) | 0.29 | 0.27 | 0.3444                 | 1.07 (0.92-1.23) | 0.0012                | 24586  |
| rs1570530  | 0.04 | 0.06 | 0.0496                 | 0.67 (0.44-1.01) | 0.06 | 0.05 | 0.5206                 | 1.12 (0.85-1.49) | $7.00 \times 10^{-5}$ | 35556  |
| rs1993668  | 0.05 | 0.05 | 0.9911                 | 1.00 (0.69-1.45) | 0.07 | 0.06 | 0.0293                 | 1.27 (0.98-1.64) | 0.0150                | 6302   |
| rs133501   | 0.53 | 0.53 | 0.8983                 | 0.99 (0.83-1.17) | 0.56 | 0.53 | 0.0357                 | 1.13 (0.99-1.28) | 0.0030                | 6276   |

| Continued eTable 2 |                                      |      |                       |                  |                        |      |                       |                  |
|--------------------|--------------------------------------|------|-----------------------|------------------|------------------------|------|-----------------------|------------------|
| SNP                | maleTPPvsmalesControl (455 vs 1,648) |      |                       |                  | TPPvsGD (533 vs 1,404) |      |                       |                  |
|                    | F_TPP                                | F_GD | P-value               | OR (95% CI)      | F_TPP                  | F_GD | P-value               | OR (95% CI)      |
| rs6667605          | 0.58                                 | 0.52 | 0.0046                | 1.23 (1.08-1.45) | 0.57                   | 0.55 | 0.3266                | 1.07 (0.93-1.24) |
| rs16831558         | 0.39                                 | 0.32 | 0.0002                | 1.35 (1.16-1.57) | 0.38                   | 0.35 | 0.0949                | 1.13 (0.98-1.31) |
| rs1007795          | 0.60                                 | 0.56 | 0.0328                | 1.18 (1.02-1.37) | 0.60                   | 0.57 | 0.1096                | 1.13 (0.97-1.30) |
| rs1146530          | 0.83                                 | 0.79 | 0.0052                | 1.32 (1.09-1.61) | 0.83                   | 0.80 | 0.0469                | 1.21 (1.01-1.46) |
| rs1144303          | 0.77                                 | 0.72 | 0.0007                | 1.35 (1.14-1.59) | 0.77                   | 0.73 | 0.0089                | 1.25 (1.06-1.48) |
| rs539799           | 0.13                                 | 0.12 | 0.5835                | 1.06 (0.85-1.33) | 0.12                   | 0.12 | 0.6328                | 1.05 (0.85-1.31) |
| rs4271175          | 0.12                                 | 0.09 | 0.0046                | 1.39 (1.10-1.76) | 0.12                   | 0.10 | 0.0224                | 1.30 (1.04-1.62) |
| rs7529077          | 0.03                                 | 0.02 | 0.0412                | 1.56 (1.02-2.39) | 0.03                   | 0.02 | 0.1357                | 1.39 (0.90-2.14) |
| rs13400534         | 0.68                                 | 0.63 | 0.0031                | 1.27 (1.09-1.49) | 0.69                   | 0.65 | 0.0119                | 1.21 (1.04-1.41) |
| rs6751710          | 0.64                                 | 0.59 | 0.0069                | 1.23 (1.06-1.45) | 0.63                   | 0.58 | 0.0045                | 1.23 (1.07-1.41) |
| rs6806226          | 0.16                                 | 0.12 | 0.0031                | 1.35 (1.10-1.66) | 0.15                   | 0.14 | 0.4401                | 1.08 (0.89-1.32) |
| rs16835753         | 0.43                                 | 0.41 | 0.2320                | 1.10 (0.94-1.27) | 0.42                   | 0.41 | 0.4950                | 1.05 (0.91-1.21) |
| rs10026043         | 0.92                                 | 0.90 | 0.0851                | 1.27 (0.97-1.64) | 0.92                   | 0.90 | 0.0647                | 1.26 (0.98-1.62) |
| rs10022828         | 0.05                                 | 0.03 | 0.0020                | 1.76 (1.22-2.56) | 0.04                   | 0.03 | 0.0067                | 1.68 (1.15-2.46) |
| rs28692179         | 0.35                                 | 0.31 | 0.0323                | 1.19 (1.02-1.38) | 0.35                   | 0.32 | 0.1015                | 1.13 (0.98-1.31) |
| rs12511622         | 0.34                                 | 0.37 | 0.1624                | 0.89 (0.77-1.05) | 0.34                   | 0.35 | 0.8252                | 0.98 (0.85-1.14) |
| rs1352714          | 0.20                                 | 0.13 | $5.48 \times 10^{-8}$ | 1.65 (1.38-1.99) | 0.20                   | 0.15 | $7.01 \times 10^{-6}$ | 1.46 (1.24-1.72) |
| rs17031489         | 0.61                                 | 0.56 | 0.0087                | 1.22 (1.05-1.43) | 0.60                   | 0.55 | 0.0025                | 1.24 (1.08-1.44) |
| rs7681004          | 0.08                                 | 0.05 | 0.0004                | 1.73 (1.27-2.35) | 0.08                   | 0.05 | 0.0002                | 1.64 (1.25-2.14) |
| rs9312559          | 0.73                                 | 0.72 | 0.6231                | 1.04 (0.88-1.23) | 0.73                   | 0.73 | 0.9978                | 1.00 (0.85-1.17) |
| rs6860373          | 0.04                                 | 0.02 | 0.0180                | 1.65 (1.09-2.48) | 0.04                   | 0.03 | 0.2352                | 1.27 (0.86-1.86) |
| rs6450743          | 0.03                                 | 0.02 | 0.0083                | 1.84 (1.17-2.89) | 0.03                   | 0.02 | 0.0282                | 1.63 (1.06-2.51) |
| rs9292371          | 0.04                                 | 0.03 | 0.5084                | 1.15 (0.77-1.73) | 0.04                   | 0.02 | 0.0061                | 1.83 (1.20-2.79) |
| rs271245           | 0.56                                 | 0.56 | 0.9629                | 1.00 (0.86-1.16) | 0.56                   | 0.56 | 0.9242                | 1.01 (0.87-1.16) |
| rs697098           | 0.47                                 | 0.45 | 0.2632                | 1.09 (0.94-1.26) | 0.46                   | 0.43 | 0.0398                | 1.15 (1.01-1.32) |
| rs7721254          | 0.09                                 | 0.08 | 0.3272                | 1.14 (0.88-1.49) | 0.09                   | 0.07 | 0.1193                | 1.23 (0.95-1.59) |
| rs6881055          | 0.19                                 | 0.16 | 0.0482                | 1.21 (1.00-1.47) | 0.19                   | 0.16 | 0.0523                | 1.21 (1.00-1.45) |
| rs59538022         | 0.29                                 | 0.29 | 0.9683                | 1.00 (0.85-1.17) | 0.29                   | 0.28 | 0.6337                | 1.04 (0.89-1.21) |
| rs2070843          | 0.75                                 | 0.72 | 0.0621                | 1.18 (0.99-1.39) | 0.75                   | 0.73 | 0.3666                | 1.08 (0.92-1.26) |
| rs10039049         | 0.50                                 | 0.45 | 0.0148                | 1.20 (1.04-1.39) | 0.49                   | 0.47 | 0.5016                | 1.05 (0.91-1.21) |
| rs12529334         | 0.93                                 | 0.91 | 0.0066                | 1.49 (1.12-2.00) | 0.94                   | 0.92 | 0.0441                | 1.33 (1.01-1.76) |
| rs61748643         | 0.04                                 | 0.02 | $8.82 \times 10^{-5}$ | 2.27 (1.49-3.46) | 0.04                   | 0.02 | 0.0057                | 1.74 (1.17-2.59) |
| rs9471082          | 0.89                                 | 0.87 | 0.3171                | 1.12 (0.89-1.41) | 0.88                   | 0.87 | 0.6445                | 1.05 (0.85-1.31) |

|            |      |      |                       |                  |      |      |                       |                  |
|------------|------|------|-----------------------|------------------|------|------|-----------------------|------------------|
| rs952880   | 0.26 | 0.23 | 0.0281                | 1.21 (1.02-1.43) | 0.26 | 0.24 | 0.2420                | 1.10 (0.94-1.30) |
| rs9485478  | 0.89 | 0.86 | 0.0512                | 1.25 (1.00-1.56) | 0.88 | 0.86 | 0.0888                | 1.21 (0.97-1.50) |
| rs77500196 | 0.89 | 0.86 | 0.0385                | 1.27 (1.01-1.61) | 0.89 | 0.87 | 0.0987                | 1.20 (0.97-1.50) |
| rs487697   | 0.31 | 0.27 | 0.0262                | 1.20 (1.02-1.41) | 0.32 | 0.28 | 0.0331                | 1.18 (1.01-1.38) |
| rs2356183  | 0.37 | 0.32 | 0.0007                | 1.30 (1.12-1.51) | 0.37 | 0.32 | 0.0019                | 1.24 (1.08-1.41) |
| rs12194555 | 0.38 | 0.31 | $7.49 \times 10^{-5}$ | 1.37 (1.17-1.59) | 0.37 | 0.33 | 0.0048                | 1.23 (1.06-1.43) |
| rs541442   | 0.48 | 0.41 | 0.0002                | 1.31 (1.14-1.52) | 0.47 | 0.42 | 0.0015                | 1.23 (1.08-1.40) |
| rs6569026  | 0.43 | 0.37 | 0.0009                | 1.29 (1.11-1.51) | 0.42 | 0.36 | 0.0012                | 1.27 (1.10-1.46) |
| rs2740761  | 0.08 | 0.06 | 0.0842                | 1.28 (0.97-1.69) | 0.07 | 0.07 | 0.8136                | 1.03 (0.79-1.35) |
| rs76087603 | 0.06 | 0.03 | $4.66 \times 10^{-5}$ | 2.04 (1.44-2.89) | 0.05 | 0.04 | 0.0372                | 1.41 (1.02-1.95) |
| rs16876379 | 0.11 | 0.08 | 0.0124                | 1.38 (1.08-1.77) | 0.10 | 0.09 | 0.2517                | 1.15 (0.91-1.45) |
| rs62513232 | 0.07 | 0.04 | 0.0007                | 1.71 (1.25-2.35) | 0.06 | 0.04 | 0.0160                | 1.46 (1.07-1.98) |
| rs10099843 | 0.07 | 0.04 | 0.0038                | 1.56 (1.15-2.12) | 0.07 | 0.05 | 0.0513                | 1.34 (1.00-1.81) |
| rs4741926  | 0.32 | 0.28 | 0.0118                | 1.23 (1.05-1.45) | 0.32 | 0.28 | 0.0245                | 1.19 (1.02-1.39) |
| rs10756531 | 0.62 | 0.61 | 0.3440                | 1.08 (0.93-1.25) | 0.62 | 0.59 | 0.1831                | 1.10 (0.96-1.28) |
| rs60798663 | 0.08 | 0.05 | 0.0013                | 1.59 (1.20-2.11) | 0.08 | 0.05 | 0.0002                | 1.68 (1.27-2.21) |
| rs4841940  | 0.08 | 0.06 | 0.0073                | 1.46 (1.11-1.93) | 0.08 | 0.06 | 0.0081                | 1.42 (1.09-1.85) |
| rs10906701 | 0.32 | 0.29 | 0.0561                | 1.17 (0.99-1.37) | 0.32 | 0.29 | 0.0500                | 1.17 (1.00-1.36) |
| rs2056892  | 0.60 | 0.56 | 0.0146                | 1.20 (1.04-1.41) | 0.59 | 0.58 | 0.3954                | 1.06 (0.92-1.22) |
| rs10500802 | 0.32 | 0.27 | 0.0011                | 1.30 (1.11-1.53) | 0.33 | 0.28 | 0.0064                | 1.23 (1.06-1.42) |
| rs7927729  | 0.90 | 0.86 | 0.0014                | 1.45 (1.15-1.85) | 0.90 | 0.86 | 0.0030                | 1.39 (1.12-1.73) |
| rs2186564  | 0.22 | 0.18 | 0.0010                | 1.34 (1.13-1.60) | 0.23 | 0.18 | 0.0005                | 1.32 (1.13-1.54) |
| rs2450135  | 0.47 | 0.41 | 0.0075                | 1.26 (1.09-1.46) | 0.46 | 0.36 | $1.15 \times 10^{-7}$ | 1.51 (1.31-1.74) |
| rs10892996 | 0.48 | 0.44 | 0.0250                | 1.19 (1.02-1.37) | 0.48 | 0.45 | 0.2252                | 1.09 (0.95-1.26) |
| rs1629029  | 0.22 | 0.19 | 0.0376                | 1.21 (1.01-1.45) | 0.22 | 0.20 | 0.3179                | 1.09 (0.92-1.30) |
| rs2641530  | 0.42 | 0.39 | 0.0638                | 1.15 (0.99-1.34) | 0.43 | 0.39 | 0.0303                | 1.18 (1.02-1.36) |
| rs10459263 | 0.57 | 0.51 | 0.0019                | 1.27 (1.09-1.47) | 0.57 | 0.52 | 0.0026                | 1.24 (1.08-1.43) |
| rs11110393 | 0.19 | 0.18 | 0.3726                | 1.09 (0.90-1.31) | 0.19 | 0.18 | 0.5144                | 1.06 (0.89-1.27) |
| rs12317930 | 0.18 | 0.18 | 0.5996                | 1.05 (0.87-1.28) | 0.18 | 0.17 | 0.5043                | 1.07 (0.88-1.28) |
| rs12430111 | 0.38 | 0.32 | 0.0003                | 1.32 (1.14-1.54) | 0.38 | 0.33 | 0.0086                | 1.22 (1.05-1.41) |
| rs1336679  | 0.56 | 0.51 | 0.0068                | 1.23 (1.06-1.43) | 0.57 | 0.53 | 0.0334                | 1.17 (1.01-1.35) |
| rs7338279  | 0.74 | 0.71 | 0.1498                | 1.14 (0.95-1.33) | 0.74 | 0.71 | 0.0417                | 1.18 (1.01-1.39) |
| rs9601390  | 0.14 | 0.12 | 0.0750                | 1.22 (0.98-1.51) | 0.14 | 0.13 | 0.5555                | 1.06 (0.87-1.31) |
| rs8000037  | 0.51 | 0.48 | 0.1103                | 1.13 (0.97-1.31) | 0.51 | 0.50 | 0.4322                | 1.06 (0.92-1.22) |
| rs966724   | 0.19 | 0.16 | 0.0062                | 1.28 (1.06-1.55) | 0.19 | 0.19 | 0.9819                | 1.00 (0.83-1.19) |
| rs9555548  | 0.90 | 0.87 | 0.0113                | 1.37 (1.08-1.72) | 0.90 | 0.87 | 0.0085                | 1.35 (1.08-1.69) |

|            |      |      |                        |                  |      |      |                        |                  |
|------------|------|------|------------------------|------------------|------|------|------------------------|------------------|
| rs8013963  | 0.08 | 0.07 | 0.7704                 | 1.04 (0.79-1.37) | 0.08 | 0.06 | 0.0356                 | 1.33 (1.02-1.73) |
| rs917607   | 0.03 | 0.02 | 0.0944                 | 1.49 (0.93-2.39) | 0.03 | 0.02 | 0.0212                 | 1.72 (1.09-2.73) |
| rs72683475 | 0.03 | 0.02 | 0.2845                 | 1.28 (0.82-2.00) | 0.03 | 0.02 | 0.4766                 | 1.18 (0.76-1.82) |
| rs78647847 | 0.90 | 0.86 | 0.0030                 | 1.43 (1.14-1.82) | 0.89 | 0.87 | 0.0888                 | 1.22 (0.97-1.53) |
| rs1746586  | 0.78 | 0.76 | 0.4242                 | 1.08 (0.90-1.28) | 0.77 | 0.75 | 0.2045                 | 1.11 (0.94-1.32) |
| rs4886647  | 0.52 | 0.48 | 0.0145                 | 1.20 (1.04-1.40) | 0.52 | 0.51 | 0.4282                 | 1.06 (0.92-1.22) |
| rs4779128  | 0.17 | 0.13 | 0.0017                 | 1.38 (1.13-1.68) | 0.17 | 0.15 | 0.1076                 | 1.17 (0.96-1.42) |
| rs12597065 | 0.26 | 0.23 | 0.0833                 | 1.16 (0.98-1.38) | 0.26 | 0.24 | 0.4236                 | 1.07 (0.91-1.26) |
| rs7194974  | 0.73 | 0.71 | 0.3960                 | 1.08 (0.91-1.27) | 0.74 | 0.71 | 0.1329                 | 1.13 (0.96-1.33) |
| rs4790838  | 0.41 | 0.36 | 0.0070                 | 1.23 (1.06-1.43) | 0.40 | 0.37 | 0.0772                 | 1.14 (0.99-1.32) |
| rs2013260  | 0.66 | 0.64 | 0.2363                 | 1.10 (0.94-1.28) | 0.66 | 0.67 | 0.7441                 | 0.97 (0.84-1.13) |
| rs623011   | 0.66 | 0.47 | $9.00 \times 10^{-22}$ | 2.19 (1.87-2.57) | 0.63 | 0.46 | $4.95 \times 10^{-20}$ | 1.96 (1.70-2.26) |
| rs17714860 | 0.88 | 0.80 | $6.87 \times 10^{-8}$  | 1.85 (1.47-2.33) | 0.87 | 0.80 | $1.25 \times 10^{-7}$  | 1.71 (1.40-2.08) |
| rs411079   | 0.79 | 0.67 | $9.04 \times 10^{-12}$ | 1.89 (1.59-2.27) | 0.77 | 0.67 | $5.24 \times 10^{-11}$ | 1.69 (1.44-1.99) |
| rs7222503  | 0.90 | 0.83 | $6.17 \times 10^{-7}$  | 1.85 (1.45-2.38) | 0.89 | 0.83 | $8.04 \times 10^{-7}$  | 1.72 (1.38-2.13) |
| rs312729   | 0.68 | 0.48 | $3.12 \times 10^{-27}$ | 2.33 (2.00-2.70) | 0.65 | 0.47 | $3.12 \times 10^{-27}$ | 2.10 (1.84-2.40) |
| rs312691   | 0.66 | 0.47 | $3.48 \times 10^{-22}$ | 2.22 (1.89-2.56) | 0.63 | 0.45 | $7.02 \times 10^{-24}$ | 2.08 (1.81-2.39) |
| rs12451295 | 0.63 | 0.50 | $1.57 \times 10^{-11}$ | 1.72 (1.47-2.00) | 0.61 | 0.48 | $3.91 \times 10^{-12}$ | 1.64 (1.43-1.89) |
| rs16975694 | 0.79 | 0.70 | $6.03 \times 10^{-7}$  | 1.59 (1.32-1.89) | 0.77 | 0.69 | $3.59 \times 10^{-7}$  | 1.50 (1.28-1.76) |
| rs16975792 | 0.68 | 0.58 | $7.50 \times 10^{-8}$  | 1.54 (1.32-1.82) | 0.66 | 0.56 | $2.81 \times 10^{-8}$  | 1.50 (1.30-1.73) |
| rs1605750  | 0.77 | 0.69 | $2.06 \times 10^{-6}$  | 1.52 (1.28-1.82) | 0.75 | 0.68 | $2.16 \times 10^{-5}$  | 1.40 (1.19-1.64) |
| rs62069783 | 0.69 | 0.60 | $1.31 \times 10^{-6}$  | 1.47 (1.25-1.72) | 0.67 | 0.60 | $1.33 \times 10^{-5}$  | 1.37 (1.19-1.59) |
| rs2109051  | 0.92 | 0.88 | 0.0056                 | 1.45 (1.11-1.89) | 0.91 | 0.88 | 0.0158                 | 1.34 (1.06-1.70) |
| rs2713969  | 0.42 | 0.38 | 0.0385                 | 1.17 (1.01-1.36) | 0.40 | 0.38 | 0.2647                 | 1.09 (0.94-1.26) |
| rs4595868  | 0.23 | 0.19 | 0.0025                 | 1.32 (1.11-1.57) | 0.24 | 0.20 | 0.0031                 | 1.28 (1.09-1.51) |
| rs7235371  | 0.49 | 0.43 | 0.0013                 | 1.28 (1.11-1.49) | 0.49 | 0.42 | 0.0004                 | 1.29 (1.12-1.48) |
| rs2423166  | 0.16 | 0.14 | 0.1622                 | 1.16 (0.94-1.41) | 0.16 | 0.13 | 0.0394                 | 1.24 (1.01-1.51) |
| rs4239695  | 0.29 | 0.27 | 0.1834                 | 1.12 (0.95-1.32) | 0.28 | 0.29 | 0.9842                 | 1.00 (0.85-1.17) |
| rs1570530  | 0.06 | 0.06 | 0.7659                 | 1.05 (0.77-1.44) | 0.06 | 0.06 | 0.6781                 | 0.94 (0.69-1.27) |
| rs1993668  | 0.07 | 0.05 | 0.0280                 | 1.39 (1.04-1.87) | 0.07 | 0.06 | 0.1561                 | 1.23 (0.92-1.63) |
| rs133501   | 0.56 | 0.53 | 0.0975                 | 1.14 (0.98-1.32) | 0.56 | 0.53 | 0.0882                 | 1.13 (0.98-1.31) |

| Continued eTable 2 |                               |      |         |                  |                                 |            |         |                  |       |       |
|--------------------|-------------------------------|------|---------|------------------|---------------------------------|------------|---------|------------------|-------|-------|
| SNP                | maleTPPvs maleGD (455 vs 315) |      |         |                  | GD vs Controls (1,404 vs 3,249) |            |         |                  | F_CHB | F_EUR |
|                    | F_TPP                         | F_GD | P-value | OR (95% CI)      | F_GD                            | F_Controls | P-value | OR (95% CI)      |       |       |
| rs6667605          | 0.58                          | 0.55 | 0.3237  | 1.11 (0.90-1.37) | 0.55                            | 0.52       | 0.0045  | 1.14 (1.04-1.24) | 0.52  | 0.50  |
| rs16831558         | 0.39                          | 0.38 | 0.7875  | 1.03 (0.83-1.27) | 0.35                            | 0.33       | 0.0194  | 1.12 (1.02-1.23) | 0.33  | 0.19  |
| rs1007795          | 0.60                          | 0.60 | 0.8388  | 1.02 (0.83-1.27) | 0.57                            | 0.56       | 0.2571  | 1.05 (0.96-1.15) | 0.56  | 0.52  |
| rs1146530          | 0.83                          | 0.78 | 0.0092  | 1.43 (1.10-1.85) | 0.80                            | 0.79       | 0.1268  | 1.09 (0.98-1.22) | 0.79  | 0.91  |
| rs1144303          | 0.77                          | 0.71 | 0.0098  | 1.37 (1.09-1.75) | 0.73                            | 0.72       | 0.2238  | 1.06 (0.96-1.17) | 0.72  | 0.74  |
| rs539799           | 0.13                          | 0.10 | 0.1321  | 1.28 (0.93-1.78) | 0.12                            | 0.12       | 0.9604  | 1.00 (0.87-1.14) | 0.12  | 0.46  |
| rs4271175          | 0.12                          | 0.09 | 0.0957  | 1.33 (0.95-1.86) | 0.10                            | 0.09       | 0.2745  | 1.09 (0.94-1.27) | 0.09  | 0.21  |
| rs7529077          | 0.03                          | 0.02 | 0.1789  | 1.55 (0.82-2.94) | 0.02                            | 0.02       | 0.5177  | 1.11 (0.81-1.50) | 0.02  | 0.20  |
| rs13400534         | 0.68                          | 0.64 | 0.0410  | 1.20 (1.00-1.43) | 0.65                            | 0.62       | 0.0313  | 1.11 (1.01-1.22) | 0.62  | 0.56  |
| rs6751710          | 0.64                          | 0.59 | 0.0413  | 1.20 (1.01-1.43) | 0.58                            | 0.58       | 0.9296  | 1.00 (0.92-1.09) | 0.58  | 0.61  |
| rs6806226          | 0.16                          | 0.14 | 0.3483  | 1.15 (0.86-1.53) | 0.14                            | 0.12       | 0.0141  | 1.17 (1.03-1.34) | 0.12  | 0.10  |
| rs16835753         | 0.43                          | 0.39 | 0.1427  | 1.17 (0.95-1.44) | 0.41                            | 0.41       | 0.7495  | 1.02 (0.93-1.11) | 0.41  | 0.58  |
| rs10026043         | 0.92                          | 0.89 | 0.0218  | 1.41 (1.05-1.89) | 0.90                            | 0.90       | 0.6235  | 1.04 (0.90-1.19) | 0.90  | 0.99  |
| rs10022828         | 0.05                          | 0.03 | 0.0363  | 1.85 (1.03-3.32) | 0.03                            | 0.02       | 0.6636  | 1.07 (0.80-1.41) | 0.02  | 0.02  |
| rs28692179         | 0.35                          | 0.34 | 0.6011  | 1.06 (0.85-1.31) | 0.32                            | 0.32       | 0.5912  | 1.03 (0.93-1.13) | 0.32  | 0.11  |
| rs12511622         | 0.34                          | 0.37 | 0.2590  | 0.90 (0.76-1.08) | 0.35                            | 0.35       | 0.6842  | 0.98 (0.90-1.07) | 0.35  | 0.25  |
| rs1352714          | 0.20                          | 0.16 | 0.0099  | 1.32 (1.07-1.64) | 0.15                            | 0.14       | 0.0921  | 1.08 (0.99-1.17) | 0.14  | 0.03  |
| rs17031489         | 0.61                          | 0.57 | 0.1133  | 1.18 (0.95-1.45) | 0.55                            | 0.56       | 0.4473  | 0.97 (0.88-1.06) | 0.56  | 0.68  |
| rs7681004          | 0.08                          | 0.05 | 0.0090  | 1.58 (1.11-2.24) | 0.05                            | 0.05       | 0.7537  | 1.03 (0.85-1.24) | 0.05  | 0.01  |
| rs9312559          | 0.73                          | 0.74 | 0.6669  | 0.95 (0.75-1.20) | 0.73                            | 0.71       | 0.1144  | 1.08 (0.98-1.20) | 0.71  | 0.36  |
| rs6860373          | 0.04                          | 0.03 | 0.6854  | 1.12 (0.65-1.96) | 0.03                            | 0.02       | 0.0832  | 1.27 (0.97-1.66) | 0.02  | 0.30  |
| rs6450743          | 0.03                          | 0.02 | 0.2824  | 1.44 (0.75-2.75) | 0.02                            | 0.02       | 0.5208  | 1.11 (0.81-1.53) | 0.02  | 0.04  |
| rs9292371          | 0.04                          | 0.02 | 0.2096  | 1.50 (0.81-2.80) | 0.02                            | 0.02       | 0.1928  | 0.81 (0.59-1.10) | 0.02  | 0.06  |
| rs271245           | 0.56                          | 0.58 | 0.5949  | 0.94 (0.77-1.16) | 0.56                            | 0.55       | 0.4910  | 1.03 (0.94-1.13) | 0.55  | 0.98  |
| rs697098           | 0.47                          | 0.43 | 0.0484  | 1.18 (1.00-1.40) | 0.43                            | 0.43       | 0.7501  | 0.99 (0.91-1.07) | 0.43  | 0.53  |
| rs7721254          | 0.09                          | 0.09 | 0.7949  | 0.95 (0.66-1.36) | 0.07                            | 0.07       | 0.7520  | 1.03 (0.87-1.22) | 0.07  | 0.08  |
| rs6881055          | 0.19                          | 0.14 | 0.0111  | 1.44 (1.08-1.90) | 0.16                            | 0.16       | 0.9702  | 1.00 (0.89-1.13) | 0.16  | 0.39  |
| rs59538022         | 0.29                          | 0.30 | 0.7086  | 0.96 (0.77-1.20) | 0.28                            | 0.29       | 0.7815  | 0.99 (0.89-1.09) | 0.29  | 0.03  |
| rs2070843          | 0.75                          | 0.75 | 0.8924  | 0.98 (0.78-1.25) | 0.73                            | 0.72       | 0.4013  | 1.04 (0.95-1.15) | 0.72  | 0.99  |
| rs10039049         | 0.50                          | 0.50 | 0.8633  | 0.98 (0.80-1.21) | 0.47                            | 0.44       | 0.0070  | 1.13 (1.03-1.23) | 0.44  | 0.67  |
| rs12529334         | 0.93                          | 0.91 | 0.0614  | 1.45 (0.99-2.13) | 0.92                            | 0.91       | 0.1729  | 1.12 (0.96-1.31) | 0.91  | 0.79  |
| rs61748643         | 0.04                          | 0.02 | 0.0105  | 1.90 (1.15-3.11) | 0.02                            | 0.02       | 0.1534  | 1.25 (0.92-1.71) | 0.02  | 0.01  |

|            |      |      |        |                  |      |      |        |                  |      |      |
|------------|------|------|--------|------------------|------|------|--------|------------------|------|------|
| rs9471082  | 0.88 | 0.88 | 0.7867 | 1.04 (0.76-1.43) | 0.87 | 0.87 | 0.7952 | 1.02 (0.89-1.16) | 0.87 | 0.81 |
| rs952880   | 0.26 | 0.23 | 0.1429 | 1.19 (0.94-1.51) | 0.24 | 0.23 | 0.2361 | 1.07 (0.96-1.18) | 0.23 | 0.42 |
| rs9485478  | 0.89 | 0.86 | 0.1384 | 1.27 (0.93-1.72) | 0.86 | 0.86 | 0.6382 | 1.03 (0.91-1.17) | 0.86 | 0.97 |
| rs77500196 | 0.89 | 0.86 | 0.1447 | 1.27 (0.93-1.72) | 0.87 | 0.86 | 0.6294 | 1.03 (0.91-1.18) | 0.86 | 0.98 |
| rs487697   | 0.31 | 0.33 | 0.4599 | 0.92 (0.74-1.15) | 0.28 | 0.27 | 0.1951 | 1.07 (0.97-1.18) | 0.27 | 0.32 |
| rs2356183  | 0.37 | 0.30 | 0.0005 | 1.36 (1.14-1.63) | 0.32 | 0.32 | 0.5151 | 1.02 (0.96-1.09) | 0.32 | 0.47 |
| rs12194555 | 0.37 | 0.30 | 0.0005 | 1.37 (1.15-1.64) | 0.33 | 0.31 | 0.1832 | 1.07 (0.97-1.17) | 0.31 | 0.48 |
| rs541442   | 0.48 | 0.41 | 0.0006 | 1.34 (1.13-1.58) | 0.42 | 0.41 | 0.4275 | 1.03 (0.96-1.09) | 0.41 | 0.73 |
| rs6569026  | 0.43 | 0.33 | 0.0002 | 1.50 (1.21-1.85) | 0.36 | 0.37 | 0.6405 | 0.98 (0.89-1.07) | 0.37 | 0.68 |
| rs2740761  | 0.08 | 0.08 | 0.7936 | 0.95 (0.65-1.39) | 0.07 | 0.06 | 0.0543 | 1.19 (1.00-1.42) | 0.06 | 0.21 |
| rs76087603 | 0.06 | 0.04 | 0.0317 | 1.55 (1.04-2.30) | 0.04 | 0.03 | 0.0408 | 1.26 (1.01-1.58) | 0.03 | 0.10 |
| rs16876379 | 0.11 | 0.10 | 0.6554 | 1.08 (0.77-1.51) | 0.09 | 0.08 | 0.0458 | 1.17 (1.00-1.37) | 0.08 | 0.16 |
| rs62513232 | 0.07 | 0.04 | 0.0134 | 1.84 (1.13-3.01) | 0.04 | 0.04 | 0.4967 | 1.08 (0.87-1.34) | 0.04 | 0.23 |
| rs10099843 | 0.07 | 0.04 | 0.0163 | 1.77 (1.10-2.86) | 0.05 | 0.05 | 0.4725 | 1.08 (0.88-1.32) | 0.05 | 0.23 |
| rs4741926  | 0.32 | 0.31 | 0.6683 | 1.05 (0.84-1.31) | 0.28 | 0.27 | 0.3480 | 1.05 (0.95-1.16) | 0.27 | 0.44 |
| rs10756531 | 0.62 | 0.60 | 0.4392 | 1.09 (0.88-1.33) | 0.59 | 0.60 | 0.7418 | 0.99 (0.90-1.08) | 0.60 | 0.62 |
| rs60798663 | 0.08 | 0.05 | 0.0006 | 1.84 (1.29-2.61) | 0.05 | 0.05 | 0.9485 | 0.99 (0.82-1.21) | 0.05 | 0.15 |
| rs4841940  | 0.08 | 0.05 | 0.0073 | 1.58 (1.13-2.20) | 0.06 | 0.06 | 0.7720 | 1.03 (0.86-1.23) | 0.06 | 0.19 |
| rs10906701 | 0.32 | 0.31 | 0.7364 | 1.04 (0.83-1.30) | 0.29 | 0.28 | 0.4680 | 1.04 (0.94-1.14) | 0.28 | 0.06 |
| rs2056892  | 0.61 | 0.58 | 0.1934 | 1.12 (0.94-1.33) | 0.58 | 0.55 | 0.0072 | 1.12 (1.03-1.22) | 0.55 | 0.57 |
| rs10500802 | 0.32 | 0.27 | 0.0038 | 1.31 (1.09-1.58) | 0.28 | 0.27 | 0.3039 | 1.05 (0.96-1.15) | 0.27 | 0.08 |
| rs7927729  | 0.90 | 0.86 | 0.0086 | 1.43 (1.09-1.85) | 0.86 | 0.85 | 0.0617 | 1.12 (0.99-1.26) | 0.85 | 0.81 |
| rs2186564  | 0.22 | 0.20 | 0.2521 | 1.13 (0.92-1.38) | 0.18 | 0.17 | 0.0021 | 1.13 (1.05-1.22) | 0.17 | 0.12 |
| rs2450135  | 0.46 | 0.38 | 0.0017 | 1.44 (1.17-1.78) | 0.36 | 0.38 | 0.1280 | 0.93 (0.85-1.02) | 0.38 | 0.05 |
| rs10892996 | 0.48 | 0.44 | 0.1039 | 1.19 (0.97-1.46) | 0.45 | 0.44 | 0.2224 | 1.06 (0.97-1.16) | 0.44 | 0.48 |
| rs1629029  | 0.22 | 0.21 | 0.5096 | 1.09 (0.85-1.40) | 0.20 | 0.19 | 0.0677 | 1.11 (0.99-1.24) | 0.19 | 0.35 |
| rs2641530  | 0.42 | 0.42 | 0.7602 | 1.03 (0.84-1.27) | 0.39 | 0.39 | 0.4105 | 1.04 (0.95-1.14) | 0.39 | 0.37 |
| rs10459263 | 0.57 | 0.51 | 0.0198 | 1.28 (1.04-1.56) | 0.52 | 0.51 | 0.7800 | 1.01 (0.93-1.11) | 0.51 | 0.93 |
| rs11110393 | 0.19 | 0.18 | 0.4208 | 1.11 (0.86-1.45) | 0.18 | 0.19 | 0.7729 | 0.98 (0.88-1.10) | 0.19 | 0.04 |
| rs12317930 | 0.18 | 0.17 | 0.4804 | 1.10 (0.84-1.44) | 0.17 | 0.18 | 0.5657 | 0.97 (0.86-1.09) | 0.18 | 0.05 |
| rs12430111 | 0.38 | 0.35 | 0.2361 | 1.11 (0.93-1.32) | 0.33 | 0.31 | 0.0590 | 1.10 (1.00-1.21) | 0.31 | 0.42 |
| rs1336679  | 0.56 | 0.58 | 0.6201 | 0.94 (0.77-1.16) | 0.53 | 0.51 | 0.0676 | 1.09 (1.00-1.19) | 0.51 | 0.26 |
| rs7338279  | 0.74 | 0.74 | 0.8860 | 1.02 (0.81-1.28) | 0.71 | 0.71 | 0.8038 | 1.01 (0.92-1.12) | 0.71 | 0.71 |
| rs9601390  | 0.14 | 0.12 | 0.2259 | 1.21 (0.89-1.65) | 0.13 | 0.12 | 0.0803 | 1.12 (0.99-1.28) | 0.12 | 0.19 |
| rs8000037  | 0.49 | 0.49 | 0.9264 | 1.01 (0.82-1.24) | 0.50 | 0.48 | 0.0688 | 1.09 (0.99-1.19) | 0.48 | 0.35 |
| rs966724   | 0.19 | 0.18 | 0.5411 | 1.08 (0.83-1.41) | 0.19 | 0.17 | 0.0036 | 1.18 (1.05-1.32) | 0.17 | 0.38 |

|            |      |      |                        |                  |      |      |        |                  |      |      |
|------------|------|------|------------------------|------------------|------|------|--------|------------------|------|------|
| rs9555548  | 0.90 | 0.88 | 0.0926                 | 1.27 (0.96-1.67) | 0.87 | 0.87 | 0.8927 | 1.01 (0.89-1.14) | 0.87 | 0.44 |
| rs8013963  | 0.08 | 0.07 | 0.5843                 | 1.11 (0.75-1.65) | 0.06 | 0.07 | 0.3181 | 0.91 (0.76-1.09) | 0.07 | 0.18 |
| rs917607   | 0.03 | 0.01 | 0.0069                 | 2.36 (1.26-4.45) | 0.02 | 0.02 | 0.4917 | 0.89 (0.64-1.24) | 0.02 | 0.11 |
| rs72683475 | 0.03 | 0.01 | 0.0221                 | 2.68 (1.16-6.20) | 0.02 | 0.02 | 0.3666 | 1.15 (0.85-1.54) | 0.02 | 0.11 |
| rs78647847 | 0.90 | 0.87 | 0.1262                 | 1.30 (0.94-1.79) | 0.87 | 0.86 | 0.0415 | 1.15 (1.00-1.31) | 0.86 | 0.95 |
| rs1746586  | 0.78 | 0.75 | 0.2200                 | 1.16 (0.92-1.49) | 0.75 | 0.75 | 0.8859 | 1.01 (0.91-1.12) | 0.75 | 0.76 |
| rs4886647  | 0.48 | 0.50 | 0.5393                 | 0.94 (0.76-1.15) | 0.51 | 0.48 | 0.0120 | 1.12 (1.03-1.22) | 0.48 | 0.12 |
| rs4779128  | 0.17 | 0.14 | 0.0970                 | 1.26 (0.95-1.68) | 0.15 | 0.14 | 0.2794 | 1.07 (0.94-1.22) | 0.14 | 0.26 |
| rs12597065 | 0.26 | 0.22 | 0.0860                 | 1.23 (0.97-1.57) | 0.24 | 0.23 | 0.0801 | 1.10 (0.99-1.22) | 0.23 | 0.63 |
| rs7194974  | 0.73 | 0.70 | 0.3106                 | 1.12 (0.89-1.41) | 0.71 | 0.71 | 0.8132 | 0.99 (0.90-1.09) | 0.71 | 0.79 |
| rs4790838  | 0.41 | 0.39 | 0.6093                 | 1.06 (0.86-1.30) | 0.37 | 0.36 | 0.1841 | 1.06 (0.97-1.17) | 0.36 | 0.31 |
| rs2013260  | 0.66 | 0.66 | 0.9526                 | 0.99 (0.80-1.23) | 0.67 | 0.64 | 0.0192 | 1.12 (1.02-1.23) | 0.64 | 0.92 |
| rs623011   | 0.66 | 0.44 | $5.09 \times 10^{-23}$ | 2.50 (2.08-2.94) | 0.46 | 0.46 | 0.9771 | 1.00 (0.92-1.09) | 0.46 | 0.30 |
| rs17714860 | 0.88 | 0.78 | $1.35 \times 10^{-8}$  | 2.04 (1.61-2.56) | 0.80 | 0.79 | 0.7771 | 1.01 (0.92-1.12) | 0.79 | 0.57 |
| rs411079   | 0.79 | 0.66 | $3.68 \times 10^{-12}$ | 2.00 (1.64-2.44) | 0.67 | 0.67 | 0.6475 | 0.98 (0.90-1.07) | 0.67 | 0.75 |
| rs7222503  | 0.90 | 0.82 | $1.86 \times 10^{-7}$  | 2.00 (1.56-2.63) | 0.83 | 0.82 | 0.4752 | 1.04 (0.93-1.16) | 0.82 | 0.63 |
| rs312729   | 0.68 | 0.45 | $5.02 \times 10^{-25}$ | 2.50 (2.13-3.03) | 0.47 | 0.47 | 0.8718 | 1.00 (0.94-1.06) | 0.47 | 0.47 |
| rs312691   | 0.66 | 0.43 | $1.90 \times 10^{-25}$ | 2.56 (2.17-3.03) | 0.45 | 0.46 | 0.4918 | 0.97 (0.90-1.06) | 0.46 | 0.28 |
| rs12451295 | 0.63 | 0.48 | $1.57 \times 10^{-11}$ | 1.82 (1.52-2.13) | 0.48 | 0.49 | 0.6093 | 0.98 (0.90-1.06) | 0.49 | 0.35 |
| rs16975694 | 0.79 | 0.69 | $4.01 \times 10^{-7}$  | 1.64 (1.35-2.00) | 0.69 | 0.69 | 0.4574 | 0.97 (0.89-1.06) | 0.69 | 0.73 |
| rs16975792 | 0.68 | 0.56 | $6.68 \times 10^{-8}$  | 1.64 (1.37-1.96) | 0.56 | 0.57 | 0.4648 | 0.97 (0.89-1.05) | 0.57 | 0.31 |
| rs1605750  | 0.77 | 0.68 | $1.89 \times 10^{-6}$  | 1.59 (1.32-1.92) | 0.68 | 0.69 | 0.5737 | 0.98 (0.89-1.07) | 0.69 | 0.55 |
| rs62069783 | 0.69 | 0.59 | $4.51 \times 10^{-6}$  | 1.52 (1.27-1.82) | 0.60 | 0.60 | 0.8251 | 0.99 (0.91-1.08) | 0.60 | 0.22 |
| rs2109051  | 0.92 | 0.88 | 0.0150                 | 1.52 (1.09-2.13) | 0.88 | 0.88 | 0.8021 | 0.98 (0.86-1.13) | 0.88 | 0.69 |
| rs2713969  | 0.42 | 0.40 | 0.6124                 | 1.06 (0.86-1.30) | 0.38 | 0.37 | 0.3337 | 1.05 (0.95-1.15) | 0.37 | 0.71 |
| rs4595868  | 0.23 | 0.19 | 0.0094                 | 1.32 (1.08-1.62) | 0.20 | 0.19 | 0.3387 | 1.05 (0.95-1.17) | 0.19 | 0.22 |
| rs7235371  | 0.49 | 0.41 | 0.0003                 | 1.37 (1.16-1.63) | 0.42 | 0.42 | 0.6916 | 1.02 (0.94-1.11) | 0.42 | 0.52 |
| rs2423166  | 0.16 | 0.13 | 0.1410                 | 1.25 (0.93-1.67) | 0.13 | 0.13 | 0.8610 | 0.99 (0.87-1.13) | 0.13 | 0.19 |
| rs4239695  | 0.29 | 0.27 | 0.4795                 | 1.09 (0.87-1.36) | 0.29 | 0.27 | 0.2690 | 1.06 (0.96-1.17) | 0.27 | 0.53 |
| rs1570530  | 0.06 | 0.07 | 0.5235                 | 0.87 (0.57-1.32) | 0.06 | 0.05 | 0.0523 | 1.21 (1.00-1.46) | 0.05 | 0.52 |
| rs1993668  | 0.07 | 0.07 | 0.9990                 | 1.00 (0.67-1.48) | 0.06 | 0.06 | 0.8505 | 1.02 (0.84-1.23) | 0.06 | 0.51 |
| rs133501   | 0.56 | 0.53 | 0.3345                 | 1.11 (0.90-1.37) | 0.53 | 0.53 | 0.7845 | 0.99 (0.90-1.08) | 0.53 | 0.20 |



**eTable 3. Association results with TPP in the initial genome-wide scan and the second-stage analysis for the 34 GD risk SNPs**

| Chr | SNP              | BP        | Annotated Genes          | Alleles | TPPvsControl Discovery (171 vs 2,160) |        |                       |                  | TPPvsControl Replication (362 vs 1,089) |        |                        |                  |
|-----|------------------|-----------|--------------------------|---------|---------------------------------------|--------|-----------------------|------------------|-----------------------------------------|--------|------------------------|------------------|
|     |                  |           |                          |         | F_TPP                                 | F_Cons | P-value               | OR (95% CI)      | F_TPP                                   | F_Cons | P-value                | OR (95% CI)      |
| 1   | rs2843403        | 2529097   | <i>MMEL1</i>             | C/T     | 0.61                                  | 0.51   | 0.0003                | 1.52 (1.21-1.90) | 0.54                                    | 0.54   | 0.7879                 | 1.02 (0.86-1.21) |
| 1   | rs11590198       | 2551900   | <i>MMEL1</i>             | G/A     | 0.64                                  | 0.53   | 0.0002                | 1.55 (1.23-1.94) | 0.57                                    | 0.56   | 0.7116                 | 1.03 (0.87-1.22) |
| 1   | rs4648661        | 2568425   | <i>MMEL1/TTC34</i>       | C/T     | 0.53                                  | 0.43   | 0.0001                | 1.53 (1.23-1.91) | 0.47                                    | 0.44   | 0.1733                 | 1.12 (0.95-1.33) |
| 1   | rs3761959        | 157669278 | <i>FCRL3</i>             | T/C     | 0.45                                  | 0.40   | 0.0448                | 1.25 (1.01-1.56) | 0.47                                    | 0.41   | 0.0013                 | 1.29 (1.10-1.50) |
| 1   | rs1265883        | 160464911 | <i>SLAMF6</i>            | C/A     | 0.13                                  | 0.11   | 0.2339                | 1.22 (0.88-1.70) | 0.13                                    | 0.09   | 0.0061                 | 1.38 (1.10-1.73) |
| 2   | rs1881145        | 12634278  | <i>TRIB2/LPIN1</i>       | A/T     | 0.68                                  | 0.60   | 0.0020                | 1.47 (1.15-1.86) | 0.67                                    | 0.60   | 0.0006                 | 1.35 (1.14-1.60) |
| 2   | rs1534422        | 12640741  | <i>TRIB2/LPIN1</i>       | G/A     | 0.27                                  | 0.24   | 0.2373                | 1.16 (0.91-1.49) | 0.25                                    | 0.24   | 0.5654                 | 1.06 (0.87-1.29) |
| 2   | rs4669857        | 12658305  | <i>TRIB2/LPIN1</i>       | A/T     | 0.62                                  | 0.58   | 0.1581                | 1.18 (0.94-1.48) | 0.61                                    | 0.58   | 0.1606                 | 1.12 (0.95-1.32) |
| 2   | rs1024161        | 204721752 | <i>CTLA4/CD28</i>        | T/C     | 0.76                                  | 0.67   | 0.0002                | 1.61 (1.25-2.09) | 0.73                                    | 0.69   | 0.0478                 | 1.19 (1.00-1.41) |
| 3   | rs13093110       | 188125120 | <i>LPP</i>               | C/T     | 0.40                                  | 0.39   | 0.8287                | 1.03 (0.82-1.28) | 0.35                                    | 0.40   | 0.0113                 | 0.81 (0.69-0.95) |
| 3   | rs6806091        | 188237765 | <i>LPP</i>               | C/G     | 0.19                                  | 0.18   | 0.6106                | 1.07 (0.81-1.42) | 0.21                                    | 0.18   | 0.1208                 | 1.17 (0.96-1.43) |
| 4   | rs6832151        | 40303633  | <i>CHRNA9/RHOH</i>       | G/T     | 0.45                                  | 0.35   | 0.0003                | 1.51 (1.21-1.88) | 0.40                                    | 0.35   | 0.0112                 | 1.22 (1.05-1.43) |
| 5   | rs1368408        | 147258162 | <i>SCGB3A2/SPINK1</i>    | A/G     | 0.21                                  | 0.20   | 0.5407                | 1.09 (0.83-1.42) | 0.19                                    | 0.19   | 0.7122                 | 1.04 (0.84-1.29) |
| 6   | <b>rs4947296</b> | 31058178  | <i>C6orf15/PBMUCL1</i>   | C/T     | 0.27                                  | 0.15   | $1.99 \times 10^{-8}$ | 2.07 (1.61-2.66) | 0.25                                    | 0.14   | $1.38 \times 10^{-13}$ | 2.05 (1.70-2.46) |
| 6   | <b>rs1521</b>    | 31350704  | <i>MICA/HLA-B</i>        | T/C     | 0.90                                  | 0.83   | 0.0013                | 1.80 (1.27-2.57) | 0.92                                    | 0.79   | $4.36 \times 10^{-16}$ | 3.04 (2.30-4.00) |
| 6   | rs6903608        | 32428285  | <i>HLA-DRA/HLA-DRB5</i>  | C/T     | 0.37                                  | 0.37   | 0.8766                | 1.02 (0.81-1.28) | 0.44                                    | 0.38   | 0.0027                 | 1.27 (1.09-1.49) |
| 6   | <b>rs6457617</b> | 32663851  | <i>HLA-DQB1/HLA-DQA2</i> | T/C     | 0.64                                  | 0.49   | $1.55 \times 10^{-7}$ | 1.84 (1.47-2.31) | 0.58                                    | 0.45   | $4.35 \times 10^{-11}$ | 1.69 (1.44-1.97) |
| 6   | <b>rs2281388</b> | 33060118  | <i>HLA-DPBI/COL11A2</i>  | A/G     | 0.48                                  | 0.33   | $3.80 \times 10^{-8}$ | 1.82 (1.46-2.27) | 0.46                                    | 0.33   | $4.00 \times 10^{-12}$ | 1.71 (1.47-1.99) |
| 6   | rs2474619        | 90880035  | <i>BACH2</i>             | A/C     | 0.66                                  | 0.62   | 0.1954                | 1.17 (0.93-1.47) | 0.69                                    | 0.54   | 0.0119                 | 1.88 (1.59-2.21) |
| 6   | rs9355610        | 167383075 | <i>RNASET2/FGFR10P</i>   | G/A     | 0.55                                  | 0.47   | 0.0019                | 1.41 (1.13-1.76) | 0.51                                    | 0.47   | 0.0275                 | 1.19 (1.02-1.39) |
| 8   | rs2294025        | 134145512 | <i>TG</i>                | A/G     | 0.22                                  | 0.18   | 0.0504                | 1.30 (1.00-1.70) | 0.22                                    | 0.20   | 0.1175                 | 1.16 (0.96-1.39) |
| 8   | rs4736437        | 134185668 | <i>WISPI/SLA</i>         | G/T     | 0.22                                  | 0.19   | 0.1161                | 1.23 (0.95-1.61) | 0.23                                    | 0.21   | 0.2201                 | 1.12 (0.94-1.34) |
| 9   | rs505922         | 136149229 | <i>ABO</i>               | T/C     | 0.55                                  | 0.53   | 0.3858                | 1.10 (0.88-1.38) | 0.59                                    | 0.54   | 0.0057                 | 1.24 (1.07-1.45) |
| 11  | rs12575636       | 95311260  | <i>FAM76B/SESN3</i>      | G/T     | 0.12                                  | 0.09   | 0.1319                | 1.31 (0.92-1.85) | 0.11                                    | 0.08   | 0.0158                 | 1.38 (1.06-1.78) |
| 11  | rs4409785        | 95311422  | <i>FAM76B/SESN3</i>      | C/T     | 0.12                                  | 0.09   | 0.0855                | 1.35 (0.96-1.90) | 0.11                                    | 0.09   | 0.0619                 | 1.30 (0.99-1.72) |
| 12  | rs4768412        | 42869140  | <i>PRICKLE1</i>          | T/C     | 0.30                                  | 0.23   | 0.0092                | 1.39 (1.09-1.77) | 0.24                                    | 0.22   | 0.4834                 | 1.07 (0.88-1.31) |
| 14  | rs12101261       | 81451229  | <i>TSHR</i>              | T/C     | 0.66                                  | 0.64   | 0.3663                | 1.11 (0.88-1.40) | 0.70                                    | 0.64   | 0.0009                 | 1.32 (1.12-1.56) |
| 14  | rs1456988        | 98488007  | <i>C14orf177/VRK1</i>    | G/T     | 0.59                                  | 0.53   | 0.0283                | 1.28 (1.02-1.59) | 0.54                                    | 0.53   | 0.7502                 | 1.02 (0.88-1.19) |
| 16  | rs57348955       | 31185882  | <i>FUS/PRSS36</i>        | G/A     | 0.22                                  | 0.21   | 0.7188                | 1.05 (0.80-1.39) | 0.23                                    | 0.20   | 0.1243                 | 1.18 (0.96-1.44) |
| 16  | rs4423435        | 31560603  | <i>AHSP/ZNF720</i>       | G/A     | 0.54                                  | 0.52   | 0.3930                | 1.10 (0.88-1.38) | 0.55                                    | 0.54   | 0.5818                 | 1.05 (0.89-1.23) |
| 20  | rs1883832        | 44746982  | <i>CD40</i>              | C/T     | 0.67                                  | 0.64   | 0.2474                | 1.15 (0.91-1.45) | 0.68                                    | 0.64   | 0.0499                 | 1.18 (1.00-1.39) |
| 22  | rs229527         | 37581485  | <i>C1QTNF6</i>           | A/C     | 0.77                                  | 0.70   | 0.0102                | 1.40 (1.08-1.81) | 0.70                                    | 0.71   | 0.4250                 | 0.93 (0.79-1.10) |
| 22  | rs2284038        | 37635055  | <i>RAC2</i>              | A/G     | 0.65                                  | 0.63   | 0.6228                | 1.06 (0.84-1.35) | 0.63                                    | 0.63   | 0.8236                 | 0.98 (0.84-1.15) |
| 23  | rs5912838        | 78497118  | <i>GPR174/ITM2A</i>      | A/C     | 0.68                                  | 0.58   | 0.0025                | 1.50 (1.10-2.07) | 0.70                                    | 0.58   | $1.31 \times 10^{-5}$  | 1.68 (1.36-2.07) |

Chr., chromosome; SNP, single nucleotide polymorphism; BP, base position; F, minor allele frequency; TPP, thyrotoxic hypokalemic periodic paralysis; Cons, controls; GD, Graves' disease; OR, odds ratio; CI, confidence interval. SNPs with fold met the the Bonferroni-corrected significance level in the combined populations.

Continued eTable 3

| SNP              | TPPvsControl Combined (533 vs 3,249) |        |                        |                  |                          |           | TPP VS GD (533 TPP vs 5,160 GD) |      |                       |                  |
|------------------|--------------------------------------|--------|------------------------|------------------|--------------------------|-----------|---------------------------------|------|-----------------------|------------------|
|                  | F_TPP                                | F_Cons | P-value                | OR (95% CI)      | Breslow-Day Test P-value | Power (%) | F_TPP                           | F_GD | P-value               | OR (95% CI)      |
| rs2843403        | 0.56                                 | 0.52   | 0.0138                 | 1.20 (1.06-1.37) | 0.0058                   | 0.3       | 0.57                            | 0.54 | 0.2241                | 1.09 (0.95-1.26) |
| rs11590198       | 0.59                                 | 0.54   | 0.0090                 | 1.22 (1.07-1.39) | 0.0053                   | 0.6       | 0.59                            | 0.58 | 0.4357                | 1.06 (0.92-1.22) |
| rs4648661        | 0.49                                 | 0.43   | 0.0007                 | 1.26 (1.10-1.45) | 0.0286                   | 3.2       | 0.49                            | 0.46 | 0.7034                | 1.03 (0.87-1.22) |
| rs3761959        | 0.47                                 | 0.40   | 0.0002                 | 1.28 (1.12-1.45) | 0.8443                   | 4.1       | 0.47                            | 0.45 | 0.3619                | 1.06 (0.93-1.20) |
| rs1265883        | 0.13                                 | 0.10   | 0.0031                 | 1.33 (1.10-1.60) | 0.5602                   | 0.6       | 0.13                            | 0.12 | 0.7397                | 1.03 (0.86-1.25) |
| rs1881145        | 0.68                                 | 0.60   | $3.25 \times 10^{-6}$  | 1.39 (1.21-1.60) | 0.5796                   | 23.1      | 0.67                            | 0.63 | 0.0150                | 1.24 (1.08-1.43) |
| rs1534422        | 0.26                                 | 0.24   | 0.2412                 | 1.10 (0.94-1.28) | 0.5682                   | 0.0       | 0.26                            | 0.23 | 0.1063                | 1.14 (0.97-1.35) |
| rs4669857        | 0.61                                 | 0.58   | 0.0501                 | 1.14 (1.00-1.30) | 0.7215                   | 0.0       | 0.61                            | 0.61 | 0.7297                | 0.98 (0.86-1.12) |
| rs1024161        | 0.74                                 | 0.68   | 0.0002                 | 1.31 (1.14-1.51) | 0.0506                   | 3.5       | 0.74                            | 0.74 | 0.7871                | 0.98 (0.85-1.13) |
| rs13093110       | 0.37                                 | 0.40   | 0.0519                 | 0.88 (0.77-1.00) | 0.0975                   | 0.0       | 0.37                            | 0.38 | 0.4590                | 0.95 (0.83-1.09) |
| rs6806091        | 0.20                                 | 0.18   | 0.1187                 | 1.14 (0.97-1.34) | 0.6233                   | 0.0       | 0.20                            | 0.19 | 0.3341                | 1.10 (0.91-1.33) |
| rs6832151        | 0.42                                 | 0.35   | $3.07 \times 10^{-5}$  | 1.31 (1.15-1.49) | 0.1327                   | 7.2       | 0.42                            | 0.40 | 0.2811                | 1.07 (0.94-1.22) |
| rs1368408        | 0.20                                 | 0.19   | 0.5022                 | 1.06 (0.90-1.25) | 0.7973                   | 0.0       | 0.20                            | 0.23 | 0.0482                | 0.85 (0.73-1.00) |
| <b>rs4947296</b> | 0.26                                 | 0.14   | $3.08 \times 10^{-22}$ | 2.06 (1.77-2.39) | 0.9366                   | 100.0     | 0.26                            | 0.21 | 0.0011                | 1.28 (1.11-1.48) |
| <b>rs1521</b>    | 0.91                                 | 0.81   | $3.63 \times 10^{-18}$ | 2.51 (2.02-3.13) | 0.0222                   | 100.0     | 0.91                            | 0.88 | 0.0012                | 1.45 (1.16-1.81) |
| rs6903608        | 0.42                                 | 0.38   | 0.0102                 | 1.18 (1.04-1.35) | 0.1126                   | 0.2       | 0.42                            | 0.45 | 0.0644                | 0.89 (0.78-1.01) |
| <b>rs6457617</b> | 0.60                                 | 0.47   | $2.37 \times 10^{-17}$ | 1.74 (1.53-1.97) | 0.5321                   | 99.6      | 0.60                            | 0.47 | $5.35 \times 10^{-5}$ | 0.76 (0.67-0.87) |
| <b>rs2281388</b> | 0.46                                 | 0.33   | $2.46 \times 10^{-18}$ | 1.74 (1.54-1.98) | 0.6573                   | 99.7      | 0.46                            | 0.44 | 0.1111                | 1.09 (0.96-1.24) |
| rs2474619        | 0.68                                 | 0.57   | 0.0049                 | 1.58 (1.38-1.81) | 0.7114                   | 4.4       | 0.68                            | 0.66 | 0.2623                | 1.08 (0.94-1.23) |
| rs9355610        | 0.52                                 | 0.47   | 0.0004                 | 1.26 (1.11-1.43) | 0.2026                   | 2.5       | 0.52                            | 0.49 | 0.4178                | 0.95 (0.84-1.08) |
| rs2294025        | 0.22                                 | 0.19   | 0.0174                 | 1.20 (1.03-1.39) | 0.4660                   | 0.0       | 0.22                            | 0.22 | 0.7658                | 1.02 (0.88-1.19) |
| rs4736437        | 0.23                                 | 0.20   | 0.0601                 | 1.15 (0.99-1.34) | 0.5500                   | 0.0       | 0.23                            | 0.23 | 0.8697                | 0.99 (0.85-1.15) |
| rs505922         | 0.58                                 | 0.53   | 0.0054                 | 1.19 (1.05-1.35) | 0.3819                   | 0.2       | 0.58                            | 0.56 | 0.4909                | 1.05 (0.92-1.19) |
| rs12575636       | 0.11                                 | 0.09   | 0.0045                 | 1.35 (1.10-1.66) | 0.8147                   | 0.2       | 0.11                            | 0.11 | 0.9313                | 0.99 (0.77-1.27) |
| rs4409785        | 0.11                                 | 0.09   | 0.0115                 | 1.32 (1.06-1.64) | 0.8698                   | 0.1       | 0.11                            | 0.11 | 0.7157                | 1.04 (0.83-1.31) |
| rs4768412        | 0.26                                 | 0.23   | 0.0293                 | 1.19 (1.02-1.38) | 0.1100                   | 0.0       | 0.26                            | 0.23 | 0.0509                | 1.18 (1.00-1.38) |
| rs12101261       | 0.69                                 | 0.64   | 0.0013                 | 1.25 (1.09-1.43) | 0.2413                   | 1.1       | 0.69                            | 0.71 | 0.2199                | 0.92 (0.80-1.05) |
| rs1456988        | 0.55                                 | 0.53   | 0.1385                 | 1.10 (0.97-1.24) | 0.1091                   | 0.0       | 0.55                            | 0.56 | 0.6358                | 0.97 (0.86-1.10) |
| rs57348955       | 0.23                                 | 0.21   | 0.1378                 | 1.13 (0.96-1.33) | 0.5237                   | 0.0       | 0.23                            | 0.21 | 0.3113                | 1.11 (0.91-1.35) |
| rs4423435        | 0.55                                 | 0.53   | 0.3416                 | 1.08 (0.95-1.23) | 0.7097                   | 0.0       | 0.55                            | 0.54 | 0.5288                | 1.04 (0.91-1.19) |
| rs1883832        | 0.67                                 | 0.64   | 0.0209                 | 1.17 (1.02-1.34) | 0.8578                   | 0.1       | 0.67                            | 0.68 | 0.8347                | 0.99 (0.86-1.13) |
| rs229527         | 0.72                                 | 0.71   | 0.4323                 | 1.05 (0.92-1.21) | 0.0102                   | 0.0       | 0.72                            | 0.76 | 0.0164                | 0.84 (0.73-0.97) |
| rs2284038        | 0.64                                 | 0.63   | 0.9324                 | 1.01 (0.88-1.15) | 0.5935                   | 0.0       | 0.64                            | 0.66 | 0.0896                | 0.89 (0.78-1.02) |

|           |      |      |                       |                  |        |      |      |      |        |                  |
|-----------|------|------|-----------------------|------------------|--------|------|------|------|--------|------------------|
| rs5912838 | 0.69 | 0.58 | $5.91 \times 10^{-8}$ | 1.62 (1.36-1.93) | 0.5791 | 92.4 | 0.69 | 0.64 | 0.4439 | 1.25 (1.05-1.49) |
|-----------|------|------|-----------------------|------------------|--------|------|------|------|--------|------------------|

| <b>eTable 4 Clinical and laboratory features of 537 TPP Patients</b> |                        |               |
|----------------------------------------------------------------------|------------------------|---------------|
| <b>Study</b>                                                         | <b>Reference range</b> | <b>Result</b> |
| <b>Clinical feature</b>                                              |                        |               |
| Gender (male/female)                                                 | NA                     | 458 : 79      |
| Age (years)                                                          | NA                     | 34.8 ± 11.1   |
| Age of onset (years)                                                 | NA                     | 32.2 ± 11.0   |
| BMI (kg/m <sup>2</sup> )                                             | 18.5-24.9              | 23.3 ± 3.5    |
| <b>Plasma</b>                                                        |                        |               |
| TSH (mIU/ml)                                                         | 0.35-4.94              | 0.3 ± 0.7     |
| free Tri-iodothyronine (pmol/L)                                      | 2.63-5.70              | 15.8 ± 12.1   |
| Free thyroxine (pmol/L)                                              | 9.01-19.04             | 45.9 ± 44.4   |
| Initial K (mmol/l)                                                   | 3.5-5.1                | 2.1 ± 0.5     |
| TRAb (IU/L)                                                          | 0-1.75                 | 17.4 ± 26.3   |
| TPOAb (U/mL)                                                         | 0-60                   | 462.9 ± 471.4 |
| <b>No. of Seizures</b>                                               | <b>No. of patients</b> | <b>%</b>      |
| <3                                                                   | 322                    | 56            |
| 3-5                                                                  | 199                    | 34            |
| >5                                                                   | 56                     | 10            |
| <b>Causes of Seizures</b>                                            |                        |               |
| Yes                                                                  | 302                    | 52            |
| No                                                                   | 275                    | 48            |
| <b>Pattern</b>                                                       |                        |               |
| Paraplegia                                                           | 339                    | 59            |
| Quadriplegia                                                         | 230                    | 40            |
| Paraplegia/Quadriplegia                                              | 8                      | 1             |

TPP, thyrotoxic hypokalemic periodic paralysis; BMI, body mass index; TSH, thyroid stimulating hormone; K, potassium; TRAb, thyroid stimulating hormone receptor antibody; TPOAb, thyroid peroxidase antibody; TGAb, thyroglobulin antibody.

**eTable 5. TPP association results for the imputed and typed SNPs in the 4q31.3 region in the initial genome-wide scan**

| SNP         | BP        | Alleles | MAF_TPP | MAF_Controls | P      | OR (95%CI)       |
|-------------|-----------|---------|---------|--------------|--------|------------------|
| rs2404916   | 154995463 | A/G     | 0.43    | 0.48         | 0.1067 | 0.83 (0.67-1.04) |
| rs1316990   | 154995958 | T/C     | 0.38    | 0.34         | 0.1704 | 1.17 (0.93-1.47) |
| rs9307919   | 155000585 | C/T     | 0.25    | 0.29         | 0.0784 | 0.80 (0.62-1.03) |
| rs56668364  | 155003037 | T/C     | 0.01    | 0.02         | 0.4930 | 0.70 (0.26-1.94) |
| rs76048878  | 155004764 | C/T     | 0.01    | 0.02         | 0.4930 | 0.70 (0.26-1.94) |
| rs79349629  | 155006701 | T/C     | 0.01    | 0.02         | 0.4930 | 0.70 (0.26-1.94) |
| rs17372515  | 155007632 | A/G     | 0.07    | 0.07         | 0.6763 | 1.09 (0.72-1.67) |
| rs79090748  | 155009728 | A/C     | 0.01    | 0.02         | 0.4365 | 0.67 (0.24-1.85) |
| rs140086160 | 155010519 | C/T     | 0.01    | 0.02         | 0.4365 | 0.67 (0.24-1.85) |
| rs17031138  | 155013194 | T/C     | 0.36    | 0.34         | 0.4016 | 1.10 (0.88-1.38) |
| rs4328897   | 155014356 | A/C     | 0.22    | 0.24         | 0.2780 | 0.86 (0.66-1.13) |
| rs6830300   | 155015920 | A/G     | 0.45    | 0.42         | 0.3494 | 1.11 (0.89-1.39) |
| rs6837242   | 155017153 | G/A     | 0.23    | 0.25         | 0.3105 | 0.87 (0.67-1.14) |
| rs4266272   | 155018810 | C/T     | 0.46    | 0.43         | 0.2870 | 1.13 (0.90-1.40) |
| rs72737552  | 155019234 | C/T     | 0.30    | 0.30         | 0.9582 | 0.99 (0.78-1.26) |
| rs4491994   | 155019886 | T/C     | 0.45    | 0.43         | 0.3245 | 1.12 (0.90-1.39) |
| rs13114220  | 155020516 | A/G     | 0.22    | 0.25         | 0.3059 | 0.87 (0.67-1.13) |
| rs12651074  | 155021115 | C/T     | 0.46    | 0.43         | 0.2458 | 1.14 (0.91-1.42) |
| rs79971659  | 155021201 | G/A     | 0.01    | 0.02         | 0.4371 | 0.67 (0.24-1.85) |
| rs74411393  | 155022684 | A/G     | 0.01    | 0.02         | 0.4371 | 0.67 (0.24-1.85) |
| rs4389552   | 155023943 | G/A     | 0.46    | 0.43         | 0.2877 | 1.13 (0.90-1.40) |
| rs145213675 | 155024432 | A/G     | 0.30    | 0.30         | 0.9932 | 1.00 (0.79-1.27) |
| rs75098752  | 155025088 | C/T     | 0.23    | 0.25         | 0.3033 | 0.87 (0.67-1.13) |
| rs6856560   | 155025315 | A/G     | 0.47    | 0.44         | 0.3831 | 1.10 (0.88-1.37) |
| rs138489403 | 155025396 | G/T     | 0.45    | 0.43         | 0.3065 | 1.12 (0.90-1.40) |
| rs57349224  | 155026052 | A/G     | 0.30    | 0.30         | 0.9905 | 1.00 (0.79-1.27) |
| rs78639855  | 155026661 | A/G     | 0.01    | 0.02         | 0.4376 | 0.67 (0.24-1.85) |
| rs143958276 | 155026663 | A/G     | 0.01    | 0.02         | 0.4376 | 0.67 (0.24-1.85) |
| rs72737554  | 155027462 | G/A     | 0.30    | 0.30         | 0.9876 | 1.00 (0.79-1.27) |
| rs142735742 | 155027546 | C/T     | 0.01    | 0.02         | 0.4376 | 0.67 (0.24-1.85) |
| rs1878448   | 155027927 | A/G     | 0.47    | 0.44         | 0.3562 | 1.11 (0.89-1.38) |
| rs184103999 | 155028968 | A/G     | 0.01    | 0.02         | 0.4376 | 0.67 (0.24-1.85) |
| rs79276288  | 155028969 | G/A     | 0.01    | 0.02         | 0.4183 | 0.66 (0.24-1.82) |
| rs75462484  | 155029113 | A/G     | 0.09    | 0.08         | 0.6025 | 1.11 (0.75-1.64) |
| rs61296553  | 155029782 | G/A     | 0.45    | 0.43         | 0.2999 | 1.12 (0.90-1.40) |
| rs147376737 | 155030274 | G/T     | 0.01    | 0.02         | 0.4376 | 0.67 (0.24-1.85) |
| rs146575547 | 155031340 | A/G     | 0.30    | 0.30         | 0.9947 | 1.00 (0.79-1.27) |
| rs191149851 | 155034593 | G/A     | 0.01    | 0.02         | 0.4376 | 0.67 (0.24-1.85) |
| rs116684133 | 155035244 | G/A     | 0.46    | 0.43         | 0.2543 | 1.14 (0.91-1.42) |
| rs148736458 | 155035277 | G/T     | 0.45    | 0.43         | 0.3003 | 1.12 (0.90-1.40) |
| rs111476154 | 155036071 | T/C     | 0.36    | 0.34         | 0.5378 | 1.07 (0.85-1.35) |
| rs72737556  | 155036550 | C/T     | 0.30    | 0.30         | 0.9818 | 1.00 (0.79-1.27) |
| rs17031143  | 155036794 | G/A     | 0.45    | 0.43         | 0.3183 | 1.12 (0.90-1.39) |
| rs78276196  | 155037495 | A/C     | 0.09    | 0.08         | 0.5813 | 1.12 (0.75-1.65) |
| rs7686617   | 155039142 | C/T     | 0.30    | 0.30         | 0.9186 | 1.01 (0.80-1.29) |
| rs72721306  | 155039628 | C/T     | 0.30    | 0.30         | 0.9933 | 1.00 (0.79-1.27) |
| rs76832349  | 155039845 | T/C     | 0.09    | 0.08         | 0.5831 | 1.12 (0.75-1.65) |
| rs79850297  | 155040141 | T/C     | 0.01    | 0.02         | 0.5819 | 0.78 (0.31-1.93) |
| rs76600819  | 155040151 | A/G     | 0.01    | 0.02         | 0.5819 | 0.78 (0.31-1.93) |

|             |           |     |      |      |        |                  |
|-------------|-----------|-----|------|------|--------|------------------|
| rs72721307  | 155040332 | T/C | 0.30 | 0.30 | 0.9176 | 1.01 (0.80-1.29) |
| rs12643111  | 155040416 | T/G | 0.30 | 0.30 | 0.9133 | 1.01 (0.80-1.29) |
| rs4484280   | 155047033 | T/C | 0.44 | 0.46 | 0.4039 | 0.91 (0.73-1.14) |
| rs2014131   | 155047531 | T/C | 0.03 | 0.03 | 0.4541 | 0.77 (0.39-1.53) |
| rs938716    | 155049484 | T/C | 0.29 | 0.29 | 0.9814 | 1.00 (0.79-1.28) |
| rs10028852  | 155062069 | A/G | 0.13 | 0.13 | 0.9692 | 0.99 (0.72-1.38) |
| rs72721320  | 155062328 | T/C | 0.13 | 0.13 | 0.9874 | 1.00 (0.72-1.39) |
| rs10029174  | 155062442 | A/C | 0.13 | 0.13 | 0.9899 | 1.00 (0.72-1.39) |
| rs10776528  | 155062911 | T/G | 0.13 | 0.13 | 0.9294 | 1.02 (0.73-1.41) |
| rs58975189  | 155063442 | T/G | 0.13 | 0.13 | 0.9170 | 1.02 (0.73-1.41) |
| rs75111051  | 155066262 | G/T | 0.13 | 0.13 | 0.8309 | 1.04 (0.75-1.43) |
| rs4349583   | 155071789 | C/A | 0.14 | 0.13 | 0.8478 | 1.03 (0.75-1.42) |
| rs4432731   | 155080330 | T/C | 0.10 | 0.09 | 0.6634 | 1.09 (0.75-1.57) |
| rs76751686  | 155081233 | C/T | 0.09 | 0.11 | 0.2857 | 0.81 (0.55-1.19) |
| rs17031190  | 155083771 | A/G | 0.09 | 0.11 | 0.2413 | 0.79 (0.54-1.17) |
| rs17031193  | 155084367 | C/T | 0.09 | 0.11 | 0.2168 | 0.78 (0.53-1.16) |
| rs2897003   | 155084602 | C/T | 0.09 | 0.11 | 0.2216 | 0.79 (0.53-1.16) |
| rs17031199  | 155085018 | T/G | 0.09 | 0.11 | 0.1635 | 0.76 (0.52-1.12) |
| rs36123238  | 155085107 | A/G | 0.10 | 0.09 | 0.7242 | 1.07 (0.74-1.56) |
| rs17031202  | 155086743 | G/A | 0.09 | 0.11 | 0.2254 | 0.79 (0.54-1.16) |
| rs11728514  | 155114394 | C/T | 0.03 | 0.03 | 0.7245 | 1.11 (0.61-2.03) |
| rs6838705   | 155122349 | G/A | 0.10 | 0.13 | 0.1371 | 0.76 (0.53-1.09) |
| rs4393979   | 155123244 | G/A | 0.10 | 0.13 | 0.1058 | 0.74 (0.51-1.07) |
| rs113561709 | 155124385 | C/T | 0.14 | 0.13 | 0.7677 | 1.05 (0.76-1.45) |
| rs11099942  | 155132707 | T/C | 0.03 | 0.05 | 0.3595 | 0.76 (0.42-1.38) |
| rs4385038   | 155135688 | G/A | 0.24 | 0.27 | 0.3315 | 0.88 (0.68-1.14) |
| rs4425362   | 155138400 | C/T | 0.26 | 0.26 | 0.9570 | 0.99 (0.77-1.27) |
| rs79225578  | 155139560 | G/A | 0.06 | 0.08 | 0.1854 | 0.73 (0.46-1.16) |
| rs72968805  | 155143449 | C/T | 0.14 | 0.13 | 0.7773 | 1.05 (0.76-1.44) |
| rs75617643  | 155145504 | T/C | 0.07 | 0.09 | 0.1413 | 0.72 (0.47-1.12) |
| rs4696538   | 155146500 | A/G | 0.06 | 0.08 | 0.1793 | 0.73 (0.46-1.16) |
| rs151312587 | 155149413 | T/G | 0.06 | 0.08 | 0.1782 | 0.73 (0.46-1.16) |
| rs17031259  | 155150556 | A/C | 0.06 | 0.08 | 0.1789 | 0.73 (0.46-1.16) |
| rs9994961   | 155150764 | A/C | 0.06 | 0.08 | 0.1750 | 0.72 (0.45-1.15) |
| rs10029359  | 155150910 | T/C | 0.06 | 0.08 | 0.1750 | 0.72 (0.45-1.15) |
| rs74915192  | 155151440 | T/C | 0.14 | 0.13 | 0.6205 | 1.08 (0.79-1.49) |
| rs4283645   | 155152861 | T/G | 0.06 | 0.08 | 0.2055 | 0.74 (0.47-1.17) |
| rs10517589  | 155153299 | T/G | 0.06 | 0.08 | 0.1666 | 0.72 (0.45-1.15) |
| rs56020351  | 155153789 | C/A | 0.14 | 0.13 | 0.6884 | 1.07 (0.78-1.47) |
| rs6852506   | 155154654 | G/A | 0.14 | 0.13 | 0.6709 | 1.07 (0.78-1.47) |
| rs17031277  | 155155318 | A/G | 0.14 | 0.13 | 0.7470 | 1.05 (0.77-1.45) |
| rs7655799   | 155156207 | G/A | 0.21 | 0.23 | 0.5241 | 0.92 (0.70-1.20) |
| rs61746132  | 155156412 | A/G | 0.14 | 0.13 | 0.7539 | 1.05 (0.77-1.45) |
| rs61741046  | 155156542 | A/G | 0.03 | 0.04 | 0.2711 | 0.71 (0.38-1.32) |
| rs61743677  | 155157015 | C/T | 0.07 | 0.09 | 0.1822 | 0.75 (0.49-1.15) |
| rs6832477   | 155159162 | C/T | 0.07 | 0.09 | 0.2416 | 0.78 (0.51-1.19) |
| rs6535989   | 155161666 | C/T | 0.21 | 0.23 | 0.5422 | 0.92 (0.70-1.20) |
| rs3811737   | 155162154 | C/T | 0.07 | 0.09 | 0.2457 | 0.78 (0.51-1.19) |
| rs3811736   | 155162338 | A/G | 0.14 | 0.13 | 0.7383 | 1.06 (0.77-1.45) |
| rs11734901  | 155181767 | C/A | 0.51 | 0.47 | 0.1789 | 1.17 (0.94-1.45) |
| rs3828478   | 155182784 | G/A | 0.51 | 0.47 | 0.1602 | 1.17 (0.94-1.46) |
| rs11099944  | 155184454 | A/G | 0.51 | 0.47 | 0.2111 | 1.15 (0.92-1.44) |
| rs78718534  | 155184946 | G/A | 0.03 | 0.04 | 0.3533 | 0.72 (0.37-1.43) |
| rs11733437  | 155185893 | C/A | 0.51 | 0.47 | 0.2380 | 1.14 (0.92-1.43) |
| rs12643125  | 155186191 | T/C | 0.51 | 0.47 | 0.2380 | 1.14 (0.92-1.43) |



|            |           |     |      |      |                         |                  |
|------------|-----------|-----|------|------|-------------------------|------------------|
| rs12643173 | 155186399 | T/C | 0.51 | 0.47 | 0.2380                  | 1.14 (0.92-1.43) |
| rs6832806  | 155186976 | T/C | 0.46 | 0.49 | 0.3519                  | 0.90 (0.72-1.12) |
| rs11731663 | 155187341 | C/T | 0.51 | 0.47 | 0.2337                  | 1.15 (0.92-1.43) |
| rs12503824 | 155187756 | T/C | 0.03 | 0.04 | 0.3541                  | 0.72 (0.37-1.43) |
| rs10010151 | 155188381 | A/G | 0.46 | 0.49 | 0.3564                  | 0.90 (0.72-1.12) |
| rs12509842 | 155189006 | G/T | 0.03 | 0.04 | 0.3541                  | 0.72 (0.37-1.43) |
| rs28668156 | 155189123 | T/C | 0.46 | 0.49 | 0.3654                  | 0.90 (0.72-1.13) |
| rs28554124 | 155189297 | G/A | 0.46 | 0.49 | 0.3564                  | 0.90 (0.72-1.12) |
| rs7666541  | 155190818 | G/A | 0.51 | 0.47 | 0.2314                  | 1.15 (0.92-1.43) |
| rs4386584  | 155191451 | C/T | 0.51 | 0.47 | 0.2314                  | 1.15 (0.92-1.43) |
| rs11726850 | 155192017 | T/C | 0.51 | 0.47 | 0.2314                  | 1.15 (0.92-1.43) |
| rs11726919 | 155192201 | T/C | 0.51 | 0.47 | 0.2314                  | 1.15 (0.92-1.43) |
| rs4073438  | 155192424 | C/A | 0.03 | 0.04 | 0.3541                  | 0.72 (0.37-1.43) |
| rs4461508  | 155192697 | A/G | 0.03 | 0.04 | 0.4638                  | 0.78 (0.41-1.50) |
| rs4403033  | 155193315 | A/C | 0.51 | 0.47 | 0.2315                  | 1.15 (0.92-1.43) |
| rs4312742  | 155193398 | A/G | 0.51 | 0.47 | 0.2273                  | 1.15 (0.92-1.43) |
| rs7440122  | 155193767 | G/A | 0.51 | 0.47 | 0.1969                  | 1.16 (0.93-1.45) |
| rs4327464  | 155193969 | G/A | 0.51 | 0.47 | 0.2315                  | 1.15 (0.92-1.43) |
| rs35315598 | 155194424 | G/A | 0.51 | 0.47 | 0.2372                  | 1.14 (0.92-1.43) |
| rs4575978  | 155194629 | G/A | 0.51 | 0.47 | 0.2372                  | 1.14 (0.92-1.43) |
| rs12506449 | 155194975 | T/C | 0.03 | 0.04 | 0.5176                  | 0.81 (0.42-1.54) |
| rs4235240  | 155195014 | T/C | 0.03 | 0.04 | 0.4638                  | 0.78 (0.41-1.50) |
| rs4235241  | 155195184 | T/G | 0.51 | 0.47 | 0.2209                  | 1.15 (0.92-1.43) |
| rs80000145 | 155195762 | T/C | 0.02 | 0.03 | 0.3971                  | 0.73 (0.35-1.50) |
| rs6823540  | 155197891 | T/G | 0.23 | 0.23 | 0.7301                  | 0.96 (0.74-1.24) |
| rs72617460 | 155207953 | T/G | 0.11 | 0.11 | 0.7858                  | 0.95 (0.67-1.35) |
| rs12508314 | 155209159 | G/A | 0.11 | 0.11 | 0.7795                  | 0.95 (0.67-1.35) |
| rs10001032 | 155209964 | T/G | 0.52 | 0.49 | 0.2310                  | 1.15 (0.92-1.43) |
| rs11099948 | 155210418 | C/T | 0.52 | 0.49 | 0.2310                  | 1.15 (0.92-1.43) |
| rs67916370 | 155212484 | T/G | 0.11 | 0.12 | 0.7471                  | 0.94 (0.67-1.34) |
| rs67121281 | 155215027 | G/A | 0.11 | 0.12 | 0.7471                  | 0.94 (0.67-1.34) |
| rs72617461 | 155223374 | G/A | 0.11 | 0.12 | 0.7344                  | 0.94 (0.66-1.34) |
| rs12504514 | 155223519 | A/G | 0.11 | 0.12 | 0.7344                  | 0.94 (0.66-1.34) |
| rs67518652 | 155224423 | T/C | 0.11 | 0.12 | 0.7084                  | 0.94 (0.66-1.33) |
| rs4463049  | 155227275 | A/C | 0.11 | 0.12 | 0.6678                  | 0.93 (0.65-1.32) |
| rs4696546  | 155229324 | T/C | 0.52 | 0.49 | 0.2814                  | 1.13 (0.91-1.41) |
| rs4696547  | 155229503 | C/T | 0.52 | 0.49 | 0.2814                  | 1.13 (0.91-1.41) |
| rs4696205  | 155232591 | T/G | 0.52 | 0.49 | 0.2994                  | 1.12 (0.90-1.40) |
| rs6847387  | 155233170 | G/T | 0.38 | 0.39 | 0.4720                  | 0.92 (0.73-1.15) |
| rs72617462 | 155233521 | T/C | 0.11 | 0.12 | 0.6543                  | 0.92 (0.65-1.31) |
| rs12644248 | 155235392 | G/A | 0.11 | 0.12 | 0.6543                  | 0.92 (0.65-1.31) |
| rs66571236 | 155236548 | G/A | 0.11 | 0.12 | 0.6543                  | 0.92 (0.65-1.31) |
| rs12640050 | 155237904 | T/C | 0.11 | 0.12 | 0.6543                  | 0.92 (0.65-1.31) |
| rs13111065 | 155238342 | A/G | 0.52 | 0.49 | 0.2815                  | 1.13 (0.91-1.41) |
| rs56274873 | 155240057 | G/A | 0.30 | 0.35 | 0.0544                  | 0.79 (0.62-1.01) |
| rs10049695 | 155240256 | C/T | 0.22 | 0.14 | 3.01E-05                | 1.75 (1.34-2.29) |
| rs13132851 | 155241173 | G/A | 0.28 | 0.28 | 0.9790                  | 1.00 (0.79-1.28) |
| rs11935503 | 155241438 | A/G | 0.29 | 0.35 | 0.0517                  | 0.79 (0.62-1.00) |
| rs11935573 | 155241572 | A/G | 0.29 | 0.35 | 0.0513                  | 0.79 (0.62-1.00) |
| rs62331873 | 155242383 | T/C | 0.29 | 0.35 | 0.0517                  | 0.79 (0.62-1.00) |
| rs62331874 | 155242505 | T/G | 0.29 | 0.35 | 0.0517                  | 0.79 (0.62-1.00) |
| rs13109747 | 155243573 | C/T | 0.22 | 0.14 | 4.24 × 10 <sup>-5</sup> | 1.73 (1.33-2.26) |
| rs1352714  | 155243604 | T/C | 0.22 | 0.14 | 3.69 × 10 <sup>-5</sup> | 1.74 (1.33-2.27) |
| rs12500437 | 155244475 | G/T | 0.22 | 0.14 | 4.24 × 10 <sup>-5</sup> | 1.73 (1.33-2.26) |
| rs1490673  | 155244671 | T/G | 0.29 | 0.35 | 0.0506                  | 0.79 (0.62-1.00) |

|             |           |     |      |      |                       |                  |
|-------------|-----------|-----|------|------|-----------------------|------------------|
| rs6535994   | 155245198 | C/T | 0.22 | 0.14 | $4.24 \times 10^{-5}$ | 1.73 (1.33-2.26) |
| rs56214025  | 155245204 | A/G | 0.29 | 0.35 | 0.0506                | 0.79 (0.62-1.00) |
| rs1388084   | 155245811 | C/T | 0.22 | 0.14 | $4.24 \times 10^{-5}$ | 1.73 (1.33-2.26) |
| rs13131753  | 155246568 | C/T | 0.52 | 0.49 | 0.3038                | 1.12 (0.90-1.40) |
| rs9637650   | 155246673 | C/T | 0.22 | 0.14 | $3.76 \times 10^{-5}$ | 1.74 (1.33-2.27) |
| rs2896945   | 155247165 | T/C | 0.29 | 0.35 | 0.0476                | 0.79 (0.62-1.00) |
| rs2054962   | 155247235 | G/A | 0.52 | 0.49 | 0.3035                | 1.12 (0.90-1.40) |
| rs2130712   | 155247554 | C/A | 0.22 | 0.14 | $3.76 \times 10^{-5}$ | 1.74 (1.33-2.27) |
| rs7681523   | 155247884 | C/T | 0.52 | 0.49 | 0.3072                | 1.12 (0.90-1.40) |
| rs1388083   | 155248643 | C/T | 0.31 | 0.35 | 0.0858                | 0.81 (0.64-1.03) |
| rs1388082   | 155248664 | A/G | 0.21 | 0.14 | 0.0001                | 1.69 (1.29-2.22) |
| rs2054961   | 155248845 | G/T | 0.29 | 0.29 | 0.9691                | 1.01 (0.79-1.28) |
| rs2130711   | 155248922 | T/G | 0.21 | 0.14 | 0.0001                | 1.70 (1.29-2.23) |
| rs2404704   | 155249118 | C/T | 0.22 | 0.14 | $2.69 \times 10^{-5}$ | 1.76 (1.34-2.30) |
| rs12651681  | 155249362 | G/A | 0.11 | 0.11 | 0.7845                | 0.95 (0.67-1.35) |
| rs10517595  | 155251015 | T/G | 0.19 | 0.22 | 0.1915                | 0.83 (0.63-1.10) |
| rs2130710   | 155251785 | C/T | 0.31 | 0.35 | 0.0995                | 0.82 (0.65-1.04) |
| rs77300771  | 155253016 | C/T | 0.20 | 0.12 | 0.0001                | 1.73 (1.30-2.29) |
| rs118016158 | 155253393 | A/G | 0.19 | 0.12 | 0.0002                | 1.70 (1.28-2.26) |
| rs6858157   | 155256177 | G/A | 0.34 | 0.37 | 0.2334                | 0.87 (0.69-1.10) |
| rs1021381   | 155257709 | C/T | 0.34 | 0.38 | 0.2076                | 0.86 (0.68-1.09) |
| rs62331879  | 155258393 | T/C | 0.32 | 0.37 | 0.0885                | 0.82 (0.65-1.03) |
| rs6815049   | 155262171 | G/A | 0.34 | 0.38 | 0.1433                | 0.84 (0.67-1.06) |
| rs184685103 | 155262395 | T/C | 0.02 | 0.02 | 0.5605                | 1.24 (0.60-2.59) |
| rs189990891 | 155262450 | G/A | 0.02 | 0.02 | 0.5605                | 1.24 (0.60-2.59) |
| rs13112205  | 155266359 | T/C | 0.26 | 0.26 | 0.7871                | 0.97 (0.75-1.24) |
| rs13112673  | 155266439 | A/G | 0.26 | 0.26 | 0.7871                | 0.97 (0.75-1.24) |
| rs13113312  | 155266731 | T/G | 0.26 | 0.26 | 0.7909                | 0.97 (0.75-1.24) |
| rs11726534  | 155269311 | G/A | 0.33 | 0.37 | 0.1279                | 0.84 (0.66-1.05) |
| rs4696207   | 155269388 | A/C | 0.26 | 0.27 | 0.7287                | 0.96 (0.75-1.23) |
| rs7681342   | 155270460 | T/G | 0.26 | 0.27 | 0.9109                | 0.99 (0.77-1.26) |
| rs17031489  | 155273743 | G/A | 0.63 | 0.56 | 0.0058                | 1.37 (1.09-1.72) |
| rs10028929  | 155275122 | C/A | 0.13 | 0.12 | 0.4939                | 1.12 (0.81-1.55) |
| rs6844979   | 155275324 | T/C | 0.13 | 0.12 | 0.4876                | 1.12 (0.81-1.56) |
| rs1490675   | 155278862 | T/C | 0.13 | 0.12 | 0.5377                | 1.11 (0.80-1.54) |
| rs35132553  | 155279102 | A/C | 0.37 | 0.45 | 0.0053                | 0.73 (0.58-0.91) |
| rs13117053  | 155279294 | G/A | 0.13 | 0.12 | 0.5377                | 1.11 (0.80-1.54) |
| rs6536001   | 155281288 | A/G | 0.13 | 0.12 | 0.4678                | 1.13 (0.82-1.56) |
| rs7687041   | 155281772 | G/A | 0.13 | 0.12 | 0.4820                | 1.12 (0.81-1.55) |
| rs10017772  | 155287535 | C/T | 0.49 | 0.42 | 0.0117                | 1.32 (1.06-1.65) |
| rs6419274   | 155291868 | T/C | 0.10 | 0.09 | 0.5078                | 1.14 (0.78-1.65) |
| rs113280523 | 155292872 | T/G | 0.09 | 0.05 | 0.0005                | 1.98 (1.34-2.94) |
| rs4696553   | 155293079 | G/A | 0.10 | 0.09 | 0.5525                | 1.12 (0.77-1.62) |
| rs4696554   | 155293153 | C/T | 0.10 | 0.09 | 0.5004                | 1.13 (0.79-1.63) |
| rs11721758  | 155295076 | G/A | 0.39 | 0.36 | 0.3295                | 1.12 (0.89-1.40) |
| rs13111929  | 155296207 | A/G | 0.25 | 0.24 | 0.4682                | 1.10 (0.85-1.41) |
| rs6536003   | 155297245 | T/G | 0.10 | 0.09 | 0.6611                | 1.09 (0.75-1.58) |
| rs6815493   | 155297291 | A/G | 0.09 | 0.05 | 0.0016                | 1.86 (1.26-2.76) |
| rs6536004   | 155297559 | G/A | 0.27 | 0.28 | 0.5364                | 0.93 (0.72-1.19) |
| rs7688746   | 155297826 | T/C | 0.27 | 0.28 | 0.5314                | 0.92 (0.72-1.19) |
| rs72723371  | 155298050 | T/C | 0.17 | 0.19 | 0.2960                | 0.86 (0.64-1.15) |
| rs13101522  | 155298116 | T/C | 0.27 | 0.28 | 0.5321                | 0.92 (0.72-1.19) |
| rs66478552  | 155298773 | G/T | 0.17 | 0.19 | 0.3703                | 0.88 (0.66-1.17) |
| rs34503070  | 155299027 | C/T | 0.36 | 0.33 | 0.3320                | 1.12 (0.89-1.40) |
| rs4696555   | 155299203 | T/C | 0.17 | 0.19 | 0.3703                | 0.88 (0.66-1.17) |

|             |           |     |      |      |        |                  |
|-------------|-----------|-----|------|------|--------|------------------|
| rs6811038   | 155299346 | T/C | 0.27 | 0.28 | 0.5791 | 0.93 (0.73-1.20) |
| rs35687519  | 155299382 | T/G | 0.17 | 0.19 | 0.3621 | 0.87 (0.66-1.17) |
| rs13134088  | 155299483 | G/A | 0.17 | 0.19 | 0.3621 | 0.87 (0.66-1.17) |
| rs4696556   | 155300448 | T/C | 0.10 | 0.09 | 0.7077 | 1.08 (0.74-1.56) |
| rs17373342  | 155300546 | A/G | 0.17 | 0.19 | 0.3520 | 0.87 (0.65-1.16) |
| rs1388068   | 155300694 | G/A | 0.09 | 0.05 | 0.0017 | 1.86 (1.25-2.75) |
| rs1388069   | 155300870 | G/A | 0.17 | 0.19 | 0.3487 | 0.87 (0.65-1.16) |
| rs1388070   | 155300938 | A/G | 0.36 | 0.33 | 0.3451 | 1.11 (0.89-1.40) |
| rs4696557   | 155301247 | G/A | 0.27 | 0.28 | 0.5984 | 0.94 (0.73-1.20) |
| rs8180116   | 155301356 | A/G | 0.17 | 0.19 | 0.3487 | 0.87 (0.65-1.16) |
| rs1388071   | 155301686 | T/C | 0.10 | 0.09 | 0.6770 | 1.08 (0.75-1.57) |
| rs13125423  | 155301894 | T/C | 0.27 | 0.28 | 0.5694 | 0.93 (0.73-1.19) |
| rs8180151   | 155303100 | C/T | 0.10 | 0.09 | 0.6681 | 1.09 (0.75-1.58) |
| rs11733376  | 155303386 | A/G | 0.17 | 0.19 | 0.3811 | 0.88 (0.66-1.17) |
| rs4696558   | 155303802 | T/C | 0.17 | 0.19 | 0.3811 | 0.88 (0.66-1.17) |
| rs7674383   | 155304371 | A/G | 0.27 | 0.28 | 0.6260 | 0.94 (0.74-1.21) |
| rs35640569  | 155304448 | T/G | 0.17 | 0.19 | 0.3811 | 0.88 (0.66-1.17) |
| rs17301342  | 155305233 | T/C | 0.36 | 0.33 | 0.2899 | 1.13 (0.90-1.42) |
| rs34927139  | 155305491 | C/T | 0.36 | 0.33 | 0.2941 | 1.13 (0.90-1.42) |
| rs116156492 | 155306766 | G/A | 0.09 | 0.05 | 0.0013 | 1.89 (1.27-2.80) |
| rs12651672  | 155307037 | T/C | 0.24 | 0.27 | 0.2680 | 0.87 (0.67-1.12) |
| rs10857274  | 155307426 | C/T | 0.27 | 0.28 | 0.7746 | 0.97 (0.75-1.24) |
| rs17031541  | 155307651 | C/T | 0.09 | 0.05 | 0.0013 | 1.89 (1.27-2.80) |
| rs76410096  | 155309323 | A/G | 0.09 | 0.05 | 0.0026 | 1.83 (1.23-2.72) |
| rs60164156  | 155311757 | A/G | 0.09 | 0.05 | 0.0025 | 1.84 (1.23-2.74) |
| rs11099952  | 155311858 | C/T | 0.03 | 0.01 | 0.0328 | 2.07 (1.05-4.08) |
| rs57468943  | 155312212 | A/G | 0.09 | 0.05 | 0.0025 | 1.84 (1.23-2.74) |
| rs9992566   | 155312995 | T/C | 0.03 | 0.01 | 0.0363 | 2.04 (1.04-4.02) |
| rs17031566  | 155318412 | G/A | 0.24 | 0.27 | 0.2280 | 0.86 (0.66-1.11) |
| rs1388089   | 155318476 | T/G | 0.24 | 0.27 | 0.2250 | 0.85 (0.66-1.11) |
| rs7686473   | 155319043 | A/G | 0.24 | 0.27 | 0.2340 | 0.86 (0.66-1.11) |
| rs7693455   | 155320054 | G/A | 0.24 | 0.27 | 0.2297 | 0.86 (0.66-1.11) |
| rs76025992  | 155320428 | C/T | 0.09 | 0.05 | 0.0029 | 1.82 (1.22-2.71) |
| rs12647084  | 155321311 | C/A | 0.33 | 0.32 | 0.7444 | 1.04 (0.82-1.31) |
| rs6828604   | 155322112 | C/T | 0.23 | 0.27 | 0.2035 | 0.85 (0.65-1.10) |
| rs6811973   | 155322636 | T/C | 0.32 | 0.32 | 0.8705 | 1.02 (0.80-1.29) |
| rs147822301 | 155322882 | T/C | 0.09 | 0.05 | 0.0029 | 1.82 (1.22-2.71) |
| rs7349602   | 155323014 | T/C | 0.23 | 0.26 | 0.2051 | 0.85 (0.65-1.10) |
| rs13123721  | 155323951 | T/C | 0.24 | 0.27 | 0.2186 | 0.85 (0.66-1.10) |
| rs4696561   | 155324695 | C/T | 0.24 | 0.27 | 0.2203 | 0.85 (0.66-1.10) |
| rs6849220   | 155325049 | A/C | 0.09 | 0.05 | 0.0016 | 1.86 (1.26-2.76) |
| rs7697696   | 155326092 | T/C | 0.03 | 0.01 | 0.0322 | 2.07 (1.05-4.09) |
| rs11099953  | 155329567 | C/T | 0.23 | 0.26 | 0.2416 | 0.86 (0.66-1.11) |
| rs1490674   | 155330282 | T/C | 0.35 | 0.33 | 0.3256 | 1.12 (0.89-1.41) |
| rs59008095  | 155330652 | A/G | 0.09 | 0.05 | 0.0015 | 1.87 (1.26-2.78) |
| rs73854741  | 155331350 | G/A | 0.24 | 0.26 | 0.2648 | 0.87 (0.67-1.12) |
| rs28590354  | 155331351 | A/G | 0.03 | 0.01 | 0.0405 | 2.01 (1.02-3.95) |
| rs72968061  | 155331651 | G/A | 0.24 | 0.26 | 0.2592 | 0.86 (0.67-1.12) |
| rs28795483  | 155331675 | T/C | 0.33 | 0.31 | 0.6373 | 1.06 (0.84-1.33) |
| rs4550900   | 155331774 | T/C | 0.33 | 0.32 | 0.6558 | 1.05 (0.83-1.33) |
| rs4615159   | 155332046 | T/C | 0.24 | 0.26 | 0.2833 | 0.87 (0.67-1.13) |
| rs7681004   | 155332330 | G/T | 0.09 | 0.05 | 0.0014 | 1.88 (1.27-2.79) |
| rs6851087   | 155333714 | T/C | 0.03 | 0.02 | 0.0498 | 1.95 (0.99-3.83) |
| rs7674936   | 155334762 | A/G | 0.03 | 0.01 | 0.0361 | 2.04 (1.04-4.02) |
| rs6536008   | 155338890 | G/A | 0.08 | 0.09 | 0.5997 | 0.90 (0.60-1.34) |

|            |           |     |      |      |        |                  |
|------------|-----------|-----|------|------|--------|------------------|
| rs902455   | 155339195 | G/A | 0.09 | 0.09 | 0.6639 | 0.92 (0.62-1.35) |
| rs7686357  | 155339902 | T/G | 0.08 | 0.09 | 0.5962 | 0.90 (0.60-1.34) |
| rs13123127 | 155340110 | C/T | 0.08 | 0.09 | 0.6248 | 0.91 (0.61-1.34) |
| rs2896868  | 155343176 | T/C | 0.08 | 0.09 | 0.5415 | 0.88 (0.59-1.32) |
| rs4235245  | 155343387 | C/T | 0.09 | 0.10 | 0.6093 | 0.90 (0.61-1.33) |
| rs10005270 | 155343913 | T/C | 0.08 | 0.09 | 0.5415 | 0.88 (0.59-1.32) |
| rs7659456  | 155344762 | C/T | 0.08 | 0.09 | 0.5689 | 0.89 (0.60-1.32) |
| rs4696564  | 155346362 | T/C | 0.08 | 0.09 | 0.6440 | 0.91 (0.61-1.36) |
| rs4696566  | 155347856 | A/C | 0.08 | 0.09 | 0.5613 | 0.89 (0.60-1.32) |
| rs4696569  | 155348012 | A/G | 0.08 | 0.09 | 0.5477 | 0.88 (0.59-1.32) |
| rs4696570  | 155348049 | A/G | 0.08 | 0.09 | 0.5596 | 0.89 (0.60-1.32) |
| rs7685089  | 155348490 | A/G | 0.08 | 0.09 | 0.5596 | 0.89 (0.60-1.32) |
| rs7685617  | 155348655 | C/T | 0.08 | 0.09 | 0.5596 | 0.89 (0.60-1.32) |
| rs6843389  | 155348683 | A/C | 0.08 | 0.09 | 0.5504 | 0.88 (0.59-1.32) |
| rs1907152  | 155349311 | T/C | 0.08 | 0.09 | 0.5596 | 0.89 (0.60-1.32) |
| rs1907151  | 155349445 | A/C | 0.08 | 0.09 | 0.5493 | 0.89 (0.60-1.31) |
| rs1907150  | 155349463 | G/A | 0.08 | 0.09 | 0.5596 | 0.89 (0.60-1.32) |
| rs6849849  | 155349560 | A/G | 0.08 | 0.09 | 0.5596 | 0.89 (0.60-1.32) |
| rs6828176  | 155350111 | T/C | 0.08 | 0.10 | 0.4911 | 0.87 (0.59-1.29) |
| rs9995943  | 155351598 | G/A | 0.20 | 0.19 | 0.5586 | 1.09 (0.82-1.43) |
| rs10030235 | 155351627 | C/T | 0.20 | 0.19 | 0.5942 | 1.08 (0.82-1.42) |
| rs35418965 | 155351937 | G/A | 0.20 | 0.19 | 0.5641 | 1.08 (0.82-1.43) |
| rs10000511 | 155351991 | C/T | 0.20 | 0.19 | 0.5641 | 1.08 (0.82-1.43) |
| rs7677032  | 155352444 | G/A | 0.08 | 0.09 | 0.5436 | 0.88 (0.59-1.32) |
| rs17031636 | 155353048 | C/A | 0.08 | 0.09 | 0.5429 | 0.88 (0.59-1.32) |
| rs1490656  | 155353882 | C/T | 0.20 | 0.19 | 0.5879 | 1.08 (0.82-1.42) |
| rs1388076  | 155354083 | A/C | 0.20 | 0.19 | 0.6214 | 1.07 (0.81-1.41) |
| rs4696572  | 155354916 | T/C | 0.28 | 0.28 | 0.9583 | 1.01 (0.79-1.28) |
| rs6833061  | 155356110 | T/C | 0.08 | 0.09 | 0.5173 | 0.88 (0.59-1.31) |
| rs6856249  | 155356127 | A/G | 0.20 | 0.19 | 0.5999 | 1.08 (0.82-1.42) |
| rs10013533 | 155356273 | C/T | 0.20 | 0.19 | 0.5999 | 1.08 (0.82-1.42) |
| rs12506034 | 155356610 | C/T | 0.20 | 0.19 | 0.5999 | 1.08 (0.82-1.42) |
| rs1388087  | 155357085 | T/G | 0.20 | 0.19 | 0.5988 | 1.08 (0.82-1.42) |
| rs1388088  | 155357218 | G/A | 0.20 | 0.19 | 0.6045 | 1.08 (0.82-1.41) |
| rs1388066  | 155357388 | T/G | 0.20 | 0.19 | 0.5892 | 1.08 (0.82-1.42) |
| rs1388067  | 155357475 | T/C | 0.20 | 0.19 | 0.5388 | 1.09 (0.83-1.44) |
| rs61283912 | 155359733 | A/G | 0.20 | 0.19 | 0.5696 | 1.08 (0.82-1.42) |
| rs9884952  | 155359761 | G/A | 0.20 | 0.19 | 0.5696 | 1.08 (0.82-1.42) |
| rs9884132  | 155359968 | G/A | 0.20 | 0.19 | 0.5696 | 1.08 (0.82-1.42) |
| rs9884570  | 155360001 | A/C | 0.20 | 0.19 | 0.5696 | 1.08 (0.82-1.42) |
| rs9884574  | 155360012 | T/G | 0.20 | 0.19 | 0.5696 | 1.08 (0.82-1.42) |
| rs11099954 | 155360144 | C/T | 0.20 | 0.19 | 0.5696 | 1.08 (0.82-1.42) |
| rs10014536 | 155360533 | T/C | 0.20 | 0.19 | 0.5696 | 1.08 (0.82-1.42) |
| rs10014635 | 155360593 | A/C | 0.20 | 0.19 | 0.5696 | 1.08 (0.82-1.42) |
| rs4399970  | 155360707 | C/T | 0.20 | 0.19 | 0.5696 | 1.08 (0.82-1.42) |
| rs1032336  | 155360919 | T/C | 0.20 | 0.19 | 0.5696 | 1.08 (0.82-1.42) |
| rs1032335  | 155361010 | G/A | 0.20 | 0.19 | 0.5696 | 1.08 (0.82-1.42) |
| rs1907155  | 155361244 | G/T | 0.21 | 0.19 | 0.5799 | 1.08 (0.82-1.42) |
| rs1907154  | 155361275 | A/G | 0.20 | 0.19 | 0.5696 | 1.08 (0.82-1.42) |
| rs1490684  | 155362154 | A/C | 0.20 | 0.19 | 0.5696 | 1.08 (0.82-1.42) |
| rs13146084 | 155364122 | T/C | 0.25 | 0.26 | 0.9754 | 1.00 (0.77-1.28) |
| rs4267717  | 155365967 | T/C | 0.24 | 0.24 | 0.9925 | 1.00 (0.77-1.29) |
| rs1490659  | 155366714 | T/G | 0.24 | 0.24 | 0.9837 | 1.00 (0.78-1.30) |
| rs35283999 | 155370024 | T/C | 0.24 | 0.24 | 0.9798 | 1.00 (0.77-1.29) |
| rs4696576  | 155371246 | G/A | 0.31 | 0.30 | 0.8203 | 1.03 (0.81-1.30) |

|            |           |     |      |      |        |                  |
|------------|-----------|-----|------|------|--------|------------------|
| rs62330369 | 155379708 | G/A | 0.17 | 0.17 | 0.9229 | 0.99 (0.74-1.32) |
| rs11731813 | 155379883 | A/G | 0.32 | 0.30 | 0.4392 | 1.10 (0.87-1.39) |
| rs1490677  | 155380037 | A/C | 0.15 | 0.12 | 0.1848 | 1.23 (0.90-1.68) |
| rs28429061 | 155380185 | C/T | 0.17 | 0.17 | 0.9229 | 0.99 (0.74-1.32) |
| rs12643014 | 155381726 | A/G | 0.15 | 0.12 | 0.1837 | 1.23 (0.90-1.68) |
| rs13124347 | 155382037 | T/C | 0.15 | 0.13 | 0.2103 | 1.22 (0.89-1.66) |
| rs13148992 | 155382108 | G/A | 0.32 | 0.30 | 0.4546 | 1.09 (0.86-1.39) |
| rs11725265 | 155382697 | T/C | 0.15 | 0.13 | 0.2103 | 1.22 (0.89-1.66) |
| rs1907156  | 155384995 | A/G | 0.15 | 0.12 | 0.1815 | 1.24 (0.91-1.69) |
| rs12649437 | 155387171 | G/A | 0.17 | 0.17 | 0.8545 | 0.97 (0.73-1.30) |
| rs72725345 | 155387524 | A/G | 0.15 | 0.12 | 0.1848 | 1.23 (0.90-1.68) |
| rs56137436 | 155389000 | C/A | 0.15 | 0.12 | 0.1837 | 1.23 (0.90-1.68) |
| rs10857276 | 155391441 | G/T | 0.15 | 0.13 | 0.2091 | 1.22 (0.89-1.66) |
| rs11935196 | 155392190 | G/A | 0.15 | 0.13 | 0.2067 | 1.22 (0.90-1.66) |
| rs4696582  | 155396138 | C/T | 0.15 | 0.12 | 0.1948 | 1.23 (0.90-1.67) |
| rs4696583  | 155396176 | T/C | 0.15 | 0.13 | 0.2160 | 1.21 (0.89-1.65) |
| rs72725351 | 155397357 | C/A | 0.15 | 0.12 | 0.1948 | 1.23 (0.90-1.67) |
| rs4696584  | 155397517 | A/G | 0.15 | 0.12 | 0.2111 | 1.22 (0.89-1.66) |
| rs6819298  | 155397921 | G/T | 0.15 | 0.12 | 0.1804 | 1.24 (0.91-1.69) |
| rs6844895  | 155397991 | T/C | 0.15 | 0.12 | 0.1804 | 1.24 (0.91-1.69) |
| rs72725354 | 155399841 | G/A | 0.15 | 0.12 | 0.1751 | 1.24 (0.91-1.69) |
| rs4696585  | 155400323 | A/G | 0.15 | 0.13 | 0.2232 | 1.21 (0.89-1.65) |
| rs59686383 | 155400718 | C/T | 0.16 | 0.13 | 0.1673 | 1.24 (0.91-1.67) |
| rs61270934 | 155400949 | C/T | 0.16 | 0.13 | 0.1666 | 1.24 (0.91-1.67) |
| rs10517593 | 155400984 | C/T | 0.16 | 0.14 | 0.1967 | 1.22 (0.90-1.64) |
| rs1552638  | 155402365 | A/G | 0.16 | 0.13 | 0.1638 | 1.24 (0.92-1.67) |
| rs1552639  | 155402499 | A/G | 0.16 | 0.13 | 0.1638 | 1.24 (0.92-1.67) |
| rs56223712 | 155403065 | A/G | 0.16 | 0.13 | 0.1638 | 1.24 (0.92-1.67) |
| rs6536014  | 155403068 | C/T | 0.16 | 0.13 | 0.1638 | 1.24 (0.92-1.67) |
| rs1490666  | 155403285 | G/T | 0.16 | 0.13 | 0.1638 | 1.24 (0.92-1.67) |
| rs72729002 | 155405405 | G/A | 0.16 | 0.13 | 0.1508 | 1.25 (0.92-1.68) |
| rs1388081  | 155405579 | G/A | 0.16 | 0.13 | 0.1508 | 1.25 (0.92-1.68) |
| rs4696587  | 155405655 | G/A | 0.16 | 0.13 | 0.1548 | 1.24 (0.92-1.68) |
| rs4696588  | 155405717 | C/T | 0.16 | 0.13 | 0.1548 | 1.24 (0.92-1.68) |
| rs4150     | 155405919 | C/T | 0.16 | 0.13 | 0.1548 | 1.24 (0.92-1.68) |
| rs1388075  | 155406720 | C/T | 0.16 | 0.13 | 0.1423 | 1.25 (0.93-1.69) |
| rs1490652  | 155407089 | A/G | 0.16 | 0.13 | 0.1276 | 1.26 (0.93-1.71) |
| rs4235246  | 155419003 | T/C | 0.18 | 0.14 | 0.0770 | 1.30 (0.97-1.73) |
| rs10014500 | 155420487 | A/G | 0.17 | 0.14 | 0.0495 | 1.33 (1.00-1.79) |
| rs6819398  | 155420809 | A/G | 0.24 | 0.21 | 0.3189 | 1.14 (0.88-1.48) |
| rs4533754  | 155421442 | C/A | 0.06 | 0.07 | 0.6327 | 0.89 (0.56-1.43) |
| rs4345160  | 155421710 | G/A | 0.18 | 0.15 | 0.1455 | 1.24 (0.93-1.65) |
| rs6832166  | 155422398 | A/G | 0.24 | 0.21 | 0.3359 | 1.14 (0.88-1.48) |
| rs7681708  | 155423520 | T/G | 0.18 | 0.15 | 0.1290 | 1.25 (0.94-1.67) |
| rs4323084  | 155424231 | C/T | 0.24 | 0.21 | 0.2558 | 1.16 (0.90-1.50) |
| rs6846825  | 155424832 | T/G | 0.18 | 0.14 | 0.0654 | 1.31 (0.98-1.75) |
| rs4132149  | 155425156 | T/G | 0.06 | 0.07 | 0.7055 | 0.92 (0.58-1.45) |
| rs4696595  | 155425967 | A/G | 0.18 | 0.14 | 0.1000 | 1.27 (0.95-1.70) |
| rs10019863 | 155427505 | T/G | 0.18 | 0.14 | 0.1046 | 1.27 (0.95-1.69) |
| rs6536017  | 155430666 | A/G | 0.06 | 0.07 | 0.7495 | 0.93 (0.59-1.46) |
| rs4482740  | 155446305 | A/G | 0.27 | 0.26 | 0.6589 | 1.06 (0.83-1.35) |

SNP, single nucleotide polymorphism; BP, base position; MAF, minor allele frequency; TPP, thyrotoxic hypokalemic periodic paralysis; OR, odds ratio; CI, confidence interval.

**eTable 6. TPP association results for the imputed and typed SNPs in the 11q14.1 region in the initial genome-wide scan**

| SNP        | BP       | Alleles | MAF_TPP | MAF_Controls | P      | OR (95%CI)       |
|------------|----------|---------|---------|--------------|--------|------------------|
| rs76259055 | 77155326 | C/A     | 0.06    | 0.06         | 0.7407 | 0.92 (0.58-1.48) |
| rs2852394  | 77155851 | A/C     | 0.19    | 0.19         | 0.7473 | 0.95 (0.72-1.27) |
| rs3015982  | 77157188 | G/T     | 0.06    | 0.06         | 0.7407 | 0.92 (0.58-1.48) |
| rs7119033  | 77158800 | C/A     | 0.41    | 0.44         | 0.2300 | 0.87 (0.70-1.09) |
| rs3019258  | 77159119 | C/T     | 0.54    | 0.50         | 0.1782 | 1.17 (0.93-1.45) |
| rs3019236  | 77161420 | T/C     | 0.06    | 0.06         | 0.7407 | 0.92 (0.58-1.48) |
| rs11237189 | 77161696 | G/A     | 0.18    | 0.19         | 0.7503 | 0.95 (0.72-1.27) |
| rs7112264  | 77161741 | G/T     | 0.22    | 0.25         | 0.2253 | 0.84 (0.65-1.10) |
| rs3019234  | 77162790 | A/G     | 0.06    | 0.06         | 0.7188 | 0.92 (0.57-1.47) |
| rs11237190 | 77163263 | C/T     | 0.21    | 0.24         | 0.2400 | 0.85 (0.65-1.11) |
| rs3019233  | 77163500 | G/A     | 0.06    | 0.06         | 0.7407 | 0.92 (0.58-1.48) |
| rs57305199 | 77164354 | A/G     | 0.21    | 0.24         | 0.2473 | 0.85 (0.65-1.11) |
| rs3015983  | 77164904 | C/T     | 0.06    | 0.06         | 0.7582 | 0.93 (0.58-1.48) |
| rs10899378 | 77166652 | G/A     | 0.19    | 0.19         | 0.7696 | 0.96 (0.72-1.27) |
| rs79930550 | 77166936 | G/A     | 0.22    | 0.25         | 0.2606 | 0.86 (0.66-1.11) |
| rs17135670 | 77166977 | C/T     | 0.22    | 0.25         | 0.2552 | 0.85 (0.66-1.11) |
| rs11237193 | 77167670 | C/T     | 0.19    | 0.19         | 0.7696 | 0.96 (0.72-1.27) |
| rs3015985  | 77169102 | G/T     | 0.06    | 0.06         | 0.7815 | 0.94 (0.59-1.49) |
| rs10899379 | 77169671 | G/A     | 0.40    | 0.44         | 0.1826 | 0.86 (0.69-1.07) |
| rs11828786 | 77169828 | C/A     | 0.22    | 0.25         | 0.2235 | 0.84 (0.65-1.10) |
| rs7934230  | 77171171 | A/G     | 0.06    | 0.06         | 0.8038 | 0.94 (0.59-1.51) |
| rs3015988  | 77171649 | C/T     | 0.06    | 0.06         | 0.8038 | 0.94 (0.59-1.51) |
| rs3015990  | 77172200 | C/A     | 0.06    | 0.06         | 0.8038 | 0.94 (0.59-1.51) |
| rs947809   | 77172478 | T/C     | 0.21    | 0.24         | 0.2400 | 0.85 (0.65-1.11) |
| rs11237195 | 77172833 | C/T     | 0.18    | 0.19         | 0.8054 | 0.96 (0.73-1.28) |
| rs34025917 | 77173244 | T/C     | 0.06    | 0.06         | 0.8797 | 0.96 (0.60-1.54) |
| rs3019249  | 77175444 | C/T     | 0.27    | 0.31         | 0.1864 | 0.84 (0.66-1.08) |
| rs12271542 | 77175552 | G/T     | 0.19    | 0.19         | 0.8481 | 0.97 (0.73-1.29) |
| rs11237196 | 77176731 | A/G     | 0.19    | 0.19         | 0.8923 | 0.98 (0.74-1.30) |
| rs3019238  | 77204866 | G/A     | 0.27    | 0.26         | 0.5863 | 1.07 (0.84-1.37) |
| rs3018480  | 77208493 | T/C     | 0.27    | 0.26         | 0.5593 | 1.08 (0.84-1.38) |
| rs3019247  | 77214428 | T/C     | 0.06    | 0.06         | 0.7885 | 0.94 (0.59-1.49) |
| rs3018476  | 77215077 | T/C     | 0.06    | 0.06         | 0.7938 | 0.94 (0.60-1.49) |
| rs3019246  | 77215589 | C/T     | 0.06    | 0.07         | 0.7545 | 0.93 (0.59-1.47) |
| rs3019245  | 77215675 | A/G     | 0.06    | 0.07         | 0.8378 | 0.95 (0.61-1.49) |
| rs6592724  | 77224972 | A/G     | 0.42    | 0.36         | 0.0307 | 1.28 (1.02-1.59) |
| rs7109180  | 77226842 | G/A     | 0.34    | 0.39         | 0.0709 | 0.81 (0.64-1.02) |
| rs1945753  | 77235279 | A/G     | 0.33    | 0.37         | 0.0976 | 0.82 (0.65-1.04) |
| rs6592725  | 77240152 | T/C     | 0.44    | 0.48         | 0.1786 | 0.86 (0.69-1.07) |
| rs72943494 | 77253788 | A/G     | 0.25    | 0.17         | 0.0001 | 1.66 (1.28-2.14) |
| rs11823651 | 77253879 | A/G     | 0.07    | 0.10         | 0.1406 | 0.73 (0.48-1.10) |
| rs72943497 | 77254266 | T/C     | 0.25    | 0.17         | 0.0001 | 1.65 (1.28-2.14) |
| rs11602520 | 77254720 | C/T     | 0.07    | 0.10         | 0.1270 | 0.72 (0.47-1.09) |
| rs12797573 | 77255306 | C/T     | 0.39    | 0.43         | 0.1415 | 0.85 (0.68-1.06) |
| rs7927173  | 77255548 | G/A     | 0.07    | 0.10         | 0.1221 | 0.71 (0.47-1.09) |
| rs60842160 | 77257804 | T/C     | 0.25    | 0.17         | 0.0001 | 1.65 (1.28-2.13) |
| rs10160677 | 77257805 | A/G     | 0.07    | 0.10         | 0.1284 | 0.72 (0.47-1.09) |
| rs1540181  | 77259435 | T/C     | 0.21    | 0.23         | 0.4329 | 0.90 (0.69-1.18) |
| rs1540180  | 77259574 | C/T     | 0.21    | 0.23         | 0.4297 | 0.90 (0.69-1.18) |

|             |          |     |      |      |                       |                  |
|-------------|----------|-----|------|------|-----------------------|------------------|
| rs11237216  | 77260742 | A/G | 0.46 | 0.49 | 0.1900                | 0.86 (0.69-1.08) |
| rs7943055   | 77261051 | T/C | 0.33 | 0.27 | 0.0297                | 1.30 (1.03-1.65) |
| rs4509797   | 77263203 | G/A | 0.07 | 0.10 | 0.1109                | 0.71 (0.47-1.08) |
| rs12290511  | 77266663 | G/T | 0.33 | 0.27 | 0.0292                | 1.30 (1.03-1.65) |
| rs10793255  | 77267611 | G/A | 0.07 | 0.10 | 0.0980                | 0.70 (0.46-1.06) |
| rs11237220  | 77268460 | A/G | 0.08 | 0.10 | 0.1388                | 0.73 (0.48-1.10) |
| rs7943742   | 77268856 | T/C | 0.33 | 0.27 | 0.0281                | 1.30 (1.03-1.65) |
| rs28451110  | 77269048 | C/T | 0.33 | 0.27 | 0.0270                | 1.31 (1.03-1.65) |
| rs6592730   | 77274203 | C/T | 0.33 | 0.27 | 0.0242                | 1.31 (1.04-1.66) |
| rs4366508   | 77274999 | T/C | 0.33 | 0.27 | 0.0242                | 1.31 (1.04-1.66) |
| rs4572159   | 77275337 | C/T | 0.21 | 0.23 | 0.3840                | 0.89 (0.68-1.16) |
| rs11512896  | 77275718 | G/A | 0.07 | 0.09 | 0.2188                | 0.77 (0.50-1.17) |
| rs4944164   | 77275849 | A/G | 0.33 | 0.27 | 0.0152                | 1.34 (1.06-1.70) |
| rs10899387  | 77276188 | T/C | 0.08 | 0.10 | 0.1322                | 0.73 (0.48-1.10) |
| rs12418261  | 77276462 | A/G | 0.25 | 0.17 | 0.0001                | 1.65 (1.28-2.13) |
| rs4945179   | 77278624 | C/T | 0.21 | 0.23 | 0.3810                | 0.89 (0.68-1.16) |
| rs68052959  | 77281589 | G/T | 0.25 | 0.17 | 0.0001                | 1.65 (1.28-2.14) |
| rs4553396   | 77282025 | A/G | 0.25 | 0.17 | 0.0002                | 1.65 (1.27-2.13) |
| rs2187547   | 77282081 | A/G | 0.25 | 0.17 | 0.0002                | 1.65 (1.27-2.13) |
| rs2156842   | 77282510 | G/A | 0.25 | 0.17 | 0.0002                | 1.65 (1.27-2.13) |
| rs4399350   | 77283055 | T/C | 0.25 | 0.17 | 0.0002                | 1.65 (1.27-2.13) |
| rs10899390  | 77283455 | A/C | 0.07 | 0.06 | 0.6029                | 1.12 (0.72-1.75) |
| rs11237226  | 77283606 | G/A | 0.07 | 0.06 | 0.6060                | 1.12 (0.72-1.74) |
| rs7950612   | 77283672 | C/T | 0.25 | 0.17 | 0.0002                | 1.65 (1.27-2.13) |
| rs7932111   | 77283687 | A/G | 0.25 | 0.17 | 0.0002                | 1.65 (1.27-2.13) |
| rs7933197   | 77283882 | T/C | 0.25 | 0.17 | 0.0002                | 1.65 (1.27-2.13) |
| rs4945182   | 77284886 | A/G | 0.25 | 0.17 | 0.0002                | 1.65 (1.27-2.13) |
| rs4945183   | 77285411 | T/G | 0.25 | 0.17 | 0.0001                | 1.65 (1.28-2.13) |
| rs12575305  | 77289090 | T/C | 0.25 | 0.17 | 0.0002                | 1.65 (1.27-2.13) |
| rs1945751   | 77289678 | A/G | 0.25 | 0.17 | 0.0002                | 1.65 (1.27-2.13) |
| rs12421695  | 77290439 | A/G | 0.25 | 0.17 | 0.0002                | 1.64 (1.27-2.12) |
| rs7947430   | 77290835 | C/A | 0.25 | 0.17 | 0.0002                | 1.64 (1.27-2.12) |
| rs67062156  | 77291457 | C/T | 0.25 | 0.17 | 0.0002                | 1.64 (1.27-2.11) |
| rs12574660  | 77292650 | T/C | 0.25 | 0.17 | 0.0002                | 1.64 (1.27-2.12) |
| rs59983642  | 77296055 | T/C | 0.25 | 0.17 | 0.0003                | 1.61 (1.24-2.09) |
| rs60849458  | 77296096 | C/T | 0.25 | 0.17 | 0.0002                | 1.64 (1.27-2.12) |
| rs67843465  | 77296319 | T/C | 0.25 | 0.17 | 0.0002                | 1.64 (1.27-2.12) |
| rs146238615 | 77297562 | T/G | 0.07 | 0.06 | 0.4953                | 1.16 (0.75-1.79) |
| rs113377845 | 77298886 | G/A | 0.25 | 0.17 | 0.0002                | 1.64 (1.27-2.13) |
| rs57588070  | 77299451 | A/G | 0.25 | 0.17 | 0.0002                | 1.64 (1.27-2.12) |
| rs11237230  | 77299627 | T/C | 0.07 | 0.06 | 0.4953                | 1.16 (0.75-1.79) |
| rs7129556   | 77300048 | T/C | 0.07 | 0.10 | 0.1597                | 0.74 (0.48-1.12) |
| rs2276415   | 77301341 | A/G | 0.25 | 0.17 | 0.0001                | 1.66 (1.28-2.14) |
| rs2276416   | 77301689 | T/C | 0.25 | 0.17 | 0.0001                | 1.65 (1.28-2.13) |
| rs59581090  | 77304482 | C/T | 0.25 | 0.17 | 0.0001                | 1.65 (1.28-2.13) |
| rs12577552  | 77305955 | A/G | 0.25 | 0.17 | 0.0001                | 1.66 (1.28-2.14) |
| rs6592736   | 77306254 | T/C | 0.25 | 0.17 | 0.0001                | 1.65 (1.28-2.13) |
| rs11237234  | 77309242 | T/G | 0.25 | 0.17 | 0.0001                | 1.66 (1.29-2.14) |
| rs10793257  | 77309533 | C/T | 0.33 | 0.27 | 0.0221                | 1.32 (1.04-1.67) |
| rs59969402  | 77309795 | G/T | 0.25 | 0.17 | 0.0001                | 1.66 (1.29-2.14) |
| rs7109398   | 77311154 | A/G | 0.25 | 0.17 | $9.92 \times 10^{-5}$ | 1.67 (1.29-2.15) |
| rs72945566  | 77311259 | T/C | 0.25 | 0.17 | $9.29 \times 10^{-5}$ | 1.67 (1.29-2.15) |
| rs11237236  | 77312790 | A/G | 0.08 | 0.10 | 0.1776                | 0.75 (0.50-1.13) |
| rs60132034  | 77312872 | T/C | 0.25 | 0.17 | $9.01 \times 10^{-5}$ | 1.67 (1.29-2.16) |
| rs713083    | 77313583 | A/G | 0.25 | 0.17 | $9.75 \times 10^{-5}$ | 1.67 (1.29-2.15) |

|             |          |     |      |      |                       |                  |
|-------------|----------|-----|------|------|-----------------------|------------------|
| rs7930885   | 77314064 | G/A | 0.25 | 0.17 | $9.01 \times 10^{-5}$ | 1.67 (1.29-2.16) |
| rs7930988   | 77314133 | G/A | 0.25 | 0.17 | $9.75 \times 10^{-5}$ | 1.67 (1.29-2.15) |
| rs2032395   | 77314503 | G/A | 0.08 | 0.10 | 0.1549                | 0.74 (0.49-1.11) |
| rs9634032   | 77315214 | C/T | 0.22 | 0.23 | 0.4382                | 0.90 (0.69-1.18) |
| rs58608947  | 77316377 | G/A | 0.25 | 0.17 | $9.75 \times 10^{-5}$ | 1.67 (1.29-2.15) |
| rs66504136  | 77316721 | A/C | 0.25 | 0.17 | $9.29 \times 10^{-5}$ | 1.67 (1.29-2.15) |
| rs7106659   | 77317886 | T/C | 0.24 | 0.17 | 0.0004                | 1.61 (1.24-2.09) |
| rs4945185   | 77318142 | A/G | 0.33 | 0.27 | 0.0141                | 1.34 (1.06-1.70) |
| rs57805854  | 77320209 | C/T | 0.25 | 0.17 | $9.29 \times 10^{-5}$ | 1.67 (1.29-2.15) |
| rs4944171   | 77321312 | C/T | 0.25 | 0.17 | $9.01 \times 10^{-5}$ | 1.67 (1.29-2.16) |
| rs58720932  | 77322422 | A/G | 0.25 | 0.17 | $9.58 \times 10^{-5}$ | 1.67 (1.29-2.15) |
| rs11237240  | 77322805 | A/G | 0.07 | 0.06 | 0.3916                | 1.20 (0.78-1.84) |
| rs6592738   | 77323126 | A/G | 0.08 | 0.10 | 0.1829                | 0.75 (0.50-1.14) |
| rs3087668   | 77323370 | A/G | 0.46 | 0.50 | 0.1492                | 0.85 (0.68-1.06) |
| rs4945188   | 77323714 | A/G | 0.21 | 0.23 | 0.3726                | 0.89 (0.68-1.16) |
| rs10899394  | 77324261 | G/A | 0.08 | 0.10 | 0.2312                | 0.78 (0.52-1.17) |
| rs11822592  | 77325222 | G/A | 0.25 | 0.17 | 0.0001                | 1.67 (1.29-2.16) |
| rs61358482  | 77325584 | G/T | 0.25 | 0.17 | $9.89 \times 10^{-5}$ | 1.67 (1.29-2.15) |
| rs4945189   | 77331665 | G/A | 0.25 | 0.17 | 0.0001                | 1.66 (1.28-2.15) |
| rs4945190   | 77331688 | C/A | 0.25 | 0.17 | 0.0001                | 1.65 (1.28-2.14) |
| rs3781616   | 77333325 | C/A | 0.25 | 0.17 | 0.0001                | 1.65 (1.28-2.14) |
| rs66488360  | 77334083 | A/C | 0.25 | 0.17 | 0.0001                | 1.65 (1.28-2.14) |
| rs12225695  | 77334139 | A/G | 0.07 | 0.06 | 0.6342                | 1.11 (0.71-1.73) |
| rs11237243  | 77334532 | A/G | 0.07 | 0.06 | 0.6342                | 1.11 (0.71-1.73) |
| rs1540179   | 77334939 | A/G | 0.25 | 0.17 | 0.0001                | 1.65 (1.28-2.13) |
| rs11237244  | 77335336 | G/A | 0.08 | 0.10 | 0.2041                | 0.76 (0.50-1.15) |
| rs2013296   | 77335982 | C/A | 0.22 | 0.24 | 0.4278                | 0.90 (0.69-1.17) |
| rs7131169   | 77337009 | C/A | 0.25 | 0.17 | 0.0001                | 1.65 (1.28-2.13) |
| rs7131298   | 77337121 | G/A | 0.25 | 0.17 | 0.0001                | 1.65 (1.28-2.13) |
| rs60929773  | 77339667 | G/A | 0.25 | 0.17 | 0.0001                | 1.65 (1.28-2.13) |
| rs7946637   | 77339831 | C/T | 0.22 | 0.23 | 0.4576                | 0.91 (0.69-1.18) |
| rs67807487  | 77340123 | T/C | 0.25 | 0.17 | 0.0001                | 1.65 (1.28-2.13) |
| rs11237249  | 77341135 | A/G | 0.08 | 0.10 | 0.2174                | 0.77 (0.51-1.16) |
| rs7109527   | 77341306 | A/G | 0.25 | 0.17 | 0.0001                | 1.66 (1.29-2.15) |
| rs59459776  | 77341733 | C/T | 0.25 | 0.17 | 0.0001                | 1.66 (1.29-2.15) |
| rs61468764  | 77343507 | A/C | 0.25 | 0.17 | 0.0001                | 1.66 (1.29-2.15) |
| rs7925252   | 77346885 | T/C | 0.25 | 0.17 | 0.0001                | 1.65 (1.28-2.14) |
| rs7942838   | 77346961 | C/T | 0.25 | 0.17 | 0.0001                | 1.65 (1.28-2.14) |
| rs68013767  | 77349181 | C/T | 0.25 | 0.17 | 0.0001                | 1.66 (1.28-2.15) |
| rs59765258  | 77350211 | T/C | 0.25 | 0.17 | 0.0001                | 1.66 (1.29-2.15) |
| rs10466710  | 77350337 | G/A | 0.32 | 0.27 | 0.0195                | 1.33 (1.05-1.68) |
| rs113158303 | 77350759 | T/C | 0.25 | 0.17 | 0.0001                | 1.66 (1.29-2.15) |
| rs4945192   | 77350959 | A/G | 0.25 | 0.17 | 0.0001                | 1.66 (1.29-2.15) |
| rs12574999  | 77354007 | C/T | 0.25 | 0.16 | $8.43 \times 10^{-5}$ | 1.68 (1.30-2.18) |
| rs67881763  | 77355099 | C/T | 0.24 | 0.16 | $2.97 \times 10^{-5}$ | 1.75 (1.35-2.27) |
| rs57687790  | 77362010 | T/C | 0.24 | 0.16 | $4.57 \times 10^{-5}$ | 1.72 (1.33-2.24) |
| rs56097222  | 77362181 | A/G | 0.24 | 0.15 | $3.22 \times 10^{-5}$ | 1.74 (1.34-2.26) |
| rs7482006   | 77364942 | G/A | 0.24 | 0.16 | $4.57 \times 10^{-5}$ | 1.72 (1.33-2.24) |
| rs11604207  | 77367542 | T/C | 0.07 | 0.08 | 0.4504                | 0.85 (0.56-1.29) |
| rs72945598  | 77367738 | T/C | 0.07 | 0.08 | 0.4380                | 0.84 (0.55-1.28) |
| rs7939623   | 77370758 | C/T | 0.25 | 0.16 | $1.75 \times 10^{-5}$ | 1.77 (1.36-2.29) |
| rs7950631   | 77370897 | T/C | 0.25 | 0.16 | $1.75 \times 10^{-5}$ | 1.77 (1.36-2.29) |
| rs11237260  | 77372165 | C/A | 0.07 | 0.06 | 0.4374                | 1.18 (0.77-1.81) |
| rs2298820   | 77373414 | G/T | 0.25 | 0.16 | $1.81 \times 10^{-5}$ | 1.76 (1.36-2.28) |
| rs6592742   | 77376247 | T/C | 0.25 | 0.16 | $1.62 \times 10^{-5}$ | 1.77 (1.37-2.29) |



|            |          |     |      |      |                       |                  |
|------------|----------|-----|------|------|-----------------------|------------------|
| rs4945197  | 77378388 | C/T | 0.25 | 0.16 | $1.72 \times 10^{-5}$ | 1.77 (1.37-2.29) |
| rs28930682 | 77378505 | G/A | 0.25 | 0.16 | $1.72 \times 10^{-5}$ | 1.77 (1.37-2.29) |
| rs11237263 | 77378805 | G/A | 0.07 | 0.09 | 0.3782                | 0.82 (0.54-1.25) |
| rs11603438 | 77378894 | A/G | 0.07 | 0.08 | 0.4380                | 0.84 (0.55-1.28) |
| rs12575150 | 77379588 | G/T | 0.25 | 0.16 | $1.72 \times 10^{-5}$ | 1.77 (1.37-2.29) |
| rs7118516  | 77380234 | T/C | 0.25 | 0.16 | $1.72 \times 10^{-5}$ | 1.77 (1.37-2.29) |
| rs12418734 | 77380493 | C/T | 0.25 | 0.16 | $1.72 \times 10^{-5}$ | 1.77 (1.37-2.29) |
| rs59520338 | 77380865 | G/A | 0.25 | 0.16 | $1.72 \times 10^{-5}$ | 1.77 (1.37-2.29) |
| rs67035387 | 77381472 | A/G | 0.25 | 0.16 | $1.72 \times 10^{-5}$ | 1.77 (1.37-2.29) |
| rs11237264 | 77381751 | C/T | 0.32 | 0.24 | 0.0021                | 1.46 (1.15-1.85) |
| rs3781617  | 77385968 | T/C | 0.25 | 0.16 | $1.75 \times 10^{-5}$ | 1.77 (1.36-2.29) |
| rs12286317 | 77389020 | C/T | 0.07 | 0.09 | 0.3661                | 0.82 (0.54-1.25) |
| rs66681087 | 77390658 | C/A | 0.25 | 0.16 | $1.84 \times 10^{-5}$ | 1.76 (1.36-2.28) |
| rs17135800 | 77391684 | A/C | 0.24 | 0.16 | $2.65 \times 10^{-5}$ | 1.75 (1.35-2.27) |
| rs17135809 | 77395697 | A/G | 0.25 | 0.16 | $1.81 \times 10^{-5}$ | 1.76 (1.36-2.28) |
| rs17135811 | 77397059 | G/A | 0.25 | 0.16 | $1.75 \times 10^{-5}$ | 1.77 (1.36-2.29) |
| rs34446294 | 77398568 | C/T | 0.25 | 0.16 | $1.71 \times 10^{-5}$ | 1.77 (1.37-2.29) |
| rs12421699 | 77398676 | C/T | 0.25 | 0.16 | $1.71 \times 10^{-5}$ | 1.77 (1.37-2.29) |
| rs11237271 | 77399474 | C/T | 0.25 | 0.16 | $1.71 \times 10^{-5}$ | 1.77 (1.37-2.29) |
| rs72947625 | 77399602 | T/G | 0.07 | 0.08 | 0.4462                | 0.85 (0.55-1.29) |
| rs1544274  | 77402419 | C/T | 0.25 | 0.16 | $1.71 \times 10^{-5}$ | 1.77 (1.37-2.29) |
| rs1544272  | 77402734 | A/C | 0.25 | 0.16 | $1.71 \times 10^{-5}$ | 1.77 (1.37-2.29) |
| rs66991096 | 77405192 | T/G | 0.25 | 0.16 | $1.71 \times 10^{-5}$ | 1.77 (1.37-2.29) |
| rs66738005 | 77405567 | C/T | 0.25 | 0.16 | $1.71 \times 10^{-5}$ | 1.77 (1.37-2.29) |
| rs2186573  | 77405814 | C/A | 0.25 | 0.16 | $1.93 \times 10^{-5}$ | 1.76 (1.36-2.28) |
| rs67313689 | 77408279 | A/G | 0.25 | 0.16 | $1.91 \times 10^{-5}$ | 1.76 (1.36-2.28) |
| rs66472445 | 77408426 | C/T | 0.25 | 0.16 | $1.91 \times 10^{-5}$ | 1.76 (1.36-2.28) |
| rs67291795 | 77408877 | T/C | 0.25 | 0.16 | $1.91 \times 10^{-5}$ | 1.76 (1.36-2.28) |
| rs4945201  | 77409246 | G/A | 0.23 | 0.25 | 0.3638                | 0.89 (0.69-1.15) |
| rs4945202  | 77409407 | T/C | 0.25 | 0.16 | $1.91 \times 10^{-5}$ | 1.76 (1.36-2.28) |
| rs4945203  | 77409568 | C/T | 0.25 | 0.16 | $1.91 \times 10^{-5}$ | 1.76 (1.36-2.28) |
| rs10899399 | 77409832 | T/C | 0.07 | 0.08 | 0.4312                | 0.84 (0.55-1.28) |
| rs2212317  | 77410678 | C/T | 0.23 | 0.25 | 0.3664                | 0.89 (0.69-1.15) |
| rs7124753  | 77411181 | G/A | 0.25 | 0.16 | $1.91 \times 10^{-5}$ | 1.76 (1.36-2.28) |
| rs7950873  | 77412851 | G/A | 0.07 | 0.08 | 0.4421                | 0.84 (0.55-1.29) |
| rs67680371 | 77414382 | C/T | 0.25 | 0.16 | $1.99 \times 10^{-5}$ | 1.76 (1.36-2.28) |
| rs67555375 | 77415232 | A/G | 0.25 | 0.16 | $1.99 \times 10^{-5}$ | 1.76 (1.36-2.28) |
| rs67775318 | 77415542 | A/G | 0.25 | 0.16 | $1.99 \times 10^{-5}$ | 1.76 (1.36-2.28) |
| rs4145700  | 77415565 | G/A | 0.55 | 0.49 | 0.0503                | 1.25 (1.00-1.55) |
| rs72947653 | 77415574 | C/T | 0.25 | 0.16 | $1.99 \times 10^{-5}$ | 1.76 (1.36-2.28) |
| rs7940734  | 77416091 | T/C | 0.23 | 0.25 | 0.3721                | 0.89 (0.69-1.15) |
| rs66675536 | 77418702 | T/C | 0.25 | 0.16 | $2.02 \times 10^{-5}$ | 1.76 (1.36-2.28) |
| rs66924979 | 77418880 | T/C | 0.25 | 0.16 | $2.02 \times 10^{-5}$ | 1.76 (1.36-2.28) |
| rs496786   | 77420314 | C/T | 0.23 | 0.25 | 0.3777                | 0.89 (0.69-1.16) |
| rs11827357 | 77422635 | T/C | 0.25 | 0.16 | $1.81 \times 10^{-5}$ | 1.76 (1.36-2.28) |
| rs72947668 | 77428933 | T/C | 0.07 | 0.08 | 0.4490                | 0.85 (0.56-1.29) |
| rs7119471  | 77429953 | G/A | 0.25 | 0.16 | $2.02 \times 10^{-5}$ | 1.76 (1.36-2.28) |
| rs4531493  | 77430652 | T/C | 0.25 | 0.16 | $2.02 \times 10^{-5}$ | 1.76 (1.36-2.28) |
| rs10899401 | 77431334 | A/G | 0.32 | 0.24 | 0.0019                | 1.46 (1.15-1.85) |
| rs12418844 | 77431867 | C/T | 0.25 | 0.16 | $2.17 \times 10^{-5}$ | 1.75 (1.36-2.27) |
| rs7116671  | 77433527 | C/T | 0.25 | 0.16 | $2.17 \times 10^{-5}$ | 1.75 (1.36-2.27) |
| rs12575014 | 77434125 | T/C | 0.25 | 0.16 | $2.43 \times 10^{-5}$ | 1.75 (1.35-2.26) |
| rs66664368 | 77434261 | C/T | 0.25 | 0.16 | $2.36 \times 10^{-5}$ | 1.75 (1.35-2.27) |
| rs59404463 | 77434465 | C/A | 0.25 | 0.16 | $2.17 \times 10^{-5}$ | 1.75 (1.36-2.27) |
| rs4344516  | 77438059 | G/A | 0.07 | 0.08 | 0.4394                | 0.84 (0.55-1.28) |

|             |          |     |      |      |                       |                  |
|-------------|----------|-----|------|------|-----------------------|------------------|
| rs56817084  | 77439495 | G/A | 0.25 | 0.16 | $2.17 \times 10^{-5}$ | 1.75 (1.36-2.27) |
| rs720383    | 77440106 | G/A | 0.25 | 0.16 | $2.17 \times 10^{-5}$ | 1.75 (1.36-2.27) |
| rs7109199   | 77441382 | T/C | 0.25 | 0.16 | $2.17 \times 10^{-5}$ | 1.75 (1.36-2.27) |
| rs2154988   | 77441591 | T/C | 0.25 | 0.16 | $2.17 \times 10^{-5}$ | 1.75 (1.36-2.27) |
| rs3949117   | 77441721 | A/G | 0.25 | 0.16 | $2.17 \times 10^{-5}$ | 1.75 (1.36-2.27) |
| rs75264226  | 77441973 | G/A | 0.25 | 0.16 | $2.17 \times 10^{-5}$ | 1.75 (1.36-2.27) |
| rs4945204   | 77443904 | C/T | 0.25 | 0.16 | $2.21 \times 10^{-5}$ | 1.75 (1.35-2.27) |
| rs4945205   | 77444469 | T/C | 0.25 | 0.16 | $2.17 \times 10^{-5}$ | 1.75 (1.36-2.27) |
| rs73491984  | 77446051 | C/T | 0.25 | 0.16 | $2.25 \times 10^{-5}$ | 1.75 (1.35-2.27) |
| rs77942147  | 77446117 | T/C | 0.25 | 0.16 | $2.25 \times 10^{-5}$ | 1.75 (1.35-2.27) |
| rs67769372  | 77446360 | T/C | 0.25 | 0.16 | $2.25 \times 10^{-5}$ | 1.75 (1.35-2.27) |
| rs7122968   | 77447054 | G/T | 0.06 | 0.08 | 0.1800                | 0.72 (0.45-1.16) |
| rs67724005  | 77447068 | T/C | 0.25 | 0.16 | $2.25 \times 10^{-5}$ | 1.75 (1.35-2.27) |
| rs28416524  | 77448616 | C/T | 0.23 | 0.25 | 0.4340                | 0.90 (0.70-1.17) |
| rs4945206   | 77452368 | A/G | 0.23 | 0.25 | 0.3848                | 0.89 (0.69-1.16) |
| rs11600998  | 77452790 | C/T | 0.06 | 0.08 | 0.3815                | 0.82 (0.52-1.27) |
| rs113465386 | 77453367 | T/C | 0.25 | 0.16 | $2.34 \times 10^{-5}$ | 1.75 (1.35-2.27) |
| rs12575416  | 77453386 | A/G | 0.07 | 0.06 | 0.5856                | 1.12 (0.74-1.72) |
| rs12294668  | 77454076 | T/C | 0.32 | 0.24 | 0.0018                | 1.47 (1.16-1.86) |
| rs60948958  | 77454257 | G/A | 0.25 | 0.16 | $2.34 \times 10^{-5}$ | 1.75 (1.35-2.27) |
| rs57362996  | 77454282 | C/T | 0.25 | 0.16 | $2.34 \times 10^{-5}$ | 1.75 (1.35-2.27) |
| rs10899402  | 77455166 | T/C | 0.23 | 0.25 | 0.4174                | 0.90 (0.69-1.17) |
| rs7924567   | 77455542 | G/A | 0.55 | 0.49 | 0.0443                | 1.25 (1.01-1.56) |
| rs11237279  | 77455583 | G/A | 0.32 | 0.24 | 0.0018                | 1.47 (1.16-1.86) |
| rs7927913   | 77455738 | C/T | 0.23 | 0.25 | 0.4174                | 0.90 (0.69-1.17) |
| rs10899403  | 77456343 | C/T | 0.23 | 0.25 | 0.4174                | 0.90 (0.69-1.17) |
| rs7120465   | 77456373 | T/C | 0.25 | 0.16 | $2.34 \times 10^{-5}$ | 1.75 (1.35-2.27) |
| rs17825097  | 77456786 | C/T | 0.07 | 0.06 | 0.5872                | 1.12 (0.73-1.72) |
| rs11237280  | 77456906 | G/A | 0.07 | 0.08 | 0.4744                | 0.85 (0.56-1.30) |
| rs7358471   | 77457616 | T/C | 0.23 | 0.25 | 0.5071                | 0.92 (0.71-1.19) |
| rs3819211   | 77457757 | G/A | 0.25 | 0.16 | $2.25 \times 10^{-5}$ | 1.75 (1.35-2.27) |
| rs58393579  | 77458907 | T/G | 0.25 | 0.16 | $2.25 \times 10^{-5}$ | 1.75 (1.35-2.27) |
| rs4322421   | 77459394 | T/C | 0.07 | 0.08 | 0.4504                | 0.85 (0.56-1.29) |
| rs7123204   | 77460614 | G/A | 0.25 | 0.16 | $2.25 \times 10^{-5}$ | 1.75 (1.35-2.27) |
| rs7118800   | 77461052 | C/A | 0.38 | 0.44 | 0.0260                | 0.78 (0.62-0.97) |
| rs10899404  | 77462792 | T/C | 0.07 | 0.08 | 0.4504                | 0.85 (0.56-1.29) |
| rs72949614  | 77463724 | T/C | 0.25 | 0.16 | $1.95 \times 10^{-5}$ | 1.76 (1.36-2.28) |
| rs4945209   | 77463991 | C/T | 0.25 | 0.16 | $2.25 \times 10^{-5}$ | 1.75 (1.35-2.27) |
| rs72949616  | 77464370 | T/C | 0.07 | 0.08 | 0.4744                | 0.85 (0.56-1.30) |
| rs72949618  | 77464530 | A/G | 0.07 | 0.08 | 0.4744                | 0.85 (0.56-1.30) |
| rs56218634  | 77464834 | G/A | 0.07 | 0.08 | 0.4744                | 0.85 (0.56-1.30) |
| rs7925343   | 77464936 | T/C | 0.23 | 0.25 | 0.4118                | 0.90 (0.69-1.16) |
| rs1986474   | 77466334 | A/G | 0.25 | 0.16 | $2.25 \times 10^{-5}$ | 1.75 (1.35-2.27) |
| rs537811    | 77468088 | A/C | 0.07 | 0.08 | 0.4339                | 0.84 (0.55-1.28) |
| rs11237284  | 77470067 | C/A | 0.23 | 0.25 | 0.3961                | 0.90 (0.69-1.16) |
| rs643388    | 77471042 | T/C | 0.07 | 0.08 | 0.4744                | 0.85 (0.56-1.30) |
| rs12420401  | 77471901 | G/A | 0.24 | 0.16 | $3.34 \times 10^{-5}$ | 1.74 (1.34-2.25) |
| rs10793262  | 77472138 | T/C | 0.23 | 0.25 | 0.4146                | 0.90 (0.69-1.17) |
| rs79574497  | 77473062 | A/C | 0.07 | 0.06 | 0.7028                | 1.09 (0.71-1.67) |
| rs12421391  | 77473209 | C/T | 0.25 | 0.16 | $2.34 \times 10^{-5}$ | 1.75 (1.35-2.27) |
| rs12419685  | 77473383 | T/C | 0.25 | 0.16 | $2.25 \times 10^{-5}$ | 1.75 (1.35-2.27) |
| rs1892869   | 77475506 | T/C | 0.25 | 0.16 | $2.34 \times 10^{-5}$ | 1.75 (1.35-2.27) |
| rs7951172   | 77476073 | T/C | 0.25 | 0.16 | $2.34 \times 10^{-5}$ | 1.75 (1.35-2.27) |
| rs1893901   | 77477828 | C/T | 0.25 | 0.16 | $2.82 \times 10^{-5}$ | 1.74 (1.34-2.25) |
| rs569072    | 77477956 | A/G | 0.34 | 0.40 | 0.0391                | 0.79 (0.63-0.99) |

|             |          |     |      |      |                       |                  |
|-------------|----------|-----|------|------|-----------------------|------------------|
| rs7930066   | 77478108 | A/G | 0.25 | 0.16 | $2.87 \times 10^{-5}$ | 1.74 (1.34-2.25) |
| rs55881536  | 77478779 | T/C | 0.25 | 0.16 | $2.87 \times 10^{-5}$ | 1.74 (1.34-2.25) |
| rs72949656  | 77479090 | T/C | 0.24 | 0.16 | $7.40 \times 10^{-5}$ | 1.70 (1.31-2.21) |
| rs4269952   | 77479264 | A/G | 0.24 | 0.16 | $5.79 \times 10^{-5}$ | 1.71 (1.32-2.22) |
| rs4578411   | 77479293 | C/T | 0.24 | 0.16 | $4.34 \times 10^{-5}$ | 1.73 (1.33-2.25) |
| rs67230007  | 77480543 | G/T | 0.25 | 0.16 | $2.87 \times 10^{-5}$ | 1.74 (1.34-2.25) |
| rs10899406  | 77482773 | G/A | 0.23 | 0.25 | 0.3925                | 0.89 (0.69-1.16) |
| rs516529    | 77484735 | T/C | 0.38 | 0.44 | 0.0228                | 0.77 (0.62-0.97) |
| rs10899407  | 77487163 | G/A | 0.23 | 0.25 | 0.3979                | 0.90 (0.69-1.16) |
| rs2154973   | 77488809 | T/C | 0.25 | 0.16 | $2.98 \times 10^{-5}$ | 1.74 (1.34-2.25) |
| rs2154972   | 77488825 | A/G | 0.07 | 0.08 | 0.4504                | 0.85 (0.56-1.29) |
| rs12364072  | 77489608 | G/T | 0.23 | 0.25 | 0.3979                | 0.90 (0.69-1.16) |
| rs4945210   | 77489725 | T/C | 0.25 | 0.16 | $2.87 \times 10^{-5}$ | 1.74 (1.34-2.25) |
| rs11237289  | 77489750 | G/T | 0.23 | 0.25 | 0.3979                | 0.90 (0.69-1.16) |
| rs4945211   | 77489851 | A/C | 0.25 | 0.16 | $2.98 \times 10^{-5}$ | 1.74 (1.34-2.25) |
| rs585513    | 77490850 | T/C | 0.38 | 0.44 | 0.0234                | 0.77 (0.62-0.97) |
| rs10899409  | 77490958 | A/G | 0.23 | 0.25 | 0.3353                | 0.88 (0.68-1.14) |
| rs7119665   | 77491864 | A/C | 0.25 | 0.16 | $1.52 \times 10^{-5}$ | 1.77 (1.37-2.30) |
| rs484363    | 77492594 | G/A | 0.07 | 0.08 | 0.4964                | 0.86 (0.56-1.31) |
| rs74480381  | 77494004 | C/T | 0.07 | 0.06 | 0.5877                | 1.12 (0.73-1.72) |
| rs684813    | 77494754 | A/G | 0.07 | 0.08 | 0.5129                | 0.87 (0.57-1.32) |
| rs7105526   | 77495156 | A/C | 0.25 | 0.16 | $2.98 \times 10^{-5}$ | 1.74 (1.34-2.25) |
| rs7106113   | 77495645 | T/C | 0.25 | 0.16 | $2.98 \times 10^{-5}$ | 1.74 (1.34-2.25) |
| rs11825573  | 77495896 | G/A | 0.25 | 0.16 | $2.98 \times 10^{-5}$ | 1.74 (1.34-2.25) |
| rs72931818  | 77496172 | T/C | 0.24 | 0.16 | $7.90 \times 10^{-5}$ | 1.70 (1.31-2.21) |
| rs2508189   | 77496567 | T/C | 0.07 | 0.09 | 0.4229                | 0.84 (0.55-1.28) |
| rs7936904   | 77497747 | T/C | 0.25 | 0.16 | $2.98 \times 10^{-5}$ | 1.74 (1.34-2.25) |
| rs11237295  | 77498274 | T/C | 0.23 | 0.25 | 0.4055                | 0.90 (0.69-1.16) |
| rs650171    | 77498486 | C/T | 0.07 | 0.08 | 0.4504                | 0.85 (0.56-1.29) |
| rs67200285  | 77498608 | T/C | 0.25 | 0.16 | $2.98 \times 10^{-5}$ | 1.74 (1.34-2.25) |
| rs72931829  | 77498615 | C/T | 0.25 | 0.16 | $2.98 \times 10^{-5}$ | 1.74 (1.34-2.25) |
| rs648842    | 77498768 | C/T | 0.55 | 0.49 | 0.0467                | 1.25 (1.00-1.56) |
| rs7123080   | 77499387 | T/C | 0.07 | 0.08 | 0.4504                | 0.85 (0.56-1.29) |
| rs60186049  | 77499534 | C/A | 0.25 | 0.16 | $2.98 \times 10^{-5}$ | 1.74 (1.34-2.25) |
| rs7127803   | 77500736 | T/C | 0.25 | 0.16 | $2.98 \times 10^{-5}$ | 1.74 (1.34-2.25) |
| rs4944175   | 77501103 | G/A | 0.25 | 0.16 | $2.98 \times 10^{-5}$ | 1.74 (1.34-2.25) |
| rs4945212   | 77501983 | G/A | 0.25 | 0.16 | $2.98 \times 10^{-5}$ | 1.74 (1.34-2.25) |
| rs4945213   | 77502132 | T/C | 0.25 | 0.16 | $2.98 \times 10^{-5}$ | 1.74 (1.34-2.25) |
| rs4945215   | 77502519 | C/A | 0.25 | 0.16 | $2.98 \times 10^{-5}$ | 1.74 (1.34-2.25) |
| rs67241586  | 77502632 | C/T | 0.25 | 0.16 | $2.98 \times 10^{-5}$ | 1.74 (1.34-2.25) |
| rs12418152  | 77504709 | T/C | 0.25 | 0.16 | $2.98 \times 10^{-5}$ | 1.74 (1.34-2.25) |
| rs61201484  | 77505479 | T/C | 0.25 | 0.16 | $2.98 \times 10^{-5}$ | 1.74 (1.34-2.25) |
| rs7931215   | 77506044 | T/C | 0.25 | 0.16 | $2.98 \times 10^{-5}$ | 1.74 (1.34-2.25) |
| rs11828664  | 77507198 | A/G | 0.25 | 0.16 | $2.87 \times 10^{-5}$ | 1.74 (1.34-2.25) |
| rs11824150  | 77507211 | T/C | 0.25 | 0.16 | $2.98 \times 10^{-5}$ | 1.74 (1.34-2.25) |
| rs144539886 | 77507420 | T/G | 0.25 | 0.16 | $2.98 \times 10^{-5}$ | 1.74 (1.34-2.25) |
| rs151245276 | 77508213 | T/C | 0.25 | 0.16 | $2.98 \times 10^{-5}$ | 1.74 (1.34-2.25) |
| rs11518811  | 77508592 | A/G | 0.23 | 0.25 | 0.4007                | 0.90 (0.69-1.16) |
| rs12420092  | 77509417 | T/C | 0.25 | 0.16 | $1.85 \times 10^{-5}$ | 1.76 (1.36-2.28) |
| rs7947859   | 77510547 | T/C | 0.25 | 0.16 | $2.74 \times 10^{-5}$ | 1.74 (1.35-2.26) |
| rs68146267  | 77513388 | C/T | 0.25 | 0.16 | $2.98 \times 10^{-5}$ | 1.74 (1.34-2.25) |
| rs7941418   | 77514216 | T/G | 0.25 | 0.16 | $2.98 \times 10^{-5}$ | 1.74 (1.34-2.25) |
| rs11237299  | 77514431 | A/G | 0.23 | 0.25 | 0.3684                | 0.89 (0.69-1.15) |
| rs113217620 | 77514434 | G/T | 0.25 | 0.16 | $2.98 \times 10^{-5}$ | 1.74 (1.34-2.25) |
| rs681411    | 77515230 | T/C | 0.55 | 0.49 | 0.0477                | 1.25 (1.00-1.56) |

|             |          |     |      |      |                       |                  |
|-------------|----------|-----|------|------|-----------------------|------------------|
| rs4469913   | 77517812 | A/C | 0.25 | 0.16 | $1.75 \times 10^{-5}$ | 1.77 (1.37-2.29) |
| rs12417488  | 77518680 | G/A | 0.25 | 0.16 | $2.98 \times 10^{-5}$ | 1.74 (1.34-2.25) |
| rs12418476  | 77520211 | C/T | 0.25 | 0.16 | $2.98 \times 10^{-5}$ | 1.74 (1.34-2.25) |
| rs7113415   | 77521390 | G/A | 0.25 | 0.16 | $2.59 \times 10^{-5}$ | 1.75 (1.35-2.26) |
| rs9988883   | 77522234 | T/C | 0.23 | 0.25 | 0.4029                | 0.90 (0.69-1.16) |
| rs650636    | 77522633 | G/A | 0.55 | 0.49 | 0.0467                | 1.25 (1.00-1.56) |
| rs59191974  | 77522677 | T/C | 0.25 | 0.16 | $2.98 \times 10^{-5}$ | 1.74 (1.34-2.25) |
| rs111692767 | 77522977 | T/G | 0.25 | 0.16 | $2.98 \times 10^{-5}$ | 1.74 (1.34-2.25) |
| rs4945217   | 77523084 | C/T | 0.25 | 0.16 | $1.85 \times 10^{-5}$ | 1.76 (1.36-2.28) |
| rs4945219   | 77523484 | T/C | 0.25 | 0.16 | $2.98 \times 10^{-5}$ | 1.74 (1.34-2.25) |
| rs58914857  | 77524722 | G/T | 0.25 | 0.16 | $2.98 \times 10^{-5}$ | 1.74 (1.34-2.25) |
| rs618535    | 77525203 | G/A | 0.55 | 0.49 | 0.0467                | 1.25 (1.00-1.56) |
| rs112873821 | 77525310 | A/G | 0.25 | 0.16 | $3.03 \times 10^{-5}$ | 1.74 (1.34-2.25) |
| rs28610388  | 77525654 | G/A | 0.25 | 0.16 | $2.98 \times 10^{-5}$ | 1.74 (1.34-2.25) |
| rs113740785 | 77525738 | A/G | 0.25 | 0.16 | $2.98 \times 10^{-5}$ | 1.74 (1.34-2.25) |
| rs637605    | 77525936 | T/G | 0.07 | 0.06 | 0.5472                | 1.14 (0.74-1.74) |
| rs12417115  | 77526474 | A/C | 0.38 | 0.44 | 0.0169                | 0.76 (0.61-0.95) |
| rs10793264  | 77528339 | C/T | 0.23 | 0.25 | 0.4029                | 0.90 (0.69-1.16) |
| rs623173    | 77529528 | C/T | 0.07 | 0.08 | 0.5038                | 0.86 (0.57-1.31) |
| rs67875187  | 77530953 | C/T | 0.25 | 0.16 | $2.98 \times 10^{-5}$ | 1.74 (1.34-2.25) |
| rs11820337  | 77531890 | C/T | 0.55 | 0.49 | 0.0467                | 1.25 (1.00-1.56) |
| rs78196556  | 77532306 | T/C | 0.03 | 0.04 | 0.5168                | 0.82 (0.45-1.49) |
| rs67606281  | 77532463 | C/T | 0.25 | 0.16 | $2.98 \times 10^{-5}$ | 1.74 (1.34-2.25) |
| rs4245453   | 77533652 | T/G | 0.23 | 0.25 | 0.3877                | 0.89 (0.69-1.16) |
| rs7937983   | 77534355 | G/A | 0.25 | 0.16 | $2.98 \times 10^{-5}$ | 1.74 (1.34-2.25) |
| rs7951033   | 77534444 | G/A | 0.07 | 0.08 | 0.4504                | 0.85 (0.56-1.29) |
| rs35711367  | 77536441 | C/T | 0.32 | 0.24 | 0.0020                | 1.46 (1.15-1.85) |
| rs12417232  | 77539085 | A/G | 0.25 | 0.16 | $2.98 \times 10^{-5}$ | 1.74 (1.34-2.25) |
| rs7126909   | 77540949 | T/C | 0.25 | 0.16 | $2.92 \times 10^{-5}$ | 1.74 (1.34-2.25) |
| rs17135905  | 77545870 | C/A | 0.25 | 0.16 | $3.03 \times 10^{-5}$ | 1.74 (1.34-2.25) |
| rs12417760  | 77551096 | A/G | 0.25 | 0.16 | $2.98 \times 10^{-5}$ | 1.74 (1.34-2.25) |
| rs12422061  | 77551303 | G/A | 0.03 | 0.04 | 0.3193                | 0.72 (0.38-1.38) |
| rs648896    | 77551500 | T/C | 0.07 | 0.08 | 0.4952                | 0.86 (0.56-1.31) |
| rs4944176   | 77552987 | C/T | 0.25 | 0.16 | $2.98 \times 10^{-5}$ | 1.74 (1.34-2.25) |
| rs621456    | 77553030 | T/C | 0.07 | 0.08 | 0.4952                | 0.86 (0.56-1.31) |
| rs585721    | 77553638 | C/T | 0.32 | 0.24 | 0.0022                | 1.46 (1.15-1.84) |
| rs601551    | 77554821 | A/G | 0.32 | 0.24 | 0.0021                | 1.46 (1.15-1.85) |
| rs7110322   | 77554945 | T/G | 0.25 | 0.16 | $2.98 \times 10^{-5}$ | 1.74 (1.34-2.25) |
| rs1790246   | 77555356 | A/G | 0.23 | 0.25 | 0.4662                | 0.91 (0.70-1.18) |
| rs634477    | 77559011 | A/G | 0.45 | 0.50 | 0.0576                | 0.81 (0.65-1.01) |
| rs1793340   | 77560323 | A/G | 0.45 | 0.50 | 0.0576                | 0.81 (0.65-1.01) |
| rs598071    | 77560652 | T/G | 0.07 | 0.08 | 0.4504                | 0.85 (0.56-1.29) |
| rs2508184   | 77562033 | A/G | 0.32 | 0.24 | 0.0019                | 1.46 (1.15-1.85) |
| rs694893    | 77563344 | T/C | 0.32 | 0.24 | 0.0019                | 1.46 (1.15-1.85) |
| rs12418551  | 77565877 | T/C | 0.25 | 0.16 | $2.77 \times 10^{-5}$ | 1.74 (1.35-2.25) |
| rs12420290  | 77566054 | G/A | 0.25 | 0.16 | $2.77 \times 10^{-5}$ | 1.74 (1.35-2.25) |
| rs647235    | 77566849 | G/A | 0.32 | 0.24 | 0.0019                | 1.46 (1.15-1.85) |
| rs24356     | 77567528 | T/C | 0.07 | 0.08 | 0.4504                | 0.85 (0.56-1.29) |
| rs3886195   | 77567584 | A/G | 0.25 | 0.16 | $2.77 \times 10^{-5}$ | 1.74 (1.35-2.25) |
| rs685474    | 77567681 | T/C | 0.32 | 0.24 | 0.0019                | 1.46 (1.15-1.85) |
| rs12285765  | 77569035 | T/C | 0.07 | 0.08 | 0.4504                | 0.85 (0.56-1.29) |
| rs4491258   | 77569110 | T/G | 0.25 | 0.16 | $2.77 \times 10^{-5}$ | 1.74 (1.35-2.25) |
| rs600968    | 77569784 | C/T | 0.32 | 0.24 | 0.0019                | 1.46 (1.15-1.85) |
| rs1783544   | 77572468 | T/C | 0.07 | 0.08 | 0.4732                | 0.85 (0.56-1.30) |
| rs636971    | 77574249 | T/C | 0.07 | 0.08 | 0.5561                | 0.88 (0.58-1.34) |

|             |          |     |      |      |                       |                  |
|-------------|----------|-----|------|------|-----------------------|------------------|
| rs584732    | 77574605 | T/C | 0.32 | 0.24 | 0.0019                | 1.46 (1.16-1.86) |
| rs76393422  | 77574910 | A/G | 0.03 | 0.04 | 0.3441                | 0.73 (0.38-1.40) |
| rs599962    | 77575639 | T/C | 0.32 | 0.24 | 0.0019                | 1.46 (1.15-1.85) |
| rs12574507  | 77575641 | A/G | 0.25 | 0.16 | $2.77 \times 10^{-5}$ | 1.74 (1.35-2.25) |
| rs1793341   | 77575977 | T/C | 0.23 | 0.25 | 0.3799                | 0.89 (0.69-1.16) |
| rs628668    | 77577494 | T/C | 0.07 | 0.08 | 0.4504                | 0.85 (0.56-1.29) |
| rs603462    | 77577864 | A/C | 0.32 | 0.24 | 0.0019                | 1.46 (1.15-1.85) |
| rs694845    | 77579747 | G/T | 0.07 | 0.08 | 0.4644                | 0.85 (0.56-1.30) |
| rs667213    | 77580995 | A/G | 0.32 | 0.24 | 0.0019                | 1.46 (1.15-1.85) |
| rs4448713   | 77581444 | A/G | 0.25 | 0.16 | $2.77 \times 10^{-5}$ | 1.74 (1.35-2.25) |
| rs113853065 | 77581644 | G/A | 0.25 | 0.16 | $2.77 \times 10^{-5}$ | 1.74 (1.35-2.25) |
| rs591283    | 77582743 | T/C | 0.32 | 0.24 | 0.0019                | 1.46 (1.15-1.85) |
| rs2186564   | 77583266 | A/G | 0.25 | 0.16 | $2.40 \times 10^{-5}$ | 1.75 (1.35-2.27) |
| rs588217    | 77583376 | A/G | 0.07 | 0.08 | 0.4504                | 0.85 (0.56-1.29) |
| rs668701    | 77583476 | A/G | 0.07 | 0.08 | 0.5042                | 0.86 (0.57-1.32) |
| rs667225    | 77583855 | C/A | 0.07 | 0.08 | 0.4504                | 0.85 (0.56-1.29) |
| rs611671    | 77584138 | T/C | 0.32 | 0.24 | 0.0018                | 1.47 (1.16-1.86) |
| rs1783546   | 77584647 | T/C | 0.23 | 0.25 | 0.4191                | 0.90 (0.69-1.17) |
| rs598933    | 77586358 | A/G | 0.32 | 0.24 | 0.0018                | 1.47 (1.16-1.86) |
| rs636041    | 77586409 | A/G | 0.32 | 0.24 | 0.0018                | 1.47 (1.16-1.86) |
| rs648601    | 77586910 | G/A | 0.07 | 0.08 | 0.4490                | 0.85 (0.56-1.29) |
| rs616354    | 77587973 | T/C | 0.56 | 0.49 | 0.0235                | 1.29 (1.04-1.61) |
| rs72939439  | 77589649 | G/A | 0.24 | 0.16 | $3.26 \times 10^{-5}$ | 1.74 (1.34-2.25) |
| rs663674    | 77592522 | G/A | 0.07 | 0.08 | 0.4449                | 0.84 (0.55-1.29) |
| rs947841    | 77592909 | A/G | 0.07 | 0.08 | 0.4312                | 0.84 (0.55-1.28) |
| rs4945223   | 77592945 | G/T | 0.25 | 0.16 | $2.56 \times 10^{-5}$ | 1.75 (1.35-2.26) |
| rs4944178   | 77593221 | T/C | 0.25 | 0.16 | $2.56 \times 10^{-5}$ | 1.75 (1.35-2.26) |
| rs60208812  | 77593347 | G/A | 0.25 | 0.16 | $2.56 \times 10^{-5}$ | 1.75 (1.35-2.26) |
| rs695046    | 77594354 | G/A | 0.07 | 0.09 | 0.4179                | 0.84 (0.55-1.27) |
| rs2051484   | 77595080 | T/C | 0.24 | 0.16 | $5.94 \times 10^{-5}$ | 1.72 (1.32-2.23) |
| rs608389    | 77595642 | G/A | 0.32 | 0.24 | 0.0020                | 1.46 (1.15-1.85) |
| rs658398    | 77595717 | T/C | 0.32 | 0.24 | 0.0020                | 1.46 (1.15-1.85) |
| rs687037    | 77596104 | A/C | 0.07 | 0.08 | 0.4114                | 0.83 (0.54-1.28) |
| rs581807    | 77596773 | A/G | 0.32 | 0.24 | 0.0021                | 1.46 (1.15-1.85) |
| rs108843    | 77597486 | T/C | 0.32 | 0.24 | 0.0019                | 1.46 (1.16-1.86) |
| rs141335075 | 77599576 | C/T | 0.25 | 0.16 | $1.62 \times 10^{-5}$ | 1.77 (1.37-2.29) |
| rs10899414  | 77599916 | A/G | 0.32 | 0.24 | 0.0014                | 1.48 (1.17-1.87) |
| rs113671826 | 77600361 | G/A | 0.25 | 0.16 | $1.88 \times 10^{-5}$ | 1.76 (1.36-2.28) |
| rs670090    | 77602673 | G/A | 0.07 | 0.08 | 0.4823                | 0.86 (0.56-1.30) |
| rs4245455   | 77603520 | C/T | 0.25 | 0.16 | $1.02 \times 10^{-5}$ | 1.79 (1.39-2.32) |
| rs1790244   | 77617950 | G/A | 0.37 | 0.40 | 0.2684                | 0.88 (0.70-1.10) |
| rs1793344   | 77618066 | T/C | 0.37 | 0.40 | 0.2624                | 0.88 (0.70-1.10) |
| rs1790245   | 77618441 | A/G | 0.37 | 0.40 | 0.2678                | 0.88 (0.70-1.10) |
| rs1790256   | 77620340 | C/T | 0.37 | 0.40 | 0.2612                | 0.88 (0.70-1.10) |
| rs10899415  | 77623873 | C/T | 0.38 | 0.40 | 0.2852                | 0.88 (0.71-1.11) |
| rs1793331   | 77625655 | C/T | 0.38 | 0.40 | 0.2909                | 0.89 (0.71-1.11) |
| rs1793338   | 77651786 | C/T | 0.38 | 0.40 | 0.3234                | 0.89 (0.71-1.12) |
| rs7115801   | 77661518 | A/G | 0.12 | 0.14 | 0.3175                | 0.84 (0.60-1.18) |
| rs12789522  | 77661805 | G/A | 0.38 | 0.40 | 0.3695                | 0.90 (0.72-1.13) |
| rs112788380 | 77662362 | T/G | 0.12 | 0.14 | 0.3175                | 0.84 (0.60-1.18) |
| rs12279880  | 77666487 | T/C | 0.12 | 0.14 | 0.2908                | 0.83 (0.59-1.17) |
| rs11826938  | 77667682 | T/C | 0.50 | 0.45 | 0.1152                | 1.19 (0.96-1.49) |
| rs11559637  | 77667979 | A/G | 0.37 | 0.40 | 0.2998                | 0.89 (0.71-1.11) |
| rs11501934  | 77668019 | T/C | 0.12 | 0.14 | 0.2639                | 0.82 (0.59-1.15) |
| rs4123593   | 77669985 | G/A | 0.12 | 0.14 | 0.2375                | 0.81 (0.58-1.14) |

|            |          |     |      |      |        |                  |
|------------|----------|-----|------|------|--------|------------------|
| rs4123595  | 77670112 | G/A | 0.12 | 0.14 | 0.2375 | 0.81 (0.58-1.14) |
| rs1823507  | 77670237 | T/C | 0.12 | 0.14 | 0.2375 | 0.81 (0.58-1.14) |
| rs72939500 | 77671217 | G/A | 0.12 | 0.14 | 0.2343 | 0.81 (0.58-1.14) |
| rs12796422 | 77671281 | G/A | 0.38 | 0.41 | 0.4215 | 0.91 (0.73-1.14) |
| rs2305317  | 77671544 | C/T | 0.12 | 0.14 | 0.2331 | 0.81 (0.58-1.14) |
| rs7929510  | 77671868 | C/T | 0.50 | 0.45 | 0.0918 | 1.21 (0.97-1.50) |
| rs7950529  | 77672314 | C/T | 0.38 | 0.40 | 0.3801 | 0.90 (0.72-1.13) |
| rs7115539  | 77673840 | T/C | 0.38 | 0.40 | 0.3413 | 0.90 (0.72-1.12) |
| rs9630225  | 77675723 | A/G | 0.12 | 0.14 | 0.2396 | 0.81 (0.58-1.14) |
| rs6592751  | 77675945 | C/T | 0.38 | 0.40 | 0.3938 | 0.91 (0.72-1.14) |
| rs11237338 | 77678541 | T/C | 0.12 | 0.14 | 0.2454 | 0.82 (0.58-1.14) |
| rs12807406 | 77680399 | T/G | 0.30 | 0.34 | 0.1667 | 0.85 (0.67-1.07) |
| rs2187564  | 77682279 | A/C | 0.37 | 0.40 | 0.3142 | 0.89 (0.71-1.12) |
| rs58992562 | 77683319 | G/A | 0.26 | 0.20 | 0.0041 | 1.45 (1.12-1.86) |
| rs12799701 | 77684136 | T/C | 0.12 | 0.14 | 0.2449 | 0.82 (0.58-1.14) |
| rs72941328 | 77684948 | T/C | 0.26 | 0.20 | 0.0042 | 1.45 (1.12-1.86) |
| rs7101610  | 77685224 | T/C | 0.51 | 0.46 | 0.0735 | 1.22 (0.98-1.52) |
| rs72941332 | 77685936 | A/G | 0.12 | 0.14 | 0.2339 | 0.81 (0.58-1.14) |
| rs11823006 | 77685996 | C/T | 0.38 | 0.40 | 0.3821 | 0.90 (0.72-1.13) |
| rs10899419 | 77686775 | A/G | 0.38 | 0.40 | 0.4217 | 0.91 (0.73-1.14) |
| rs72941334 | 77687198 | C/T | 0.26 | 0.20 | 0.0042 | 1.45 (1.12-1.86) |
| rs11237341 | 77687737 | A/G | 0.12 | 0.14 | 0.2526 | 0.82 (0.59-1.15) |
| rs72941336 | 77688244 | T/C | 0.26 | 0.20 | 0.0042 | 1.45 (1.12-1.86) |
| rs72941337 | 77688441 | A/C | 0.26 | 0.20 | 0.0042 | 1.45 (1.12-1.86) |
| rs10899420 | 77688774 | A/G | 0.51 | 0.46 | 0.0727 | 1.22 (0.98-1.52) |
| rs72941339 | 77688940 | G/T | 0.12 | 0.14 | 0.2600 | 0.82 (0.59-1.15) |
| rs12289316 | 77689297 | T/G | 0.12 | 0.15 | 0.2333 | 0.81 (0.58-1.14) |
| rs3740681  | 77690426 | C/T | 0.26 | 0.20 | 0.0052 | 1.44 (1.11-1.85) |
| rs17825404 | 77692775 | T/G | 0.12 | 0.14 | 0.2383 | 0.81 (0.58-1.14) |
| rs11237342 | 77693174 | T/C | 0.07 | 0.06 | 0.3759 | 1.21 (0.79-1.87) |
| rs10793267 | 77693272 | C/T | 0.50 | 0.45 | 0.0900 | 1.21 (0.97-1.51) |
| rs11237343 | 77693435 | T/C | 0.50 | 0.45 | 0.0925 | 1.21 (0.97-1.50) |
| rs72941350 | 77693579 | T/C | 0.26 | 0.20 | 0.0042 | 1.45 (1.12-1.86) |
| rs6592754  | 77694362 | A/G | 0.50 | 0.45 | 0.0881 | 1.21 (0.97-1.51) |
| rs11601908 | 77694544 | T/C | 0.38 | 0.40 | 0.3856 | 0.91 (0.72-1.14) |
| rs72941353 | 77695894 | T/C | 0.12 | 0.14 | 0.2370 | 0.81 (0.58-1.14) |
| rs2016147  | 77705536 | A/C | 0.25 | 0.18 | 0.0043 | 1.46 (1.13-1.89) |
| rs921383   | 77710841 | A/G | 0.29 | 0.30 | 0.6945 | 0.95 (0.75-1.21) |
| rs11237353 | 77714746 | A/C | 0.31 | 0.25 | 0.0176 | 1.34 (1.06-1.70) |
| rs17136094 | 77715627 | C/T | 0.10 | 0.12 | 0.1711 | 0.77 (0.54-1.11) |
| rs56360479 | 77718711 | T/C | 0.10 | 0.12 | 0.2561 | 0.81 (0.56-1.16) |
| rs10899425 | 77718712 | A/G | 0.31 | 0.25 | 0.0268 | 1.32 (1.04-1.67) |
| rs11601778 | 77719708 | C/T | 0.32 | 0.26 | 0.0200 | 1.33 (1.05-1.68) |
| rs12577359 | 77723797 | T/C | 0.32 | 0.27 | 0.0307 | 1.30 (1.03-1.65) |
| rs7930865  | 77724674 | T/C | 0.42 | 0.39 | 0.2539 | 1.14 (0.91-1.42) |
| rs72943018 | 77725515 | T/C | 0.10 | 0.12 | 0.2118 | 0.79 (0.54-1.14) |
| rs73503585 | 77726979 | C/T | 0.10 | 0.12 | 0.1917 | 0.78 (0.54-1.13) |
| rs72943021 | 77727038 | T/C | 0.10 | 0.12 | 0.2020 | 0.78 (0.54-1.13) |
| rs3824865  | 77727379 | C/T | 0.10 | 0.12 | 0.1921 | 0.78 (0.54-1.13) |
| rs57903322 | 77731160 | A/C | 0.05 | 0.08 | 0.0352 | 0.59 (0.36-0.97) |
| rs7937238  | 77731416 | C/T | 0.51 | 0.49 | 0.6216 | 1.06 (0.85-1.32) |
| rs2034500  | 77731755 | C/T | 0.51 | 0.49 | 0.6157 | 1.06 (0.85-1.32) |
| rs11237359 | 77732637 | C/A | 0.45 | 0.41 | 0.1452 | 1.18 (0.94-1.47) |

SNP, single nucleotide polymorphism; BP, base position; MAF, minor allele frequency; TPP, thyrotoxic hypokalemic periodic paralysis; OR, odds ratio; CI, confidence interval.

**eTable 7. TPP association results for the imputed and typed SNPs in the 17q24.3 region in the initial genome-wide scan**

| SNP        | BP       | Alleles | MAF_TPP | MAF_Controls | <i>P</i> | OR (95%CI)       |
|------------|----------|---------|---------|--------------|----------|------------------|
| rs11077471 | 68085547 | T/G     | 0.05    | 0.04         | 0.3144   | 1.31 (0.77-2.22) |
| rs12051811 | 68085573 | T/G     | 0.05    | 0.04         | 0.3253   | 1.30 (0.77-2.21) |
| rs11077472 | 68085673 | C/T     | 0.05    | 0.04         | 0.3253   | 1.30 (0.77-2.21) |
| rs7209824  | 68085815 | C/T     | 0.05    | 0.04         | 0.3253   | 1.30 (0.77-2.21) |
| rs2366290  | 68086796 | C/T     | 0.05    | 0.04         | 0.2358   | 1.36 (0.82-2.28) |
| rs9911757  | 68087687 | C/T     | 0.05    | 0.04         | 0.1780   | 1.41 (0.85-2.32) |
| rs8072570  | 68087909 | A/G     | 0.05    | 0.04         | 0.1786   | 1.41 (0.85-2.32) |
| rs8072498  | 68088221 | C/T     | 0.05    | 0.04         | 0.1780   | 1.41 (0.85-2.32) |
| rs8077474  | 68088505 | T/C     | 0.05    | 0.04         | 0.1786   | 1.41 (0.85-2.32) |
| rs8182292  | 68088567 | C/A     | 0.05    | 0.04         | 0.1798   | 1.40 (0.85-2.31) |
| rs8182294  | 68088612 | C/T     | 0.05    | 0.04         | 0.1780   | 1.41 (0.85-2.32) |
| rs12709248 | 68088771 | C/T     | 0.05    | 0.04         | 0.1930   | 1.39 (0.84-2.29) |
| rs12709249 | 68088884 | A/G     | 0.05    | 0.04         | 0.1930   | 1.39 (0.84-2.29) |
| rs12709250 | 68088953 | G/A     | 0.05    | 0.04         | 0.1937   | 1.39 (0.84-2.29) |
| rs4433847  | 68089273 | G/A     | 0.05    | 0.04         | 0.1930   | 1.39 (0.84-2.29) |
| rs9892289  | 68089452 | T/C     | 0.05    | 0.04         | 0.1930   | 1.39 (0.84-2.29) |
| rs2886632  | 68089902 | T/G     | 0.05    | 0.04         | 0.1930   | 1.39 (0.84-2.29) |
| rs7207387  | 68089989 | A/G     | 0.04    | 0.03         | 0.4901   | 1.23 (0.69-2.19) |
| rs7207528  | 68090053 | A/G     | 0.05    | 0.04         | 0.1930   | 1.39 (0.84-2.29) |
| rs6501367  | 68090128 | T/G     | 0.05    | 0.04         | 0.1930   | 1.39 (0.84-2.29) |
| rs6501368  | 68090181 | T/G     | 0.05    | 0.04         | 0.1930   | 1.39 (0.84-2.29) |
| rs11867479 | 68090207 | C/T     | 0.43    | 0.43         | 0.9199   | 1.01 (0.81-1.26) |
| rs6501369  | 68090269 | C/T     | 0.05    | 0.04         | 0.1930   | 1.39 (0.84-2.29) |
| rs6501370  | 68090318 | G/A     | 0.05    | 0.04         | 0.1930   | 1.39 (0.84-2.29) |
| rs8065574  | 68090615 | A/G     | 0.05    | 0.04         | 0.1930   | 1.39 (0.84-2.29) |
| rs8082547  | 68090671 | G/T     | 0.05    | 0.04         | 0.1930   | 1.39 (0.84-2.29) |
| rs8069797  | 68090674 | T/C     | 0.05    | 0.04         | 0.1930   | 1.39 (0.84-2.29) |
| rs8069195  | 68090846 | C/T     | 0.05    | 0.04         | 0.2015   | 1.38 (0.84-2.28) |
| rs8069571  | 68091130 | C/A     | 0.04    | 0.03         | 0.4901   | 1.23 (0.69-2.19) |
| rs8070321  | 68091225 | A/C     | 0.05    | 0.04         | 0.1930   | 1.39 (0.84-2.29) |
| rs8070915  | 68091561 | A/G     | 0.05    | 0.04         | 0.1930   | 1.39 (0.84-2.29) |
| rs8069216  | 68091598 | G/A     | 0.05    | 0.04         | 0.1930   | 1.39 (0.84-2.29) |
| rs8069368  | 68091654 | G/A     | 0.05    | 0.04         | 0.1930   | 1.39 (0.84-2.29) |
| rs8070530  | 68091676 | C/T     | 0.05    | 0.04         | 0.1930   | 1.39 (0.84-2.29) |
| rs8075045  | 68091932 | A/C     | 0.05    | 0.04         | 0.1488   | 1.43 (0.88-2.32) |
| rs8074582  | 68091952 | C/A     | 0.05    | 0.04         | 0.2009   | 1.38 (0.84-2.28) |
| rs12942690 | 68092322 | C/A     | 0.05    | 0.04         | 0.2015   | 1.38 (0.84-2.28) |
| rs2190607  | 68092752 | T/C     | 0.05    | 0.04         | 0.2009   | 1.38 (0.84-2.28) |
| rs7224070  | 68093044 | A/G     | 0.05    | 0.04         | 0.2009   | 1.38 (0.84-2.28) |
| rs7222323  | 68093060 | G/T     | 0.05    | 0.04         | 0.2009   | 1.38 (0.84-2.28) |
| rs7223856  | 68093286 | C/T     | 0.05    | 0.04         | 0.1290   | 1.45 (0.89-2.37) |
| rs11077473 | 68093353 | C/T     | 0.05    | 0.04         | 0.1295   | 1.45 (0.89-2.37) |
| rs11077474 | 68093376 | A/G     | 0.04    | 0.03         | 0.3479   | 1.31 (0.75-2.29) |
| rs11077476 | 68093427 | T/C     | 0.05    | 0.04         | 0.1290   | 1.45 (0.89-2.37) |
| rs10221235 | 68093912 | T/C     | 0.05    | 0.04         | 0.2109   | 1.37 (0.83-2.26) |
| rs10221237 | 68094026 | T/C     | 0.05    | 0.04         | 0.1290   | 1.45 (0.89-2.37) |



|            |          |     |      |      |        |                  |
|------------|----------|-----|------|------|--------|------------------|
| rs9302911  | 68094230 | C/T | 0.04 | 0.03 | 0.3479 | 1.31 (0.75-2.29) |
| rs724824   | 68095619 | G/T | 0.04 | 0.03 | 0.3479 | 1.31 (0.75-2.29) |
| rs724825   | 68095623 | T/G | 0.04 | 0.03 | 0.3479 | 1.31 (0.75-2.29) |
| rs6501375  | 68096658 | T/C | 0.04 | 0.03 | 0.3479 | 1.31 (0.75-2.29) |
| rs7226242  | 68096908 | A/G | 0.05 | 0.04 | 0.1290 | 1.45 (0.89-2.37) |
| rs7226144  | 68097181 | C/T | 0.04 | 0.03 | 0.3479 | 1.31 (0.75-2.29) |
| rs9890060  | 68102331 | C/T | 0.40 | 0.39 | 0.6835 | 1.05 (0.84-1.31) |
| rs4968796  | 68103347 | C/T | 0.38 | 0.38 | 0.9674 | 1.00 (0.79-1.25) |
| rs3785902  | 68108118 | C/T | 0.36 | 0.40 | 0.2099 | 0.86 (0.69-1.09) |
| rs12936361 | 68108417 | C/T | 0.34 | 0.31 | 0.3941 | 1.11 (0.88-1.40) |
| rs8079768  | 68114959 | C/T | 0.23 | 0.19 | 0.1203 | 1.23 (0.95-1.60) |
| rs9909905  | 68115346 | T/C | 0.23 | 0.19 | 0.0635 | 1.28 (0.99-1.66) |
| rs9897883  | 68116951 | G/A | 0.23 | 0.19 | 0.1240 | 1.23 (0.95-1.61) |
| rs9897311  | 68117095 | T/C | 0.23 | 0.19 | 0.1186 | 1.24 (0.95-1.61) |
| rs12943869 | 68120806 | A/G | 0.43 | 0.50 | 0.0140 | 0.75 (0.61-0.94) |
| rs3826428  | 68131048 | G/T | 0.14 | 0.11 | 0.1144 | 1.30 (0.94-1.79) |
| rs6788     | 68131526 | T/C | 0.13 | 0.09 | 0.0433 | 1.41 (1.01-1.96) |
| rs2366489  | 68133764 | T/C | 0.14 | 0.11 | 0.0861 | 1.32 (0.96-1.81) |
| rs2158967  | 68133865 | T/C | 0.14 | 0.11 | 0.0705 | 1.34 (0.97-1.84) |
| rs17702078 | 68134618 | C/T | 0.14 | 0.11 | 0.0709 | 1.33 (0.97-1.83) |
| rs7217293  | 68135294 | C/T | 0.14 | 0.11 | 0.0978 | 1.30 (0.95-1.79) |
| rs7217947  | 68135696 | C/T | 0.14 | 0.11 | 0.0950 | 1.31 (0.95-1.79) |
| rs4405595  | 68135740 | T/C | 0.14 | 0.11 | 0.0950 | 1.31 (0.95-1.79) |
| rs7208531  | 68137138 | C/T | 0.14 | 0.11 | 0.0967 | 1.30 (0.95-1.79) |
| rs16975251 | 68137167 | A/G | 0.31 | 0.27 | 0.1292 | 1.20 (0.95-1.52) |
| rs67891720 | 68137788 | G/A | 0.31 | 0.27 | 0.1355 | 1.20 (0.94-1.52) |
| rs71375771 | 68138343 | T/G | 0.14 | 0.11 | 0.0950 | 1.31 (0.95-1.79) |
| rs9912069  | 68138833 | G/A | 0.14 | 0.11 | 0.0950 | 1.31 (0.95-1.79) |
| rs9896573  | 68139044 | C/T | 0.14 | 0.11 | 0.0893 | 1.31 (0.96-1.80) |
| rs9788982  | 68139785 | G/A | 0.14 | 0.11 | 0.1059 | 1.30 (0.94-1.79) |
| rs6501379  | 68140040 | C/T | 0.14 | 0.11 | 0.1070 | 1.30 (0.94-1.78) |
| rs71375772 | 68141674 | C/T | 0.14 | 0.11 | 0.1026 | 1.30 (0.94-1.79) |
| rs34237612 | 68142113 | C/T | 0.14 | 0.11 | 0.1026 | 1.30 (0.94-1.79) |
| rs35391414 | 68142724 | T/C | 0.14 | 0.11 | 0.1026 | 1.30 (0.94-1.79) |
| rs28415525 | 68143434 | G/A | 0.14 | 0.11 | 0.1049 | 1.30 (0.94-1.79) |
| rs4968884  | 68143989 | T/C | 0.14 | 0.11 | 0.1049 | 1.30 (0.94-1.79) |
| rs4968798  | 68144096 | C/T | 0.14 | 0.11 | 0.1049 | 1.30 (0.94-1.79) |
| rs12451657 | 68146450 | T/C | 0.14 | 0.11 | 0.1087 | 1.29 (0.94-1.78) |
| rs34053437 | 68146727 | T/C | 0.14 | 0.11 | 0.1087 | 1.29 (0.94-1.78) |
| rs12945558 | 68147069 | T/C | 0.14 | 0.11 | 0.1094 | 1.29 (0.94-1.78) |
| rs12946552 | 68147438 | T/C | 0.14 | 0.11 | 0.1094 | 1.29 (0.94-1.78) |
| rs34136246 | 68147587 | C/T | 0.14 | 0.11 | 0.1094 | 1.29 (0.94-1.78) |
| rs8081486  | 68147928 | T/C | 0.14 | 0.11 | 0.1078 | 1.30 (0.94-1.78) |
| rs8082195  | 68148034 | G/A | 0.14 | 0.11 | 0.1094 | 1.29 (0.94-1.78) |
| rs8067870  | 68148119 | G/T | 0.14 | 0.11 | 0.1094 | 1.29 (0.94-1.78) |
| rs6501381  | 68148350 | C/T | 0.14 | 0.11 | 0.1138 | 1.29 (0.94-1.78) |
| rs12449606 | 68148811 | A/C | 0.14 | 0.11 | 0.1276 | 1.28 (0.93-1.76) |
| rs12452512 | 68149139 | C/A | 0.14 | 0.11 | 0.1250 | 1.28 (0.93-1.75) |
| rs16975266 | 68149253 | G/A | 0.14 | 0.11 | 0.1234 | 1.28 (0.93-1.76) |
| rs12453808 | 68150722 | C/T | 0.14 | 0.11 | 0.1226 | 1.28 (0.93-1.76) |
| rs9915368  | 68151112 | G/A | 0.14 | 0.11 | 0.1226 | 1.28 (0.93-1.76) |
| rs77388117 | 68151469 | T/C | 0.14 | 0.11 | 0.1458 | 1.26 (0.92-1.74) |

|            |          |     |      |      |        |                  |
|------------|----------|-----|------|------|--------|------------------|
| rs12952229 | 68151736 | T/C | 0.14 | 0.11 | 0.1226 | 1.28 (0.93-1.76) |
| rs1558100  | 68152714 | T/C | 0.14 | 0.11 | 0.1226 | 1.28 (0.93-1.76) |
| rs7215060  | 68153664 | T/C | 0.14 | 0.11 | 0.1173 | 1.29 (0.94-1.76) |
| rs3944089  | 68155155 | T/C | 0.14 | 0.11 | 0.1226 | 1.28 (0.93-1.76) |
| rs28688305 | 68157325 | A/G | 0.14 | 0.11 | 0.1226 | 1.28 (0.93-1.76) |
| rs75653467 | 68157524 | C/T | 0.14 | 0.11 | 0.1458 | 1.26 (0.92-1.74) |
| rs2058063  | 68157840 | C/T | 0.14 | 0.11 | 0.1226 | 1.28 (0.93-1.76) |
| rs10512536 | 68158248 | C/T | 0.14 | 0.11 | 0.1488 | 1.26 (0.92-1.74) |
| rs4968800  | 68158877 | C/T | 0.14 | 0.11 | 0.1458 | 1.26 (0.92-1.74) |
| rs4968886  | 68159501 | C/T | 0.14 | 0.11 | 0.1386 | 1.27 (0.92-1.75) |
| rs4968801  | 68159800 | G/A | 0.14 | 0.11 | 0.1226 | 1.28 (0.93-1.76) |
| rs76368932 | 68160311 | T/C | 0.14 | 0.11 | 0.1226 | 1.28 (0.93-1.76) |
| rs8066863  | 68160901 | G/A | 0.14 | 0.11 | 0.1226 | 1.28 (0.93-1.76) |
| rs34366352 | 68161384 | C/T | 0.14 | 0.11 | 0.1175 | 1.28 (0.94-1.76) |
| rs12452852 | 68161876 | C/A | 0.14 | 0.11 | 0.1175 | 1.28 (0.94-1.76) |
| rs9896657  | 68177717 | A/G | 0.47 | 0.43 | 0.1661 | 1.17 (0.94-1.45) |
| rs4328485  | 68177765 | A/C | 0.47 | 0.43 | 0.1949 | 1.15 (0.93-1.44) |
| rs236519   | 68179786 | C/T | 0.01 | 0.04 | 0.0260 | 0.37 (0.15-0.91) |
| rs8079702  | 68190826 | G/A | 0.39 | 0.41 | 0.4112 | 0.91 (0.73-1.14) |
| rs1514239  | 68196045 | T/C | 0.46 | 0.45 | 0.9521 | 1.01 (0.81-1.26) |
| rs12601653 | 68198835 | A/G | 0.06 | 0.06 | 0.6994 | 1.09 (0.70-1.71) |
| rs1468473  | 68201359 | T/C | 0.40 | 0.41 | 0.6430 | 0.95 (0.76-1.19) |
| rs236585   | 68202513 | T/C | 0.45 | 0.45 | 0.9783 | 1.00 (0.81-1.25) |
| rs11871843 | 68202722 | T/C | 0.02 | 0.02 | 0.6769 | 0.84 (0.36-1.93) |
| rs236587   | 68203915 | T/C | 0.45 | 0.45 | 0.9515 | 0.99 (0.80-1.24) |
| rs62069106 | 68206592 | G/A | 0.02 | 0.02 | 0.6088 | 0.80 (0.35-1.85) |
| rs236593   | 68207310 | T/C | 0.45 | 0.45 | 0.9272 | 1.01 (0.81-1.26) |
| rs236594   | 68207627 | A/G | 0.45 | 0.45 | 0.8909 | 1.02 (0.81-1.27) |
| rs8075014  | 68208200 | G/A | 0.02 | 0.02 | 0.6088 | 0.80 (0.35-1.85) |
| rs62069108 | 68208414 | A/G | 0.16 | 0.15 | 0.6706 | 1.07 (0.79-1.45) |
| rs62069109 | 68208690 | A/G | 0.16 | 0.15 | 0.6706 | 1.07 (0.79-1.45) |
| rs8076345  | 68212550 | A/G | 0.16 | 0.15 | 0.5155 | 1.10 (0.82-1.48) |
| rs236523   | 68212642 | C/A | 0.38 | 0.39 | 0.4964 | 0.93 (0.74-1.16) |
| rs236528   | 68215590 | C/T | 0.42 | 0.45 | 0.2748 | 0.89 (0.71-1.11) |
| rs638538   | 68216128 | C/A | 0.44 | 0.47 | 0.2072 | 0.87 (0.70-1.09) |
| rs236530   | 68217471 | T/C | 0.43 | 0.47 | 0.2425 | 0.88 (0.70-1.10) |
| rs236531   | 68217860 | C/T | 0.30 | 0.32 | 0.4340 | 0.91 (0.72-1.16) |
| rs236532   | 68219001 | T/C | 0.30 | 0.32 | 0.4323 | 0.91 (0.72-1.16) |
| rs236533   | 68219033 | G/A | 0.44 | 0.47 | 0.2031 | 0.87 (0.70-1.08) |
| rs236534   | 68219222 | T/C | 0.28 | 0.30 | 0.5446 | 0.93 (0.73-1.18) |
| rs600741   | 68220218 | G/A | 0.29 | 0.32 | 0.3651 | 0.90 (0.70-1.14) |
| rs669319   | 68220226 | T/C | 0.30 | 0.32 | 0.4002 | 0.90 (0.71-1.15) |
| rs79139025 | 68220868 | G/A | 0.14 | 0.15 | 0.5989 | 0.92 (0.67-1.26) |
| rs656367   | 68220870 | C/T | 0.29 | 0.32 | 0.3272 | 0.89 (0.70-1.13) |
| rs2366491  | 68222235 | T/C | 0.14 | 0.15 | 0.7388 | 0.95 (0.69-1.30) |
| rs12150382 | 68222772 | A/G | 0.15 | 0.18 | 0.2529 | 0.84 (0.62-1.14) |
| rs9909591  | 68224379 | G/A | 0.14 | 0.15 | 0.3382 | 0.86 (0.62-1.18) |
| rs9896666  | 68226321 | T/C | 0.14 | 0.17 | 0.1570 | 0.80 (0.59-1.10) |
| rs236540   | 68226346 | G/A | 0.29 | 0.30 | 0.6983 | 0.95 (0.75-1.22) |
| rs236541   | 68226876 | T/C | 0.29 | 0.30 | 0.7143 | 0.96 (0.75-1.22) |
| rs236542   | 68227020 | C/T | 0.28 | 0.30 | 0.6249 | 0.94 (0.74-1.20) |
| rs79833792 | 68227600 | C/T | 0.14 | 0.16 | 0.3175 | 0.85 (0.62-1.17) |

|             |          |     |      |      |                        |                  |
|-------------|----------|-----|------|------|------------------------|------------------|
| rs236543    | 68228766 | C/T | 0.29 | 0.30 | 0.6493                 | 0.95 (0.74-1.21) |
| rs73388078  | 68229222 | A/G | 0.14 | 0.16 | 0.3053                 | 0.85 (0.62-1.17) |
| rs73388081  | 68229302 | A/G | 0.14 | 0.16 | 0.3053                 | 0.85 (0.62-1.17) |
| rs236544    | 68229691 | A/G | 0.28 | 0.29 | 0.6279                 | 0.94 (0.74-1.20) |
| rs236545    | 68229709 | C/T | 0.29 | 0.30 | 0.7426                 | 0.96 (0.76-1.22) |
| rs9908272   | 68229826 | C/A | 0.14 | 0.16 | 0.3053                 | 0.85 (0.62-1.17) |
| rs236547    | 68229995 | G/A | 0.29 | 0.30 | 0.6560                 | 0.95 (0.74-1.21) |
| rs9915538   | 68230544 | G/A | 0.14 | 0.17 | 0.1733                 | 0.81 (0.59-1.11) |
| rs236548    | 68231252 | A/G | 0.43 | 0.47 | 0.1650                 | 0.86 (0.69-1.07) |
| rs2886687   | 68231807 | C/T | 0.14 | 0.15 | 0.3629                 | 0.87 (0.63-1.19) |
| rs17703427  | 68232008 | G/A | 0.14 | 0.15 | 0.3629                 | 0.87 (0.63-1.19) |
| rs145338408 | 68233558 | C/T | 0.14 | 0.15 | 0.3720                 | 0.87 (0.63-1.19) |
| rs236596    | 68233954 | G/A | 0.27 | 0.29 | 0.5273                 | 0.92 (0.72-1.18) |
| rs10512538  | 68237670 | C/T | 0.01 | 0.02 | 0.2393                 | 0.59 (0.24-1.45) |
| rs59180775  | 68241227 | A/G | 0.14 | 0.15 | 0.3723                 | 0.87 (0.63-1.19) |
| rs999978    | 68242091 | T/C | 0.13 | 0.15 | 0.3054                 | 0.85 (0.62-1.17) |
| rs79929224  | 68244064 | A/C | 0.14 | 0.15 | 0.3956                 | 0.87 (0.64-1.20) |
| rs9903628   | 68257788 | A/G | 0.26 | 0.32 | 0.0127                 | 0.73 (0.57-0.94) |
| rs623011    | 68259446 | A/G | 0.63 | 0.47 | $1.19 \times 10^{-8}$  | 1.92 (1.53-2.41) |
| rs189428509 | 68261928 | A/G | 0.02 | 0.03 | 0.2531                 | 0.64 (0.30-1.38) |
| rs4968887   | 68264545 | T/C | 0.12 | 0.21 | $9.67 \times 10^{-5}$  | 0.53 (0.38-0.73) |
| rs236499    | 68266506 | G/A | 0.34 | 0.49 | $2.99 \times 10^{-8}$  | 0.53 (0.42-0.66) |
| rs236501    | 68267059 | A/G | 0.34 | 0.49 | $3.22 \times 10^{-8}$  | 0.53 (0.42-0.67) |
| rs12453707  | 68267496 | T/C | 0.10 | 0.17 | 0.0007                 | 0.55 (0.39-0.78) |
| rs7221161   | 68267720 | T/G | 0.34 | 0.49 | $4.78 \times 10^{-8}$  | 0.53 (0.42-0.67) |
| rs12453584  | 68267733 | A/G | 0.10 | 0.17 | 0.0007                 | 0.55 (0.39-0.78) |
| rs236504    | 68268736 | C/T | 0.22 | 0.29 | 0.0048                 | 0.69 (0.53-0.90) |
| rs8079210   | 68269140 | A/C | 0.34 | 0.49 | $2.00 \times 10^{-8}$  | 0.52 (0.42-0.66) |
| rs7223705   | 68269712 | A/C | 0.34 | 0.49 | $1.71 \times 10^{-8}$  | 0.52 (0.41-0.66) |
| rs180505    | 68269838 | G/A | 0.34 | 0.49 | $1.71 \times 10^{-8}$  | 0.52 (0.41-0.66) |
| rs9894659   | 68270649 | A/G | 0.22 | 0.28 | 0.0057                 | 0.70 (0.53-0.91) |
| rs1399185   | 68270955 | T/G | 0.34 | 0.49 | $1.92 \times 10^{-8}$  | 0.52 (0.42-0.66) |
| rs4389177   | 68271193 | T/C | 0.34 | 0.49 | $1.92 \times 10^{-8}$  | 0.52 (0.42-0.66) |
| rs4583288   | 68271196 | A/G | 0.22 | 0.29 | 0.0048                 | 0.69 (0.53-0.90) |
| rs1399184   | 68271273 | T/G | 0.34 | 0.49 | $1.92 \times 10^{-8}$  | 0.52 (0.42-0.66) |
| rs8075271   | 68272060 | A/G | 0.12 | 0.21 | $8.65 \times 10^{-5}$  | 0.52 (0.38-0.73) |
| rs8076950   | 68272078 | C/A | 0.12 | 0.21 | $8.65 \times 10^{-5}$  | 0.52 (0.38-0.73) |
| rs17714860  | 68272354 | G/A | 0.88 | 0.79 | $8.65 \times 10^{-5}$  | 1.91 (1.37-2.66) |
| rs62070060  | 68272544 | G/A | 0.12 | 0.21 | $9.00 \times 10^{-5}$  | 0.52 (0.38-0.73) |
| rs9892944   | 68273720 | A/G | 0.64 | 0.46 | $1.40 \times 10^{-10}$ | 2.07 (1.65-2.60) |
| rs11650230  | 68273753 | T/C | 0.12 | 0.21 | $9.32 \times 10^{-5}$  | 0.52 (0.38-0.73) |
| rs180506    | 68274205 | G/A | 0.64 | 0.46 | $8.42 \times 10^{-11}$ | 2.10 (1.67-2.64) |
| rs723498    | 68275532 | A/C | 0.24 | 0.33 | 0.0005                 | 0.64 (0.50-0.83) |
| rs723499    | 68275605 | C/T | 0.64 | 0.46 | $1.38 \times 10^{-10}$ | 2.07 (1.65-2.60) |
| rs723500    | 68275623 | T/C | 0.64 | 0.46 | $1.38 \times 10^{-10}$ | 2.07 (1.65-2.60) |
| rs8074548   | 68275724 | T/C | 0.10 | 0.18 | 0.0005                 | 0.54 (0.38-0.77) |
| rs723501    | 68275847 | A/G | 0.64 | 0.46 | $1.38 \times 10^{-10}$ | 2.07 (1.65-2.60) |
| rs7222891   | 68276108 | A/G | 0.64 | 0.46 | $1.38 \times 10^{-10}$ | 2.07 (1.65-2.60) |
| rs7221253   | 68276217 | G/A | 0.64 | 0.46 | $1.38 \times 10^{-10}$ | 2.07 (1.65-2.60) |
| rs28617256  | 68276235 | A/G | 0.24 | 0.33 | 0.0006                 | 0.65 (0.50-0.83) |
| rs78676535  | 68276485 | A/G | 0.02 | 0.03 | 0.1207                 | 0.53 (0.23-1.20) |
| rs4968888   | 68276731 | A/G | 0.64 | 0.46 | $1.38 \times 10^{-10}$ | 2.07 (1.65-2.60) |

|             |          |     |      |      |                        |                  |
|-------------|----------|-----|------|------|------------------------|------------------|
| rs236535    | 68277316 | C/T | 0.64 | 0.46 | $8.60 \times 10^{-11}$ | 2.10 (1.67-2.64) |
| rs6501383   | 68277932 | T/C | 0.64 | 0.46 | $1.38 \times 10^{-10}$ | 2.07 (1.65-2.60) |
| rs1828813   | 68278194 | A/G | 0.64 | 0.46 | $1.38 \times 10^{-10}$ | 2.07 (1.65-2.60) |
| rs1828814   | 68278250 | G/A | 0.64 | 0.47 | $3.24 \times 10^{-10}$ | 2.05 (1.63-2.57) |
| rs16975455  | 68278586 | T/C | 0.10 | 0.18 | 0.0005                 | 0.54 (0.38-0.77) |
| rs79347292  | 68278886 | T/G | 0.02 | 0.03 | 0.1207                 | 0.53 (0.23-1.20) |
| rs7208109   | 68278903 | G/A | 0.64 | 0.47 | $2.18 \times 10^{-10}$ | 2.05 (1.63-2.58) |
| rs2215027   | 68279437 | A/G | 0.10 | 0.18 | 0.0005                 | 0.54 (0.38-0.77) |
| rs12938938  | 68280430 | A/G | 0.64 | 0.46 | $1.38 \times 10^{-10}$ | 2.07 (1.65-2.60) |
| rs12939213  | 68280502 | A/G | 0.64 | 0.46 | $1.38 \times 10^{-10}$ | 2.07 (1.65-2.60) |
| rs75068344  | 68280737 | G/A | 0.02 | 0.03 | 0.1204                 | 0.53 (0.23-1.20) |
| rs312709    | 68281054 | G/A | 0.64 | 0.46 | $1.38 \times 10^{-10}$ | 2.07 (1.65-2.60) |
| rs312710    | 68281101 | C/T | 0.24 | 0.33 | 0.0005                 | 0.64 (0.50-0.83) |
| rs72631344  | 68281571 | T/C | 0.10 | 0.17 | 0.0007                 | 0.55 (0.39-0.78) |
| rs312712    | 68281835 | G/T | 0.64 | 0.46 | $1.40 \times 10^{-10}$ | 2.07 (1.65-2.60) |
| rs312713    | 68282064 | A/G | 0.64 | 0.46 | $1.40 \times 10^{-10}$ | 2.07 (1.65-2.60) |
| rs76244652  | 68282566 | T/C | 0.02 | 0.03 | 0.1207                 | 0.53 (0.23-1.20) |
| rs312715    | 68282845 | G/A | 0.64 | 0.46 | $1.40 \times 10^{-10}$ | 2.07 (1.65-2.60) |
| rs312718    | 68284376 | C/T | 0.64 | 0.46 | $1.40 \times 10^{-10}$ | 2.07 (1.65-2.60) |
| rs116189418 | 68285185 | G/A | 0.02 | 0.03 | 0.1207                 | 0.53 (0.23-1.20) |
| rs312719    | 68285294 | T/C | 0.64 | 0.46 | $1.40 \times 10^{-10}$ | 2.07 (1.65-2.60) |
| rs4968890   | 68286268 | T/C | 0.10 | 0.17 | 0.0007                 | 0.55 (0.39-0.78) |
| rs312721    | 68286361 | C/T | 0.64 | 0.46 | $1.40 \times 10^{-10}$ | 2.07 (1.65-2.60) |
| rs312723    | 68286979 | T/C | 0.24 | 0.33 | 0.0005                 | 0.64 (0.50-0.83) |
| rs312725    | 68288205 | T/C | 0.64 | 0.46 | $1.40 \times 10^{-10}$ | 2.07 (1.65-2.60) |
| rs312726    | 68288328 | C/A | 0.64 | 0.46 | $1.45 \times 10^{-10}$ | 2.07 (1.65-2.60) |
| rs77358052  | 68288607 | A/G | 0.02 | 0.03 | 0.1207                 | 0.53 (0.23-1.20) |
| rs312727    | 68288737 | T/C | 0.64 | 0.46 | $1.40 \times 10^{-10}$ | 2.07 (1.65-2.60) |
| rs312728    | 68289703 | A/G | 0.64 | 0.46 | $1.40 \times 10^{-10}$ | 2.07 (1.65-2.60) |
| rs11077488  | 68290082 | T/C | 0.10 | 0.17 | 0.0007                 | 0.55 (0.39-0.78) |
| rs112493021 | 68290533 | T/G | 0.02 | 0.03 | 0.1207                 | 0.53 (0.23-1.20) |
| rs4968891   | 68290551 | A/G | 0.10 | 0.17 | 0.0007                 | 0.55 (0.39-0.78) |
| rs407414    | 68290982 | G/T | 0.64 | 0.46 | $1.40 \times 10^{-10}$ | 2.07 (1.65-2.60) |
| rs6501384   | 68291133 | T/C | 0.10 | 0.18 | 0.0005                 | 0.54 (0.38-0.77) |
| rs411079    | 68291371 | C/A | 0.76 | 0.67 | 0.0005                 | 1.56 (1.21-2.01) |
| rs432241    | 68291674 | T/C | 0.64 | 0.46 | $1.40 \times 10^{-10}$ | 2.07 (1.65-2.60) |
| rs401070    | 68292119 | T/C | 0.64 | 0.46 | $1.40 \times 10^{-10}$ | 2.07 (1.65-2.60) |
| rs393743    | 68292157 | T/C | 0.64 | 0.46 | $1.40 \times 10^{-10}$ | 2.07 (1.65-2.60) |
| rs427309    | 68292713 | G/A | 0.24 | 0.32 | 0.0007                 | 0.65 (0.50-0.83) |
| rs427986    | 68292929 | A/C | 0.64 | 0.46 | $1.40 \times 10^{-10}$ | 2.08 (1.66-2.62) |
| rs683896    | 68293560 | T/C | 0.64 | 0.46 | $1.19 \times 10^{-10}$ | 2.09 (1.66-2.62) |
| rs655016    | 68294034 | C/T | 0.64 | 0.46 | $1.20 \times 10^{-10}$ | 2.09 (1.66-2.62) |
| rs7223796   | 68294560 | G/A | 0.64 | 0.46 | $1.21 \times 10^{-10}$ | 2.09 (1.66-2.62) |
| rs2573030   | 68294755 | T/C | 0.64 | 0.46 | $7.19 \times 10^{-11}$ | 2.10 (1.67-2.65) |
| rs2529682   | 68294976 | G/A | 0.64 | 0.46 | $7.19 \times 10^{-11}$ | 2.10 (1.67-2.65) |
| rs2529683   | 68294991 | T/C | 0.34 | 0.51 | $2.81 \times 10^{-9}$  | 0.50 (0.40-0.63) |
| rs6501385   | 68295062 | T/C | 0.64 | 0.46 | $6.58 \times 10^{-11}$ | 2.11 (1.68-2.65) |
| rs427373    | 68295085 | C/T | 0.64 | 0.46 | $6.58 \times 10^{-11}$ | 2.11 (1.68-2.65) |
| rs312692    | 68295241 | T/G | 0.64 | 0.46 | $6.58 \times 10^{-11}$ | 2.11 (1.68-2.65) |
| rs312698    | 68296575 | T/C | 0.64 | 0.46 | $9.99 \times 10^{-11}$ | 2.09 (1.66-2.63) |
| rs78231362  | 68296605 | C/T | 0.02 | 0.03 | 0.1077                 | 0.52 (0.23-1.18) |
| rs1606655   | 68296614 | G/T | 0.12 | 0.21 | 0.0001                 | 0.53 (0.38-0.74) |

|            |          |     |      |      |                        |                  |
|------------|----------|-----|------|------|------------------------|------------------|
| rs1606656  | 68296785 | T/C | 0.13 | 0.21 | 0.0001                 | 0.53 (0.38-0.74) |
| rs420572   | 68297360 | T/C | 0.64 | 0.46 | $1.07 \times 10^{-10}$ | 2.09 (1.66-2.63) |
| rs186362   | 68297408 | C/A | 0.23 | 0.33 | 0.0003                 | 0.62 (0.48-0.81) |
| rs188744   | 68297454 | G/A | 0.23 | 0.33 | 0.0003                 | 0.62 (0.48-0.81) |
| rs312699   | 68297537 | T/C | 0.23 | 0.33 | 0.0004                 | 0.63 (0.49-0.82) |
| rs312700   | 68297567 | T/C | 0.64 | 0.46 | $1.15 \times 10^{-10}$ | 2.09 (1.66-2.63) |
| rs76386494 | 68297750 | G/T | 0.02 | 0.03 | 0.1877                 | 0.60 (0.28-1.30) |
| rs60646596 | 68298093 | C/T | 0.11 | 0.18 | 0.0007                 | 0.55 (0.39-0.79) |
| rs192853   | 68298292 | G/A | 0.23 | 0.33 | 0.0003                 | 0.62 (0.48-0.81) |
| rs312703   | 68298992 | C/T | 0.64 | 0.46 | $1.37 \times 10^{-10}$ | 2.08 (1.66-2.62) |
| rs8078034  | 68299198 | A/G | 0.11 | 0.18 | 0.0007                 | 0.55 (0.39-0.79) |
| rs312704   | 68299201 | C/T | 0.64 | 0.46 | $1.15 \times 10^{-10}$ | 2.09 (1.66-2.63) |
| rs7222503  | 68299785 | G/T | 0.89 | 0.82 | 0.0007                 | 1.81 (1.27-2.56) |
| rs312707   | 68300636 | A/C | 0.23 | 0.33 | 0.0003                 | 0.62 (0.48-0.81) |
| rs72631347 | 68302616 | T/C | 0.10 | 0.17 | 0.0008                 | 0.55 (0.39-0.79) |
| rs78804406 | 68303195 | C/T | 0.02 | 0.03 | 0.1162                 | 0.52 (0.23-1.19) |
| rs7225313  | 68303286 | A/C | 0.10 | 0.18 | 0.0006                 | 0.55 (0.38-0.78) |
| rs2573032  | 68306092 | T/C | 0.65 | 0.47 | $1.96 \times 10^{-10}$ | 2.06 (1.64-2.59) |
| rs10163526 | 68306707 | G/A | 0.64 | 0.46 | $8.68 \times 10^{-11}$ | 2.09 (1.66-2.63) |
| rs312729   | 68306837 | A/G | 0.64 | 0.47 | $2.54 \times 10^{-10}$ | 2.05 (1.63-2.57) |
| rs2048677  | 68308227 | C/T | 0.64 | 0.46 | $1.29 \times 10^{-10}$ | 2.08 (1.65-2.61) |
| rs312730   | 68308334 | T/C | 0.64 | 0.47 | $1.86 \times 10^{-10}$ | 2.06 (1.64-2.59) |
| rs312731   | 68308709 | T/G | 0.64 | 0.47 | $1.96 \times 10^{-10}$ | 2.06 (1.64-2.59) |
| rs80076208 | 68309009 | T/C | 0.02 | 0.03 | 0.1074                 | 0.52 (0.23-1.18) |
| rs79488343 | 68309158 | T/C | 0.02 | 0.03 | 0.0995                 | 0.51 (0.22-1.16) |
| rs312732   | 68309320 | T/G | 0.64 | 0.47 | $1.96 \times 10^{-10}$ | 2.06 (1.64-2.59) |
| rs312733   | 68310541 | T/C | 0.23 | 0.32 | 0.0004                 | 0.64 (0.49-0.82) |
| rs312735   | 68311236 | C/T | 0.24 | 0.33 | 0.0006                 | 0.64 (0.50-0.83) |
| rs312736   | 68311680 | T/C | 0.64 | 0.47 | $3.14 \times 10^{-10}$ | 2.04 (1.62-2.56) |
| rs925650   | 68314145 | G/A | 0.10 | 0.17 | 0.0012                 | 0.57 (0.40-0.81) |
| rs17715903 | 68314432 | T/C | 0.02 | 0.03 | 0.1111                 | 0.52 (0.23-1.18) |
| rs312739   | 68315792 | T/C | 0.64 | 0.46 | $3.43 \times 10^{-10}$ | 2.04 (1.62-2.56) |
| rs16975551 | 68316459 | T/C | 0.10 | 0.17 | 0.0012                 | 0.57 (0.40-0.81) |
| rs11653587 | 68316678 | A/G | 0.10 | 0.17 | 0.0011                 | 0.56 (0.40-0.80) |
| rs312740   | 68316925 | G/A | 0.64 | 0.46 | $3.58 \times 10^{-10}$ | 2.04 (1.62-2.56) |
| rs17716015 | 68318051 | A/G | 0.02 | 0.03 | 0.1151                 | 0.52 (0.23-1.19) |
| rs312742   | 68318486 | T/C | 0.24 | 0.33 | 0.0005                 | 0.64 (0.50-0.83) |
| rs312743   | 68318637 | C/T | 0.64 | 0.46 | $3.17 \times 10^{-10}$ | 2.03 (1.62-2.55) |
| rs219937   | 68318758 | T/C | 0.64 | 0.46 | $2.03 \times 10^{-10}$ | 2.05 (1.64-2.57) |
| rs312744   | 68319100 | T/C | 0.24 | 0.33 | 0.0005                 | 0.64 (0.50-0.83) |
| rs4459603  | 68319400 | T/C | 0.10 | 0.17 | 0.0011                 | 0.56 (0.39-0.80) |
| rs72631348 | 68320345 | G/T | 0.10 | 0.17 | 0.0011                 | 0.56 (0.40-0.80) |
| rs312745   | 68321056 | G/A | 0.24 | 0.33 | 0.0005                 | 0.64 (0.50-0.83) |
| rs2671311  | 68321740 | T/C | 0.24 | 0.33 | 0.0006                 | 0.65 (0.50-0.83) |
| rs312686   | 68322130 | C/T | 0.24 | 0.33 | 0.0005                 | 0.64 (0.50-0.83) |
| rs312687   | 68322769 | C/T | 0.24 | 0.33 | 0.0006                 | 0.64 (0.50-0.83) |
| rs17778418 | 68322828 | A/G | 0.12 | 0.20 | 0.0002                 | 0.54 (0.39-0.75) |
| rs79197669 | 68322998 | T/G | 0.02 | 0.03 | 0.1192                 | 0.53 (0.23-1.20) |
| rs16975575 | 68323746 | G/T | 0.64 | 0.46 | $7.70 \times 10^{-11}$ | 2.09 (1.66-2.62) |
| rs312688   | 68324335 | T/C | 0.64 | 0.46 | $1.64 \times 10^{-10}$ | 2.06 (1.64-2.58) |
| rs312689   | 68324795 | G/A | 0.64 | 0.46 | $1.49 \times 10^{-10}$ | 2.06 (1.64-2.59) |
| rs10852724 | 68325744 | C/T | 0.12 | 0.20 | 0.0002                 | 0.54 (0.39-0.75) |

|             |          |     |      |      |                        |                  |
|-------------|----------|-----|------|------|------------------------|------------------|
| rs10775360  | 68325868 | T/C | 0.12 | 0.20 | 0.0002                 | 0.54 (0.39-0.75) |
| rs312691    | 68326338 | C/T | 0.64 | 0.46 | $1.49 \times 10^{-10}$ | 2.06 (1.64-2.59) |
| rs312676    | 68328772 | C/T | 0.24 | 0.33 | 0.0005                 | 0.64 (0.50-0.82) |
| rs312677    | 68329984 | C/T | 0.24 | 0.33 | 0.0005                 | 0.64 (0.50-0.82) |
| rs312678    | 68330936 | C/T | 0.64 | 0.46 | $2.81 \times 10^{-10}$ | 2.04 (1.62-2.56) |
| rs312679    | 68331080 | T/C | 0.24 | 0.33 | 0.0005                 | 0.64 (0.50-0.82) |
| rs312680    | 68331405 | G/A | 0.24 | 0.33 | 0.0005                 | 0.64 (0.50-0.83) |
| rs72631349  | 68332120 | T/C | 0.10 | 0.17 | 0.0013                 | 0.57 (0.40-0.81) |
| rs56130836  | 68335510 | G/A | 0.10 | 0.17 | 0.0013                 | 0.57 (0.40-0.81) |
| rs17763595  | 68335669 | G/A | 0.01 | 0.03 | 0.1605                 | 0.53 (0.22-1.31) |
| rs75210094  | 68337657 | A/G | 0.01 | 0.03 | 0.1605                 | 0.53 (0.22-1.31) |
| rs10512574  | 68337964 | C/T | 0.10 | 0.17 | 0.0011                 | 0.56 (0.40-0.80) |
| rs727402    | 68338097 | G/A | 0.01 | 0.03 | 0.1316                 | 0.51 (0.21-1.25) |
| rs76042964  | 68338119 | T/C | 0.01 | 0.03 | 0.1605                 | 0.53 (0.22-1.31) |
| rs74390260  | 68338132 | A/C | 0.01 | 0.03 | 0.1605                 | 0.53 (0.22-1.31) |
| rs17175927  | 68339334 | C/T | 0.01 | 0.03 | 0.1174                 | 0.50 (0.20-1.22) |
| rs16975596  | 68341545 | G/A | 0.01 | 0.03 | 0.1918                 | 0.55 (0.22-1.37) |
| rs312750    | 68343539 | G/A | 0.22 | 0.31 | 0.0004                 | 0.63 (0.48-0.82) |
| rs11650777  | 68344483 | G/T | 0.38 | 0.51 | $1.32 \times 10^{-5}$  | 0.61 (0.49-0.76) |
| rs11658102  | 68345127 | C/T | 0.61 | 0.48 | $1.80 \times 10^{-6}$  | 1.72 (1.37-2.15) |
| rs312752    | 68346332 | G/A | 0.22 | 0.30 | 0.0008                 | 0.64 (0.49-0.84) |
| rs34819678  | 68346412 | C/A | 0.37 | 0.50 | $6.48 \times 10^{-6}$  | 0.60 (0.47-0.75) |
| rs141912644 | 68346672 | T/C | 0.37 | 0.50 | $6.48 \times 10^{-6}$  | 0.60 (0.47-0.75) |
| rs34432049  | 68346827 | C/T | 0.37 | 0.50 | $6.48 \times 10^{-6}$  | 0.60 (0.47-0.75) |
| rs312756    | 68347453 | T/C | 0.22 | 0.31 | 0.0006                 | 0.64 (0.49-0.83) |
| rs312759    | 68347915 | A/G | 0.22 | 0.31 | 0.0007                 | 0.64 (0.50-0.84) |
| rs11658839  | 68348654 | C/A | 0.37 | 0.50 | $5.31 \times 10^{-6}$  | 0.59 (0.47-0.74) |
| rs3915641   | 68351258 | T/C | 0.22 | 0.31 | 0.0004                 | 0.63 (0.48-0.82) |
| rs9911531   | 68351574 | A/G | 0.37 | 0.50 | $5.70 \times 10^{-6}$  | 0.59 (0.47-0.75) |
| rs16975652  | 68353088 | G/T | 0.15 | 0.19 | 0.0625                 | 0.75 (0.55-1.02) |
| rs312774    | 68353267 | C/T | 0.15 | 0.19 | 0.0625                 | 0.75 (0.55-1.02) |
| rs16975656  | 68353308 | C/A | 0.15 | 0.19 | 0.0631                 | 0.75 (0.55-1.02) |
| rs141155    | 68353592 | C/A | 0.22 | 0.31 | 0.0008                 | 0.64 (0.50-0.84) |
| rs7216514   | 68353830 | T/C | 0.37 | 0.50 | $5.79 \times 10^{-6}$  | 0.59 (0.47-0.75) |
| rs118013304 | 68354716 | G/A | 0.15 | 0.19 | 0.0632                 | 0.75 (0.55-1.02) |
| rs9915405   | 68355681 | G/A | 0.02 | 0.03 | 0.4471                 | 0.74 (0.34-1.60) |
| rs3930668   | 68356715 | A/G | 0.15 | 0.19 | 0.1028                 | 0.78 (0.57-1.06) |
| rs117005762 | 68358199 | A/G | 0.61 | 0.48 | $2.50 \times 10^{-6}$  | 1.70 (1.36-2.12) |
| rs8067429   | 68358543 | C/A | 0.02 | 0.03 | 0.4602                 | 0.75 (0.35-1.62) |
| rs3848450   | 68358571 | A/C | 0.22 | 0.30 | 0.0008                 | 0.64 (0.50-0.84) |
| rs56234797  | 68359332 | A/G | 0.02 | 0.03 | 0.4471                 | 0.74 (0.34-1.60) |
| rs3848451   | 68359507 | C/A | 0.17 | 0.22 | 0.0471                 | 0.75 (0.56-1.00) |
| rs9911312   | 68360298 | T/C | 0.02 | 0.03 | 0.4464                 | 0.74 (0.34-1.60) |
| rs12453350  | 68360361 | T/G | 0.15 | 0.19 | 0.0945                 | 0.77 (0.57-1.05) |
| rs3848452   | 68361325 | C/A | 0.15 | 0.19 | 0.0729                 | 0.76 (0.56-1.03) |
| rs34387866  | 68361649 | T/C | 0.60 | 0.48 | $5.32 \times 10^{-6}$  | 1.67 (1.34-2.09) |
| rs3848453   | 68362094 | C/T | 0.24 | 0.33 | 0.0003                 | 0.63 (0.49-0.82) |
| rs3891526   | 68362228 | G/A | 0.02 | 0.03 | 0.4464                 | 0.74 (0.34-1.60) |
| rs17777464  | 68363962 | G/A | 0.02 | 0.03 | 0.4464                 | 0.74 (0.34-1.60) |
| rs34397323  | 68364642 | T/C | 0.60 | 0.48 | $5.03 \times 10^{-6}$  | 1.67 (1.34-2.09) |
| rs4108132   | 68365103 | A/G | 0.17 | 0.22 | 0.0332                 | 0.73 (0.55-0.98) |
| rs3848454   | 68365456 | G/A | 0.02 | 0.03 | 0.4464                 | 0.74 (0.34-1.60) |

|             |          |     |      |      |                       |                  |
|-------------|----------|-----|------|------|-----------------------|------------------|
| rs62070139  | 68366487 | A/G | 0.22 | 0.30 | 0.0011                | 0.65 (0.50-0.85) |
| rs16975680  | 68368974 | C/T | 0.02 | 0.03 | 0.4336                | 0.74 (0.34-1.59) |
| rs55728576  | 68371110 | A/G | 0.02 | 0.03 | 0.4464                | 0.74 (0.34-1.60) |
| rs78702439  | 68373950 | A/G | 0.02 | 0.03 | 0.4456                | 0.74 (0.34-1.60) |
| rs4485410   | 68375946 | C/T | 0.61 | 0.47 | $8.26 \times 10^{-7}$ | 1.75 (1.40-2.19) |
| rs12451295  | 68376823 | C/T | 0.63 | 0.50 | $3.36 \times 10^{-6}$ | 1.70 (1.36-2.13) |
| rs112573029 | 68378114 | A/G | 0.02 | 0.03 | 0.4456                | 0.74 (0.34-1.60) |
| rs16975694  | 68380657 | T/C | 0.78 | 0.70 | 0.0012                | 1.53 (1.18-1.99) |
| rs72631351  | 68380886 | C/A | 0.15 | 0.18 | 0.1109                | 0.78 (0.57-1.06) |
| rs1972558   | 68381113 | G/A | 0.61 | 0.48 | $2.32 \times 10^{-6}$ | 1.70 (1.36-2.13) |
| rs6501388   | 68381555 | G/A | 0.37 | 0.50 | $5.65 \times 10^{-6}$ | 0.60 (0.47-0.75) |
| rs12451506  | 68382303 | A/G | 0.13 | 0.18 | 0.0437                | 0.72 (0.52-0.99) |
| rs112365958 | 68385169 | T/C | 0.02 | 0.02 | 0.4290                | 0.71 (0.31-1.64) |
| rs12601221  | 68408395 | T/C | 0.24 | 0.33 | 0.0006                | 0.64 (0.50-0.83) |
| rs9891615   | 68410240 | G/A | 0.10 | 0.12 | 0.2877                | 0.83 (0.58-1.18) |
| rs17778406  | 68415535 | A/G | 0.10 | 0.11 | 0.5283                | 0.89 (0.62-1.28) |
| rs11077494  | 68416552 | G/T | 0.23 | 0.31 | 0.0014                | 0.66 (0.51-0.86) |
| rs16975758  | 68419330 | G/A | 0.33 | 0.43 | 0.0003                | 0.65 (0.52-0.82) |
| rs1396513   | 68420598 | C/T | 0.23 | 0.31 | 0.0008                | 0.65 (0.50-0.84) |
| rs7217259   | 68421684 | G/A | 0.33 | 0.43 | 0.0005                | 0.66 (0.53-0.84) |
| rs1396517   | 68421803 | T/C | 0.23 | 0.31 | 0.0008                | 0.65 (0.50-0.84) |
| rs9916380   | 68422273 | A/G | 0.23 | 0.31 | 0.0008                | 0.65 (0.50-0.84) |
| rs17778568  | 68423470 | C/T | 0.10 | 0.12 | 0.4797                | 0.88 (0.61-1.26) |
| rs766752    | 68424292 | G/A | 0.23 | 0.31 | 0.0008                | 0.65 (0.50-0.84) |
| rs62071763  | 68424806 | A/G | 0.33 | 0.43 | 0.0005                | 0.66 (0.53-0.84) |
| rs9898685   | 68428858 | A/G | 0.10 | 0.12 | 0.4038                | 0.86 (0.60-1.23) |
| rs2366790   | 68430939 | T/G | 0.33 | 0.43 | 0.0004                | 0.66 (0.53-0.84) |
| rs1396514   | 68431026 | C/T | 0.23 | 0.31 | 0.0008                | 0.65 (0.50-0.84) |
| rs9897538   | 68432122 | A/C | 0.23 | 0.31 | 0.0008                | 0.65 (0.50-0.84) |
| rs16975792  | 68433725 | G/A | 0.67 | 0.57 | 0.0004                | 1.51 (1.20-1.91) |
| rs6501392   | 68434200 | A/G | 0.23 | 0.31 | 0.0008                | 0.65 (0.50-0.84) |
| rs16975800  | 68436385 | G/A | 0.33 | 0.43 | 0.0003                | 0.66 (0.52-0.83) |
| rs2159437   | 68439660 | A/G | 0.22 | 0.31 | 0.0004                | 0.63 (0.48-0.82) |
| rs62071764  | 68439864 | G/A | 0.33 | 0.43 | 0.0004                | 0.66 (0.52-0.83) |
| rs1120297   | 68441938 | C/T | 0.23 | 0.31 | 0.0008                | 0.65 (0.50-0.84) |
| rs10491172  | 68447186 | T/G | 0.10 | 0.11 | 0.4423                | 0.87 (0.60-1.25) |
| rs9890686   | 68447566 | T/C | 0.10 | 0.11 | 0.4423                | 0.87 (0.60-1.25) |
| rs76647912  | 68448669 | T/C | 0.10 | 0.11 | 0.4423                | 0.87 (0.60-1.25) |
| rs11658767  | 68451507 | C/T | 0.10 | 0.12 | 0.4157                | 0.86 (0.60-1.23) |
| rs12941598  | 68453327 | A/G | 0.10 | 0.12 | 0.4865                | 0.88 (0.62-1.26) |
| rs71375785  | 68453496 | T/C | 0.10 | 0.12 | 0.4161                | 0.86 (0.60-1.24) |
| rs4603601   | 68470335 | G/A | 0.23 | 0.31 | 0.0027                | 0.68 (0.52-0.88) |
| rs1605750   | 68471073 | A/G | 0.77 | 0.69 | 0.0022                | 1.49 (1.15-1.93) |
| rs981106    | 68472639 | A/G | 0.24 | 0.32 | 0.0020                | 0.67 (0.52-0.87) |
| rs9913332   | 68473804 | G/A | 0.24 | 0.31 | 0.0024                | 0.68 (0.53-0.88) |
| rs9899840   | 68473933 | T/C | 0.24 | 0.31 | 0.0022                | 0.68 (0.52-0.88) |
| rs12103465  | 68474616 | G/T | 0.24 | 0.31 | 0.0024                | 0.68 (0.53-0.88) |
| rs12103757  | 68474833 | A/G | 0.24 | 0.31 | 0.0024                | 0.68 (0.53-0.88) |
| rs1605749   | 68475145 | A/G | 0.24 | 0.31 | 0.0024                | 0.68 (0.53-0.88) |
| rs4399570   | 68479345 | A/G | 0.10 | 0.12 | 0.3963                | 0.86 (0.60-1.22) |
| rs11658719  | 68481508 | T/G | 0.31 | 0.40 | 0.0020                | 0.69 (0.55-0.88) |
| rs60237700  | 68481901 | G/A | 0.31 | 0.40 | 0.0020                | 0.69 (0.55-0.88) |

|            |          |     |      |      |        |                  |
|------------|----------|-----|------|------|--------|------------------|
| rs16975820 | 68482625 | A/G | 0.31 | 0.40 | 0.0020 | 0.69 (0.55-0.88) |
| rs1013506  | 68483505 | T/G | 0.31 | 0.40 | 0.0019 | 0.69 (0.55-0.88) |
| rs7213968  | 68483944 | C/T | 0.25 | 0.32 | 0.0065 | 0.71 (0.55-0.91) |
| rs16975824 | 68484050 | G/A | 0.31 | 0.40 | 0.0020 | 0.69 (0.55-0.88) |
| rs59075614 | 68484199 | C/T | 0.31 | 0.40 | 0.0018 | 0.69 (0.55-0.88) |
| rs16975825 | 68484861 | T/C | 0.31 | 0.40 | 0.0016 | 0.69 (0.54-0.87) |
| rs16975827 | 68484911 | T/C | 0.31 | 0.40 | 0.0018 | 0.69 (0.55-0.88) |
| rs16975828 | 68485195 | T/C | 0.31 | 0.40 | 0.0020 | 0.69 (0.55-0.88) |
| rs57066942 | 68485521 | C/A | 0.31 | 0.40 | 0.0018 | 0.69 (0.55-0.88) |
| rs9302917  | 68485688 | G/A | 0.25 | 0.32 | 0.0062 | 0.71 (0.55-0.91) |
| rs57618720 | 68486241 | G/A | 0.31 | 0.40 | 0.0018 | 0.69 (0.55-0.88) |
| rs72631353 | 68486295 | T/C | 0.31 | 0.40 | 0.0018 | 0.69 (0.55-0.88) |
| rs61363360 | 68486334 | G/A | 0.31 | 0.40 | 0.0018 | 0.69 (0.55-0.88) |
| rs9896425  | 68486927 | G/A | 0.25 | 0.32 | 0.0075 | 0.71 (0.56-0.92) |
| rs12051831 | 68487515 | T/C | 0.31 | 0.40 | 0.0018 | 0.69 (0.55-0.88) |
| rs4793375  | 68488063 | A/G | 0.31 | 0.40 | 0.0018 | 0.69 (0.55-0.88) |
| rs4793266  | 68488089 | G/A | 0.31 | 0.40 | 0.0018 | 0.69 (0.55-0.88) |
| rs72631354 | 68488588 | G/A | 0.31 | 0.40 | 0.0018 | 0.69 (0.55-0.88) |
| rs59385779 | 68488603 | T/C | 0.31 | 0.40 | 0.0018 | 0.69 (0.55-0.88) |
| rs59310654 | 68488708 | A/G | 0.31 | 0.40 | 0.0018 | 0.69 (0.55-0.88) |
| rs60324625 | 68488765 | G/A | 0.31 | 0.40 | 0.0018 | 0.69 (0.55-0.88) |
| rs59556916 | 68488778 | A/G | 0.31 | 0.40 | 0.0018 | 0.69 (0.55-0.88) |
| rs12450317 | 68489384 | A/G | 0.31 | 0.40 | 0.0018 | 0.69 (0.55-0.88) |
| rs11652006 | 68489725 | A/G | 0.31 | 0.40 | 0.0018 | 0.69 (0.55-0.88) |
| rs72631356 | 68490514 | C/T | 0.31 | 0.40 | 0.0018 | 0.69 (0.55-0.88) |
| rs8080138  | 68490662 | T/C | 0.31 | 0.40 | 0.0019 | 0.69 (0.55-0.88) |
| rs8080507  | 68491130 | A/G | 0.31 | 0.40 | 0.0018 | 0.69 (0.55-0.88) |
| rs8066148  | 68491223 | T/C | 0.31 | 0.40 | 0.0018 | 0.69 (0.55-0.88) |
| rs62069780 | 68491289 | G/A | 0.31 | 0.40 | 0.0018 | 0.69 (0.55-0.88) |
| rs62069781 | 68491329 | T/C | 0.31 | 0.40 | 0.0018 | 0.69 (0.55-0.88) |
| rs72631358 | 68491516 | C/A | 0.31 | 0.40 | 0.0018 | 0.69 (0.55-0.88) |
| rs72631359 | 68491765 | C/T | 0.31 | 0.40 | 0.0018 | 0.69 (0.55-0.88) |
| rs62069782 | 68491982 | A/G | 0.31 | 0.40 | 0.0019 | 0.69 (0.55-0.88) |
| rs9897071  | 68492083 | A/G | 0.25 | 0.32 | 0.0074 | 0.71 (0.56-0.92) |
| rs62069783 | 68492256 | C/T | 0.69 | 0.60 | 0.0016 | 1.45 (1.15-1.84) |
| rs62069784 | 68492272 | A/G | 0.31 | 0.40 | 0.0018 | 0.69 (0.55-0.88) |
| rs62069785 | 68492352 | A/G | 0.31 | 0.40 | 0.0018 | 0.69 (0.55-0.88) |
| rs8072275  | 68492918 | A/G | 0.25 | 0.32 | 0.0064 | 0.71 (0.55-0.91) |
| rs10512539 | 68494308 | T/C | 0.31 | 0.40 | 0.0018 | 0.69 (0.55-0.88) |
| rs17779747 | 68494992 | T/G | 0.06 | 0.07 | 0.3503 | 0.80 (0.51-1.27) |
| rs62069786 | 68495335 | T/C | 0.31 | 0.40 | 0.0018 | 0.69 (0.55-0.88) |
| rs9899335  | 68495920 | C/A | 0.25 | 0.32 | 0.0063 | 0.71 (0.55-0.91) |
| rs16975850 | 68496503 | C/T | 0.31 | 0.40 | 0.0018 | 0.69 (0.55-0.88) |
| rs34249873 | 68496999 | C/T | 0.31 | 0.40 | 0.0018 | 0.69 (0.55-0.88) |
| rs72631360 | 68497005 | C/T | 0.31 | 0.40 | 0.0024 | 0.70 (0.55-0.88) |
| rs12451006 | 68497656 | A/G | 0.31 | 0.40 | 0.0018 | 0.69 (0.55-0.88) |
| rs980248   | 68498025 | A/G | 0.31 | 0.40 | 0.0019 | 0.69 (0.55-0.88) |
| rs12453924 | 68499065 | T/G | 0.31 | 0.40 | 0.0017 | 0.69 (0.55-0.87) |
| rs7210840  | 68500929 | A/G | 0.31 | 0.40 | 0.0017 | 0.69 (0.55-0.87) |
| rs11655221 | 68504007 | A/G | 0.31 | 0.40 | 0.0017 | 0.69 (0.55-0.87) |
| rs1860452  | 68505159 | T/C | 0.06 | 0.08 | 0.3254 | 0.79 (0.50-1.25) |
| rs6501398  | 68506237 | G/A | 0.31 | 0.40 | 0.0017 | 0.69 (0.55-0.87) |



|            |          |     |      |      |        |                  |
|------------|----------|-----|------|------|--------|------------------|
| rs7218368  | 68506682 | A/G | 0.06 | 0.08 | 0.3183 | 0.79 (0.50-1.25) |
| rs1594477  | 68507436 | T/C | 0.25 | 0.32 | 0.0072 | 0.71 (0.56-0.92) |
| rs173269   | 68508992 | A/G | 0.25 | 0.32 | 0.0072 | 0.71 (0.56-0.92) |
| rs7216543  | 68509129 | G/T | 0.31 | 0.40 | 0.0016 | 0.69 (0.54-0.87) |
| rs1594476  | 68509474 | G/A | 0.31 | 0.40 | 0.0016 | 0.69 (0.54-0.87) |
| rs1594475  | 68509649 | C/T | 0.32 | 0.40 | 0.0025 | 0.70 (0.55-0.89) |
| rs4793394  | 68509868 | G/A | 0.25 | 0.32 | 0.0054 | 0.70 (0.55-0.91) |
| rs4793395  | 68509948 | T/C | 0.25 | 0.32 | 0.0054 | 0.70 (0.55-0.91) |
| rs9894256  | 68511145 | G/A | 0.25 | 0.32 | 0.0055 | 0.70 (0.55-0.91) |
| rs11077499 | 68511177 | G/A | 0.31 | 0.40 | 0.0016 | 0.69 (0.55-0.87) |
| rs8070940  | 68512290 | G/A | 0.31 | 0.40 | 0.0014 | 0.68 (0.54-0.87) |
| rs62069815 | 68512665 | T/C | 0.31 | 0.40 | 0.0018 | 0.69 (0.55-0.88) |
| rs12103678 | 68513822 | G/A | 0.06 | 0.08 | 0.2535 | 0.76 (0.48-1.21) |
| rs8073016  | 68516092 | G/T | 0.32 | 0.39 | 0.0065 | 0.72 (0.57-0.92) |
| rs11650835 | 68532795 | T/C | 0.06 | 0.09 | 0.0381 | 0.62 (0.39-0.98) |
| rs350604   | 68532894 | T/G | 0.18 | 0.19 | 0.5537 | 0.92 (0.69-1.22) |
| rs11657696 | 68532901 | C/T | 0.06 | 0.09 | 0.0381 | 0.62 (0.39-0.98) |
| rs11651554 | 68533019 | A/G | 0.06 | 0.09 | 0.0555 | 0.65 (0.41-1.02) |
| rs350603   | 68533650 | T/G | 0.24 | 0.28 | 0.0800 | 0.80 (0.62-1.03) |
| rs72855908 | 68533703 | T/C | 0.06 | 0.09 | 0.0639 | 0.65 (0.41-1.03) |
| rs11653245 | 68534127 | T/C | 0.06 | 0.09 | 0.0375 | 0.62 (0.39-0.98) |
| rs11653355 | 68534353 | T/C | 0.06 | 0.09 | 0.0384 | 0.62 (0.39-0.98) |
| rs11655558 | 68535985 | A/G | 0.05 | 0.08 | 0.0700 | 0.64 (0.39-1.04) |
| rs11655611 | 68536105 | A/G | 0.05 | 0.08 | 0.0700 | 0.64 (0.39-1.04) |
| rs1825672  | 68536144 | A/G | 0.05 | 0.08 | 0.0700 | 0.64 (0.39-1.04) |
| rs7220610  | 68536855 | C/T | 0.05 | 0.08 | 0.0706 | 0.64 (0.39-1.04) |
| rs16913    | 68537347 | T/C | 0.06 | 0.08 | 0.0972 | 0.67 (0.42-1.08) |
| rs72855914 | 68538107 | T/C | 0.06 | 0.08 | 0.0972 | 0.67 (0.42-1.08) |
| rs420762   | 68538121 | A/G | 0.23 | 0.27 | 0.1490 | 0.83 (0.64-1.07) |
| rs72855918 | 68538413 | A/G | 0.06 | 0.08 | 0.0972 | 0.67 (0.42-1.08) |
| rs2630640  | 68538485 | A/C | 0.23 | 0.27 | 0.1595 | 0.83 (0.64-1.08) |
| rs34793380 | 68538857 | T/C | 0.06 | 0.08 | 0.0972 | 0.67 (0.42-1.08) |
| rs1817630  | 68539112 | A/G | 0.06 | 0.08 | 0.1147 | 0.68 (0.43-1.10) |
| rs7218450  | 68539320 | C/A | 0.06 | 0.08 | 0.0972 | 0.67 (0.42-1.08) |
| rs16975882 | 68540264 | C/T | 0.06 | 0.08 | 0.1363 | 0.70 (0.44-1.12) |
| rs72855927 | 68540281 | G/T | 0.06 | 0.08 | 0.1363 | 0.70 (0.44-1.12) |
| rs10512540 | 68540752 | T/C | 0.06 | 0.08 | 0.1400 | 0.71 (0.44-1.13) |
| rs72855936 | 68547220 | A/G | 0.06 | 0.08 | 0.1363 | 0.70 (0.44-1.12) |
| rs8080393  | 68548577 | C/T | 0.06 | 0.08 | 0.1363 | 0.70 (0.44-1.12) |
| rs8075249  | 68548806 | A/G | 0.06 | 0.08 | 0.1363 | 0.70 (0.44-1.12) |
| rs8080759  | 68548808 | G/T | 0.06 | 0.08 | 0.1363 | 0.70 (0.44-1.12) |
| rs350607   | 68549573 | G/A | 0.17 | 0.19 | 0.6042 | 0.93 (0.69-1.24) |
| rs8081864  | 68549692 | G/A | 0.06 | 0.08 | 0.1363 | 0.70 (0.44-1.12) |
| rs8066762  | 68549840 | A/C | 0.06 | 0.08 | 0.1363 | 0.70 (0.44-1.12) |
| rs55936715 | 68550541 | T/C | 0.06 | 0.08 | 0.1363 | 0.70 (0.44-1.12) |
| rs4793451  | 68553696 | T/C | 0.23 | 0.27 | 0.1754 | 0.84 (0.65-1.08) |
| rs350613   | 68554203 | G/A | 0.29 | 0.32 | 0.2198 | 0.86 (0.67-1.10) |
| rs350614   | 68554841 | G/A | 0.18 | 0.19 | 0.6286 | 0.93 (0.70-1.24) |
| rs350615   | 68555708 | G/A | 0.29 | 0.32 | 0.2119 | 0.86 (0.67-1.09) |
| rs350616   | 68556104 | A/G | 0.23 | 0.27 | 0.1695 | 0.84 (0.65-1.08) |
| rs73391629 | 68557427 | T/G | 0.06 | 0.08 | 0.1269 | 0.70 (0.44-1.11) |
| rs8081551  | 68558285 | T/C | 0.05 | 0.05 | 0.7741 | 1.08 (0.66-1.77) |

|            |          |     |      |      |        |                  |
|------------|----------|-----|------|------|--------|------------------|
| rs8073324  | 68560126 | T/C | 0.05 | 0.05 | 0.7741 | 1.08 (0.66-1.77) |
| rs1431455  | 68560681 | A/G | 0.06 | 0.08 | 0.1329 | 0.70 (0.44-1.12) |
| rs350618   | 68561417 | T/C | 0.18 | 0.19 | 0.6210 | 0.93 (0.70-1.24) |
| rs1991679  | 68561705 | T/C | 0.05 | 0.05 | 0.7741 | 1.08 (0.66-1.77) |
| rs73998863 | 68562393 | A/G | 0.05 | 0.05 | 0.7741 | 1.08 (0.66-1.77) |
| rs11655478 | 68562405 | G/A | 0.06 | 0.08 | 0.1394 | 0.71 (0.44-1.12) |
| rs7224554  | 68564543 | C/T | 0.06 | 0.08 | 0.1388 | 0.71 (0.44-1.12) |
| rs79369382 | 68564988 | G/A | 0.05 | 0.05 | 0.7501 | 1.09 (0.66-1.78) |
| rs7210525  | 68565508 | C/T | 0.05 | 0.05 | 0.7338 | 1.09 (0.67-1.79) |
| rs350620   | 68566532 | A/G | 0.16 | 0.18 | 0.5209 | 0.91 (0.68-1.22) |
| rs66975013 | 68566959 | G/A | 0.06 | 0.08 | 0.1017 | 0.67 (0.42-1.08) |
| rs75721533 | 68567449 | T/C | 0.05 | 0.05 | 0.7352 | 1.09 (0.67-1.79) |
| rs350623   | 68568374 | G/A | 0.18 | 0.19 | 0.6210 | 0.93 (0.70-1.24) |
| rs350625   | 68569775 | C/A | 0.18 | 0.19 | 0.6115 | 0.93 (0.70-1.24) |
| rs350626   | 68570105 | C/T | 0.18 | 0.19 | 0.6096 | 0.93 (0.70-1.24) |
| rs67365307 | 68571407 | A/G | 0.05 | 0.08 | 0.0638 | 0.63 (0.38-1.03) |
| rs61339122 | 68571916 | G/A | 0.06 | 0.08 | 0.0997 | 0.67 (0.42-1.08) |
| rs66695132 | 68572695 | A/G | 0.06 | 0.08 | 0.0997 | 0.67 (0.42-1.08) |
| rs78135447 | 68574241 | C/T | 0.08 | 0.07 | 0.2335 | 1.28 (0.85-1.92) |
| rs718950   | 68576399 | T/C | 0.06 | 0.08 | 0.1638 | 0.72 (0.45-1.15) |
| rs74964366 | 68576732 | T/G | 0.08 | 0.06 | 0.2237 | 1.29 (0.86-1.93) |
| rs72855756 | 68577077 | T/C | 0.06 | 0.08 | 0.1432 | 0.71 (0.44-1.13) |
| rs72855757 | 68577079 | A/C | 0.06 | 0.08 | 0.1432 | 0.71 (0.44-1.13) |
| rs1431454  | 68578940 | T/C | 0.21 | 0.26 | 0.0481 | 0.76 (0.59-1.00) |
| rs9302918  | 68580317 | A/G | 0.15 | 0.18 | 0.2248 | 0.83 (0.61-1.12) |
| rs9302919  | 68580485 | G/T | 0.21 | 0.26 | 0.0500 | 0.77 (0.59-1.00) |
| rs67720976 | 68580589 | A/G | 0.06 | 0.08 | 0.1375 | 0.70 (0.44-1.12) |
| rs66940395 | 68580926 | G/A | 0.06 | 0.08 | 0.1375 | 0.70 (0.44-1.12) |
| rs11652089 | 68581309 | T/G | 0.06 | 0.08 | 0.1375 | 0.70 (0.44-1.12) |
| rs12938026 | 68582006 | C/T | 0.15 | 0.18 | 0.2429 | 0.84 (0.62-1.13) |
| rs7220885  | 68582827 | A/G | 0.15 | 0.18 | 0.2429 | 0.84 (0.62-1.13) |
| rs16975944 | 68585573 | T/G | 0.06 | 0.08 | 0.1334 | 0.70 (0.44-1.12) |
| rs9915992  | 68586165 | T/C | 0.15 | 0.18 | 0.2414 | 0.84 (0.62-1.13) |
| rs9902449  | 68587002 | C/T | 0.07 | 0.11 | 0.0098 | 0.57 (0.37-0.88) |
| rs17779190 | 68588005 | T/G | 0.05 | 0.08 | 0.0653 | 0.64 (0.39-1.04) |
| rs11650015 | 68588221 | G/A | 0.06 | 0.08 | 0.1369 | 0.70 (0.44-1.12) |
| rs2109051  | 68588806 | A/C | 0.93 | 0.89 | 0.0107 | 1.74 (1.13-2.69) |
| rs76935250 | 68588900 | G/A | 0.08 | 0.07 | 0.2497 | 1.27 (0.85-1.90) |
| rs66985256 | 68589254 | A/C | 0.05 | 0.08 | 0.0653 | 0.64 (0.39-1.04) |
| rs9905624  | 68590070 | T/C | 0.07 | 0.11 | 0.0096 | 0.57 (0.37-0.88) |
| rs12949221 | 68590626 | C/T | 0.07 | 0.11 | 0.0093 | 0.57 (0.37-0.88) |
| rs1911969  | 68590720 | C/T | 0.27 | 0.32 | 0.1053 | 0.82 (0.64-1.04) |
| rs11658215 | 68590996 | A/G | 0.07 | 0.11 | 0.0216 | 0.62 (0.41-0.94) |
| rs9914225  | 68591432 | T/C | 0.15 | 0.18 | 0.2362 | 0.83 (0.62-1.13) |
| rs9894021  | 68591641 | C/T | 0.07 | 0.11 | 0.0227 | 0.62 (0.41-0.94) |
| rs9891523  | 68591900 | A/G | 0.07 | 0.11 | 0.0452 | 0.65 (0.43-0.99) |
| rs55776997 | 68592069 | G/A | 0.08 | 0.06 | 0.2327 | 1.28 (0.85-1.92) |
| rs720876   | 68592328 | G/A | 0.15 | 0.18 | 0.2377 | 0.83 (0.62-1.13) |
| rs56122571 | 68593494 | G/A | 0.08 | 0.07 | 0.2604 | 1.26 (0.84-1.89) |
| rs7218838  | 68594820 | A/G | 0.27 | 0.32 | 0.1072 | 0.82 (0.64-1.05) |
| rs7209535  | 68595027 | C/T | 0.15 | 0.18 | 0.2377 | 0.83 (0.62-1.13) |
| rs9896809  | 68595316 | C/T | 0.07 | 0.11 | 0.0235 | 0.62 (0.41-0.94) |

|             |          |     |      |      |        |                  |
|-------------|----------|-----|------|------|--------|------------------|
| rs111881537 | 68595444 | T/C | 0.06 | 0.08 | 0.1288 | 0.70 (0.44-1.11) |
| rs8073162   | 68596950 | G/A | 0.21 | 0.26 | 0.0506 | 0.77 (0.59-1.00) |
| rs8073114   | 68597310 | T/C | 0.21 | 0.26 | 0.0506 | 0.77 (0.59-1.00) |
| rs8072003   | 68597329 | A/G | 0.06 | 0.08 | 0.1426 | 0.71 (0.45-1.13) |
| rs113756630 | 68597642 | A/G | 0.06 | 0.08 | 0.1426 | 0.71 (0.45-1.13) |
| rs11656223  | 68597862 | G/A | 0.06 | 0.08 | 0.1426 | 0.71 (0.45-1.13) |
| rs6501400   | 68598714 | A/G | 0.08 | 0.07 | 0.2829 | 1.25 (0.83-1.87) |
| rs8074266   | 68598912 | G/A | 0.08 | 0.07 | 0.2829 | 1.25 (0.83-1.87) |
| rs12601471  | 68599543 | A/G | 0.08 | 0.07 | 0.2528 | 1.27 (0.84-1.90) |
| rs12603574  | 68599740 | G/A | 0.08 | 0.07 | 0.2528 | 1.27 (0.84-1.90) |
| rs11077507  | 68599873 | A/G | 0.20 | 0.20 | 0.9729 | 1.00 (0.76-1.31) |
| rs11077508  | 68599950 | A/G | 0.14 | 0.15 | 0.7201 | 0.94 (0.69-1.29) |
| rs74628097  | 68599971 | A/G | 0.08 | 0.07 | 0.2528 | 1.27 (0.84-1.90) |
| rs7224183   | 68600610 | C/A | 0.21 | 0.26 | 0.0512 | 0.77 (0.59-1.00) |
| rs66937233  | 68600927 | C/T | 0.05 | 0.08 | 0.0679 | 0.64 (0.39-1.04) |
| rs79392721  | 68601245 | A/G | 0.08 | 0.07 | 0.2604 | 1.26 (0.84-1.89) |
| rs12449913  | 68601428 | G/A | 0.14 | 0.15 | 0.7176 | 0.94 (0.69-1.29) |
| rs76700882  | 68601434 | G/A | 0.08 | 0.07 | 0.2604 | 1.26 (0.84-1.89) |
| rs7220084   | 68603263 | T/C | 0.21 | 0.26 | 0.0506 | 0.77 (0.59-1.00) |
| rs7224857   | 68603331 | C/T | 0.21 | 0.26 | 0.0506 | 0.77 (0.59-1.00) |
| rs7221545   | 68603776 | C/A | 0.21 | 0.25 | 0.0464 | 0.76 (0.58-1.00) |
| rs1979538   | 68604240 | G/A | 0.21 | 0.26 | 0.0520 | 0.77 (0.59-1.00) |
| rs75508227  | 68604404 | A/G | 0.08 | 0.07 | 0.2528 | 1.27 (0.84-1.90) |
| rs67286965  | 68604814 | G/A | 0.06 | 0.08 | 0.1414 | 0.71 (0.44-1.13) |
| rs12949351  | 68605285 | G/A | 0.07 | 0.11 | 0.0243 | 0.62 (0.41-0.95) |
| rs78123369  | 68605963 | G/T | 0.08 | 0.07 | 0.2528 | 1.27 (0.84-1.90) |
| rs9913650   | 68606308 | C/T | 0.07 | 0.11 | 0.0204 | 0.61 (0.40-0.93) |
| rs1860316   | 68606316 | A/G | 0.28 | 0.32 | 0.1109 | 0.82 (0.64-1.05) |
| rs9914115   | 68606491 | C/T | 0.15 | 0.18 | 0.2234 | 0.83 (0.61-1.12) |
| rs9908443   | 68606605 | C/A | 0.07 | 0.11 | 0.0202 | 0.61 (0.40-0.93) |
| rs8079029   | 68606890 | G/A | 0.28 | 0.32 | 0.1142 | 0.82 (0.64-1.05) |
| rs9895773   | 68608047 | A/G | 0.14 | 0.15 | 0.8000 | 0.96 (0.70-1.31) |
| rs41459950  | 68609232 | C/T | 0.06 | 0.06 | 0.6685 | 1.10 (0.70-1.73) |
| rs12940023  | 68610278 | C/T | 0.07 | 0.11 | 0.0226 | 0.62 (0.41-0.94) |
| rs4019476   | 68610482 | A/G | 0.28 | 0.32 | 0.1305 | 0.83 (0.65-1.06) |
| rs78028239  | 68610605 | G/A | 0.08 | 0.07 | 0.2574 | 1.26 (0.84-1.89) |
| rs7211934   | 68610913 | C/T | 0.21 | 0.26 | 0.0625 | 0.78 (0.60-1.01) |
| rs4793496   | 68611747 | C/T | 0.15 | 0.18 | 0.2425 | 0.84 (0.62-1.13) |
| rs41528454  | 68612087 | T/C | 0.06 | 0.06 | 0.6173 | 1.12 (0.72-1.76) |
| rs41381246  | 68612119 | G/A | 0.14 | 0.15 | 0.8000 | 0.96 (0.70-1.31) |
| rs9908077   | 68613494 | A/G | 0.14 | 0.15 | 0.8000 | 0.96 (0.70-1.31) |
| rs7209850   | 68614398 | C/T | 0.21 | 0.26 | 0.0632 | 0.78 (0.60-1.02) |
| rs2035581   | 68615171 | G/A | 0.06 | 0.08 | 0.1751 | 0.73 (0.46-1.15) |
| rs16975961  | 68615246 | G/A | 0.14 | 0.15 | 0.7937 | 0.96 (0.70-1.31) |
| rs9904090   | 68616596 | T/G | 0.14 | 0.15 | 0.7875 | 0.96 (0.70-1.31) |
| rs16975968  | 68616709 | A/G | 0.06 | 0.08 | 0.1721 | 0.73 (0.46-1.15) |
| rs56096308  | 68616910 | T/C | 0.08 | 0.07 | 0.2594 | 1.26 (0.84-1.89) |
| rs9911708   | 68617532 | A/G | 0.14 | 0.15 | 0.7771 | 0.96 (0.70-1.31) |
| rs9907685   | 68618615 | T/C | 0.08 | 0.07 | 0.3126 | 1.23 (0.82-1.85) |
| rs16975970  | 68620316 | A/G | 0.06 | 0.06 | 0.5786 | 1.14 (0.72-1.78) |
| rs1981646   | 68620400 | C/T | 0.22 | 0.26 | 0.0693 | 0.78 (0.60-1.02) |
| rs11656723  | 68620561 | C/T | 0.06 | 0.08 | 0.1758 | 0.73 (0.46-1.15) |

|            |          |     |      |      |        |                  |
|------------|----------|-----|------|------|--------|------------------|
| rs1981647  | 68621193 | C/T | 0.21 | 0.24 | 0.1140 | 0.81 (0.61-1.06) |
| rs16975979 | 68621437 | G/T | 0.06 | 0.08 | 0.1726 | 0.73 (0.46-1.15) |
| rs9909661  | 68622636 | A/G | 0.15 | 0.18 | 0.2450 | 0.84 (0.62-1.13) |
| rs9890554  | 68623236 | T/C | 0.22 | 0.26 | 0.0654 | 0.78 (0.60-1.02) |
| rs72861479 | 68629947 | A/C | 0.06 | 0.08 | 0.0967 | 0.67 (0.42-1.08) |
| rs55792555 | 68633143 | A/G | 0.06 | 0.08 | 0.2499 | 0.77 (0.49-1.20) |
| rs16975985 | 68634065 | G/A | 0.06 | 0.08 | 0.1906 | 0.74 (0.47-1.17) |
| rs2109053  | 68635359 | T/C | 0.06 | 0.08 | 0.0785 | 0.66 (0.41-1.06) |
| rs79616191 | 68635756 | C/A | 0.05 | 0.05 | 0.9530 | 1.02 (0.63-1.64) |
| rs2240749  | 68636318 | G/A | 0.12 | 0.14 | 0.2663 | 0.83 (0.59-1.16) |
| rs16975998 | 68636365 | A/C | 0.12 | 0.14 | 0.2663 | 0.83 (0.59-1.16) |
| rs16976000 | 68636583 | G/A | 0.05 | 0.05 | 0.9530 | 1.02 (0.63-1.64) |
| rs16976002 | 68636917 | G/T | 0.05 | 0.05 | 0.9676 | 1.01 (0.62-1.63) |
| rs1843622  | 68637507 | A/G | 0.27 | 0.32 | 0.0814 | 0.81 (0.63-1.03) |
| rs11656782 | 68637662 | A/G | 0.12 | 0.14 | 0.3391 | 0.85 (0.61-1.19) |
| rs4584866  | 68638264 | A/C | 0.12 | 0.14 | 0.3289 | 0.85 (0.61-1.18) |
| rs16976008 | 68638688 | G/A | 0.12 | 0.14 | 0.3216 | 0.85 (0.61-1.18) |
| rs16976009 | 68638765 | A/G | 0.06 | 0.05 | 0.9127 | 1.03 (0.63-1.66) |
| rs16976011 | 68638916 | G/T | 0.12 | 0.14 | 0.3257 | 0.85 (0.61-1.18) |
| rs11652209 | 68639314 | A/G | 0.07 | 0.09 | 0.2012 | 0.76 (0.49-1.17) |
| rs16976024 | 68641368 | G/A | 0.12 | 0.14 | 0.2671 | 0.83 (0.59-1.16) |
| rs9891997  | 68641403 | A/G | 0.15 | 0.18 | 0.1991 | 0.82 (0.60-1.11) |
| rs16976031 | 68642461 | A/G | 0.12 | 0.14 | 0.2713 | 0.83 (0.59-1.16) |
| rs55829401 | 68643240 | A/C | 0.06 | 0.08 | 0.1487 | 0.72 (0.46-1.13) |
| rs16976038 | 68646652 | A/G | 0.11 | 0.14 | 0.1713 | 0.79 (0.56-1.11) |
| rs2191113  | 68647821 | A/G | 0.27 | 0.32 | 0.0754 | 0.80 (0.63-1.03) |
| rs8072436  | 68648042 | A/G | 0.11 | 0.14 | 0.1545 | 0.78 (0.55-1.10) |
| rs2215270  | 68648169 | A/G | 0.11 | 0.14 | 0.1843 | 0.79 (0.56-1.12) |
| rs11657599 | 68648697 | A/C | 0.06 | 0.08 | 0.1200 | 0.70 (0.44-1.11) |
| rs11654012 | 68648897 | G/A | 0.06 | 0.08 | 0.1195 | 0.70 (0.44-1.11) |
| rs58459968 | 68656064 | A/G | 0.16 | 0.16 | 0.8680 | 1.03 (0.76-1.38) |
| rs9890889  | 68661880 | C/A | 0.49 | 0.44 | 0.0631 | 1.24 (0.99-1.54) |
| rs9889243  | 68665634 | G/A | 0.28 | 0.29 | 0.6747 | 0.95 (0.74-1.21) |
| rs2367005  | 68666455 | G/T | 0.28 | 0.29 | 0.6359 | 0.94 (0.74-1.20) |
| rs17792069 | 68666983 | C/T | 0.08 | 0.08 | 0.7862 | 1.06 (0.71-1.57) |
| rs2159313  | 68670002 | A/G | 0.06 | 0.06 | 0.6298 | 1.12 (0.71-1.75) |
| rs17792098 | 68670039 | G/A | 0.18 | 0.19 | 0.5287 | 0.91 (0.69-1.21) |
| rs2109054  | 68670273 | A/C | 0.16 | 0.17 | 0.7813 | 0.96 (0.71-1.29) |
| rs7213431  | 68672150 | G/A | 0.17 | 0.17 | 0.9015 | 0.98 (0.73-1.32) |
| rs17792120 | 68672312 | A/G | 0.08 | 0.08 | 0.8866 | 1.03 (0.68-1.55) |
| rs12150650 | 68674056 | A/G | 0.13 | 0.12 | 0.7651 | 1.05 (0.76-1.46) |
| rs11077513 | 68675159 | C/T | 0.13 | 0.12 | 0.7324 | 1.06 (0.76-1.47) |
| rs57315136 | 68675650 | A/C | 0.06 | 0.06 | 0.9267 | 0.98 (0.63-1.53) |
| rs7221340  | 68677116 | G/A | 0.14 | 0.13 | 0.5634 | 1.10 (0.80-1.51) |
| rs9302921  | 68678695 | G/A | 0.12 | 0.12 | 0.8803 | 1.03 (0.73-1.44) |
| rs7222597  | 68679407 | T/C | 0.13 | 0.12 | 0.7796 | 1.05 (0.75-1.46) |
| rs7221764  | 68679628 | A/G | 0.23 | 0.23 | 0.8343 | 1.03 (0.79-1.33) |
| rs7208235  | 68679633 | C/T | 0.13 | 0.12 | 0.7693 | 1.05 (0.76-1.46) |
| rs7223156  | 68679731 | T/C | 0.13 | 0.12 | 0.8042 | 1.04 (0.75-1.45) |
| rs9894956  | 68680109 | G/A | 0.13 | 0.12 | 0.7867 | 1.05 (0.75-1.45) |
| rs8070448  | 68680421 | C/T | 0.23 | 0.23 | 0.8597 | 1.02 (0.79-1.33) |
| rs8065888  | 68680439 | A/C | 0.13 | 0.12 | 0.7768 | 1.05 (0.75-1.46) |

|             |          |     |      |      |        |                  |
|-------------|----------|-----|------|------|--------|------------------|
| rs8065892   | 68680453 | T/C | 0.13 | 0.12 | 0.7768 | 1.05 (0.75-1.46) |
| rs8069361   | 68681016 | A/G | 0.13 | 0.12 | 0.7768 | 1.05 (0.75-1.46) |
| rs8071080   | 68681019 | G/A | 0.13 | 0.12 | 0.7768 | 1.05 (0.75-1.46) |
| rs9903405   | 68681409 | G/A | 0.13 | 0.12 | 0.7768 | 1.05 (0.75-1.46) |
| rs9901640   | 68681713 | T/G | 0.13 | 0.12 | 0.7768 | 1.05 (0.75-1.46) |
| rs9904269   | 68681749 | G/A | 0.13 | 0.12 | 0.7768 | 1.05 (0.75-1.46) |
| rs111247606 | 68681807 | A/G | 0.06 | 0.05 | 0.1747 | 1.37 (0.86-2.18) |
| rs9916137   | 68681952 | C/T | 0.13 | 0.12 | 0.4993 | 1.12 (0.80-1.56) |
| rs9908007   | 68682106 | T/G | 0.13 | 0.12 | 0.7768 | 1.05 (0.75-1.46) |
| rs4493104   | 68682335 | G/A | 0.13 | 0.12 | 0.7593 | 1.05 (0.76-1.46) |
| rs1486293   | 68682555 | C/T | 0.13 | 0.12 | 0.7649 | 1.05 (0.76-1.46) |
| rs1486294   | 68682720 | C/T | 0.13 | 0.12 | 0.7847 | 1.05 (0.75-1.45) |
| rs7220283   | 68682767 | T/C | 0.13 | 0.12 | 0.7743 | 1.05 (0.75-1.46) |
| rs1486295   | 68682937 | T/C | 0.13 | 0.12 | 0.7847 | 1.05 (0.75-1.45) |
| rs7210142   | 68683203 | C/T | 0.13 | 0.12 | 0.5611 | 1.10 (0.79-1.53) |
| rs1486296   | 68683408 | T/C | 0.13 | 0.12 | 0.7847 | 1.05 (0.75-1.45) |
| rs2041265   | 68684282 | C/A | 0.23 | 0.23 | 0.7341 | 1.05 (0.81-1.36) |
| rs8073288   | 68684927 | G/A | 0.13 | 0.12 | 0.7743 | 1.05 (0.75-1.46) |
| rs11870958  | 68685255 | A/G | 0.13 | 0.12 | 0.7348 | 1.06 (0.76-1.48) |
| rs16976154  | 68686416 | G/A | 0.12 | 0.12 | 0.9284 | 1.02 (0.73-1.42) |
| rs4793500   | 68686549 | C/A | 0.13 | 0.16 | 0.1574 | 0.79 (0.57-1.10) |
| rs28653114  | 68687916 | T/C | 0.13 | 0.12 | 0.7593 | 1.05 (0.76-1.46) |
| rs8066396   | 68688689 | G/T | 0.13 | 0.12 | 0.7671 | 1.05 (0.76-1.46) |
| rs8066016   | 68689007 | T/C | 0.23 | 0.23 | 0.8251 | 1.03 (0.79-1.34) |
| rs9896299   | 68689090 | G/A | 0.13 | 0.12 | 0.7746 | 1.05 (0.75-1.46) |
| rs11868346  | 68689387 | G/T | 0.13 | 0.12 | 0.7642 | 1.05 (0.76-1.46) |
| rs6501402   | 68689403 | T/C | 0.23 | 0.23 | 0.8251 | 1.03 (0.79-1.34) |
| rs11868388  | 68689555 | C/T | 0.13 | 0.12 | 0.8193 | 1.04 (0.75-1.45) |
| rs11868390  | 68689587 | C/T | 0.13 | 0.12 | 0.7746 | 1.05 (0.75-1.46) |
| rs11652213  | 68689838 | C/T | 0.13 | 0.12 | 0.7642 | 1.05 (0.76-1.46) |
| rs7214351   | 68689945 | T/C | 0.13 | 0.12 | 0.7746 | 1.05 (0.75-1.46) |
| rs2367006   | 68690256 | C/T | 0.06 | 0.06 | 0.9887 | 1.00 (0.64-1.56) |
| rs4324177   | 68690653 | T/C | 0.06 | 0.07 | 0.3764 | 0.82 (0.52-1.29) |
| rs9899334   | 68692854 | G/A | 0.13 | 0.12 | 0.7666 | 1.05 (0.76-1.46) |
| rs72863206  | 68695425 | A/G | 0.10 | 0.10 | 0.9428 | 1.01 (0.71-1.45) |
| rs7208743   | 68695559 | C/T | 0.13 | 0.12 | 0.7896 | 1.05 (0.75-1.45) |
| rs7223502   | 68695586 | T/C | 0.13 | 0.12 | 0.7821 | 1.05 (0.75-1.46) |
| rs7209270   | 68696131 | G/A | 0.13 | 0.12 | 0.7896 | 1.05 (0.75-1.45) |
| rs9807096   | 68699516 | C/T | 0.10 | 0.10 | 0.9948 | 1.00 (0.70-1.43) |
| rs112453206 | 68699822 | A/G | 0.10 | 0.10 | 0.9732 | 1.01 (0.70-1.44) |
| rs62070574  | 68700098 | C/T | 0.06 | 0.06 | 0.9922 | 1.00 (0.64-1.56) |
| rs9914343   | 68700594 | G/A | 0.13 | 0.12 | 0.7942 | 1.04 (0.75-1.45) |
| rs2159311   | 68700733 | A/C | 0.13 | 0.12 | 0.7942 | 1.04 (0.75-1.45) |
| rs2109048   | 68700871 | G/A | 0.13 | 0.12 | 0.7942 | 1.04 (0.75-1.45) |
| rs2109049   | 68700994 | C/T | 0.13 | 0.12 | 0.8069 | 1.04 (0.75-1.45) |
| rs72863209  | 68702080 | G/A | 0.10 | 0.10 | 0.9732 | 1.01 (0.70-1.44) |
| rs28589646  | 68702653 | A/G | 0.13 | 0.12 | 0.7942 | 1.04 (0.75-1.45) |
| rs11654276  | 68703598 | G/T | 0.13 | 0.12 | 0.7942 | 1.04 (0.75-1.45) |
| rs17763873  | 68703689 | G/A | 0.06 | 0.05 | 0.2054 | 1.34 (0.84-2.13) |
| rs17176195  | 68704203 | C/T | 0.13 | 0.12 | 0.7942 | 1.04 (0.75-1.45) |
| rs7208937   | 68705414 | A/G | 0.13 | 0.12 | 0.8046 | 1.04 (0.75-1.45) |
| rs10512541  | 68706023 | A/G | 0.13 | 0.12 | 0.8046 | 1.04 (0.75-1.45) |

|             |          |     |      |      |        |                  |
|-------------|----------|-----|------|------|--------|------------------|
| rs9905058   | 68706617 | T/C | 0.13 | 0.12 | 0.7968 | 1.04 (0.75-1.45) |
| rs9906397   | 68706827 | C/A | 0.13 | 0.12 | 0.7741 | 1.05 (0.75-1.46) |
| rs17763885  | 68707044 | G/A | 0.10 | 0.10 | 0.8387 | 1.04 (0.72-1.49) |
| rs139865712 | 68707162 | T/C | 0.06 | 0.05 | 0.1774 | 1.37 (0.86-2.17) |
| rs35799893  | 68707301 | T/C | 0.13 | 0.12 | 0.7642 | 1.05 (0.76-1.46) |
| rs9893967   | 68708402 | A/G | 0.13 | 0.12 | 0.7963 | 1.04 (0.75-1.46) |
| rs113887955 | 68709483 | T/C | 0.06 | 0.05 | 0.1911 | 1.35 (0.85-2.15) |
| rs7226235   | 68711379 | C/A | 0.13 | 0.12 | 0.7746 | 1.05 (0.75-1.46) |
| rs12939443  | 68711729 | A/C | 0.13 | 0.12 | 0.7717 | 1.05 (0.76-1.46) |
| rs7211118   | 68711999 | T/C | 0.13 | 0.12 | 0.7717 | 1.05 (0.76-1.46) |
| rs740674    | 68714096 | G/A | 0.12 | 0.12 | 0.8658 | 1.03 (0.74-1.43) |
| rs62070600  | 68714214 | G/A | 0.06 | 0.06 | 0.8448 | 0.96 (0.60-1.51) |
| rs78107100  | 68715242 | C/T | 0.14 | 0.15 | 0.6221 | 0.92 (0.67-1.27) |
| rs8065001   | 68715520 | T/G | 0.22 | 0.21 | 0.7338 | 1.05 (0.80-1.36) |
| rs8065129   | 68715575 | A/G | 0.22 | 0.22 | 0.7461 | 1.04 (0.80-1.36) |
| rs8065449   | 68715808 | A/G | 0.12 | 0.11 | 0.8072 | 1.04 (0.74-1.47) |
| rs72863217  | 68715837 | G/T | 0.06 | 0.05 | 0.1695 | 1.37 (0.86-2.19) |
| rs8069523   | 68715988 | A/G | 0.22 | 0.21 | 0.7373 | 1.05 (0.80-1.36) |
| rs8070698   | 68716005 | T/C | 0.12 | 0.11 | 0.7916 | 1.05 (0.75-1.47) |
| rs9907805   | 68716927 | A/G | 0.22 | 0.22 | 0.7440 | 1.04 (0.80-1.36) |
| rs113689784 | 68717241 | T/C | 0.10 | 0.10 | 0.7881 | 1.05 (0.73-1.51) |
| rs717419    | 68718188 | C/T | 0.36 | 0.37 | 0.7105 | 0.96 (0.76-1.20) |
| rs4793501   | 68718734 | T/C | 0.36 | 0.37 | 0.7018 | 0.96 (0.76-1.20) |
| rs9911558   | 68718967 | T/C | 0.14 | 0.15 | 0.6364 | 0.93 (0.67-1.27) |
| rs9912421   | 68719000 | G/A | 0.24 | 0.25 | 0.7801 | 0.96 (0.75-1.25) |
| rs8082019   | 68719293 | C/T | 0.24 | 0.25 | 0.7801 | 0.96 (0.75-1.25) |
| rs73992467  | 68719858 | G/A | 0.14 | 0.15 | 0.6411 | 0.93 (0.67-1.28) |
| rs143342961 | 68720220 | G/A | 0.14 | 0.15 | 0.6411 | 0.93 (0.67-1.28) |
| rs1024642   | 68722140 | T/C | 0.22 | 0.21 | 0.7384 | 1.05 (0.80-1.36) |
| rs76156487  | 68722484 | C/T | 0.12 | 0.11 | 0.8034 | 1.04 (0.74-1.47) |
| rs1024644   | 68723037 | C/T | 0.12 | 0.11 | 0.8346 | 1.04 (0.74-1.46) |
| rs72863225  | 68723531 | A/G | 0.10 | 0.10 | 0.7860 | 1.05 (0.73-1.51) |
| rs16976178  | 68723707 | A/G | 0.22 | 0.22 | 0.7472 | 1.04 (0.80-1.36) |
| rs929474    | 68724036 | A/G | 0.35 | 0.34 | 0.9113 | 1.01 (0.80-1.28) |
| rs7213980   | 68724110 | C/T | 0.22 | 0.22 | 0.7472 | 1.04 (0.80-1.36) |
| rs1963803   | 68724366 | T/G | 0.10 | 0.10 | 0.7946 | 1.05 (0.73-1.50) |
| rs9896415   | 68724374 | T/C | 0.12 | 0.12 | 0.8581 | 1.03 (0.74-1.45) |
| rs9903552   | 68724590 | G/T | 0.12 | 0.12 | 0.8581 | 1.03 (0.74-1.45) |
| rs9903165   | 68724984 | T/C | 0.14 | 0.15 | 0.6029 | 0.92 (0.67-1.26) |
| rs1029754   | 68725104 | G/A | 0.10 | 0.10 | 0.8033 | 1.05 (0.73-1.50) |
| rs1029755   | 68725134 | A/G | 0.24 | 0.25 | 0.7836 | 0.97 (0.75-1.25) |
| rs1029756   | 68725240 | C/T | 0.10 | 0.10 | 0.8033 | 1.05 (0.73-1.50) |
| rs72863230  | 68726163 | A/G | 0.10 | 0.10 | 0.8119 | 1.05 (0.73-1.50) |
| rs74785857  | 68726651 | T/C | 0.10 | 0.10 | 0.8119 | 1.05 (0.73-1.50) |
| rs9910995   | 68726686 | A/G | 0.14 | 0.15 | 0.5869 | 0.92 (0.67-1.26) |
| rs9889316   | 68726935 | A/G | 0.14 | 0.15 | 0.5869 | 0.92 (0.67-1.26) |
| rs9898253   | 68727070 | C/T | 0.24 | 0.25 | 0.7648 | 0.96 (0.74-1.24) |
| rs9892374   | 68727469 | T/C | 0.14 | 0.15 | 0.5813 | 0.91 (0.66-1.26) |
| rs16976201  | 68728148 | G/A | 0.06 | 0.07 | 0.5513 | 0.87 (0.55-1.38) |
| rs4141188   | 68728238 | T/C | 0.10 | 0.10 | 0.8119 | 1.05 (0.73-1.50) |
| rs4141187   | 68728276 | T/G | 0.24 | 0.25 | 0.7502 | 0.96 (0.74-1.24) |
| rs8069427   | 68729064 | G/T | 0.24 | 0.25 | 0.7502 | 0.96 (0.74-1.24) |

|             |          |     |      |      |        |                  |
|-------------|----------|-----|------|------|--------|------------------|
| rs72863238  | 68730119 | A/G | 0.10 | 0.10 | 0.8119 | 1.05 (0.73-1.50) |
| rs56859431  | 68730321 | A/C | 0.10 | 0.10 | 0.8119 | 1.05 (0.73-1.50) |
| rs72863242  | 68730618 | T/C | 0.06 | 0.05 | 0.1835 | 1.36 (0.86-2.16) |
| rs16976203  | 68730794 | C/T | 0.10 | 0.10 | 0.8119 | 1.05 (0.73-1.50) |
| rs9907514   | 68731219 | A/G | 0.36 | 0.37 | 0.6955 | 0.96 (0.76-1.20) |
| rs9907787   | 68731335 | A/G | 0.12 | 0.12 | 0.8787 | 1.03 (0.73-1.44) |
| rs9916370   | 68731347 | C/T | 0.14 | 0.15 | 0.5830 | 0.91 (0.66-1.26) |
| rs16976206  | 68732090 | C/T | 0.24 | 0.25 | 0.7540 | 0.96 (0.74-1.24) |
| rs16976207  | 68732562 | T/C | 0.06 | 0.07 | 0.5318 | 0.87 (0.55-1.37) |
| rs16976209  | 68732672 | A/G | 0.10 | 0.10 | 0.8119 | 1.05 (0.73-1.50) |
| rs72869790  | 68733304 | C/T | 0.06 | 0.05 | 0.1768 | 1.37 (0.86-2.17) |
| rs11868394  | 68734173 | A/G | 0.06 | 0.08 | 0.1753 | 0.73 (0.46-1.16) |
| rs72869791  | 68734557 | G/T | 0.06 | 0.05 | 0.1702 | 1.37 (0.86-2.19) |
| rs8077765   | 68735106 | T/C | 0.24 | 0.25 | 0.7540 | 0.96 (0.74-1.24) |
| rs9891034   | 68736046 | A/G | 0.24 | 0.25 | 0.7585 | 0.96 (0.74-1.24) |
| rs72869794  | 68736315 | C/T | 0.06 | 0.05 | 0.1708 | 1.37 (0.86-2.18) |
| rs62070604  | 68736480 | C/T | 0.06 | 0.07 | 0.5422 | 0.87 (0.55-1.37) |
| rs72869795  | 68736575 | T/C | 0.06 | 0.05 | 0.1715 | 1.37 (0.86-2.18) |
| rs2058177   | 68737418 | G/A | 0.24 | 0.25 | 0.6970 | 0.95 (0.73-1.23) |
| rs146631216 | 68740577 | T/C | 0.03 | 0.02 | 0.5796 | 1.21 (0.62-2.33) |
| rs16976213  | 68741024 | G/A | 0.03 | 0.03 | 0.7318 | 1.12 (0.58-2.16) |
| rs117902866 | 68742058 | A/C | 0.03 | 0.03 | 0.7501 | 1.11 (0.58-2.15) |
| rs114484479 | 68743570 | G/A | 0.03 | 0.03 | 0.9464 | 1.02 (0.53-1.97) |
| rs34730313  | 68743595 | A/G | 0.03 | 0.03 | 0.8286 | 1.08 (0.56-2.07) |
| rs116605004 | 68744021 | T/G | 0.03 | 0.03 | 0.8286 | 1.08 (0.56-2.07) |
| rs74768968  | 68744620 | T/C | 0.03 | 0.03 | 0.8275 | 1.08 (0.56-2.07) |
| rs116723200 | 68745437 | C/T | 0.03 | 0.03 | 0.8286 | 1.08 (0.56-2.07) |
| rs8069222   | 68745923 | G/A | 0.45 | 0.47 | 0.5402 | 0.93 (0.75-1.16) |
| rs16976223  | 68746950 | C/T | 0.04 | 0.03 | 0.3615 | 1.31 (0.73-2.35) |
| rs62070608  | 68747425 | T/G | 0.01 | 0.02 | 0.2507 | 0.59 (0.24-1.47) |
| rs62070609  | 68747590 | A/C | 0.01 | 0.02 | 0.2469 | 0.59 (0.24-1.46) |
| rs78156304  | 68748344 | C/A | 0.03 | 0.03 | 0.5179 | 1.23 (0.66-2.31) |
| rs62070610  | 68748458 | C/T | 0.01 | 0.02 | 0.2411 | 0.59 (0.24-1.45) |
| rs16976224  | 68748462 | G/A | 0.03 | 0.03 | 0.5179 | 1.23 (0.66-2.31) |
| rs62070611  | 68748657 | A/G | 0.01 | 0.02 | 0.2415 | 0.59 (0.24-1.45) |
| rs11869764  | 68749159 | G/T | 0.05 | 0.05 | 0.5758 | 0.86 (0.51-1.45) |
| rs11869301  | 68749376 | G/A | 0.05 | 0.05 | 0.6533 | 0.89 (0.53-1.49) |

SNP, single nucleotide polymorphism; BP, base position; MAF, minor allele frequency; TPP, thyrotoxic hypokalemic periodic paralysis; OR, odds ratio; CI, confidence interval.

**eTable 8. Logistic regression analysis for SNPs in the two regions associated with TPP in the combined population**

| Chr.       | SNP              | Chr. position     | Annotated genes   | OR                      | Single-locus test <i>P</i>     | <i>r</i> <sup>2</sup> with SNP A | Conditional regression <i>P</i> values |                                 |
|------------|------------------|-------------------|-------------------|-------------------------|--------------------------------|----------------------------------|----------------------------------------|---------------------------------|
|            |                  |                   |                   |                         |                                |                                  | other SNP, conditional on SNP A        | SNP A, conditional on other SNP |
| 4q31.3     | <b>rs1352714</b> | <b>155243604</b>  | <i>DCHS2</i>      | <b>1.58</b>             | <b>1.24 × 10<sup>-8</sup></b>  | /                                | /                                      | /                               |
|            | rs7681004        | 155332330         | <i>DCHS2</i>      | 1.68                    | 5.56 × 10 <sup>-5</sup>        | 0.16                             | 0.0202                                 | 0.0005                          |
| 17q24.3    | rs623011         | 68259446          | <i>KCNJ2/SOX9</i> | 1.96                    | 1.33 × 10 <sup>-22</sup>       | 0.89                             | 0.6850                                 | 0.0035                          |
|            | rs17714860       | 68272354          | <i>KCNJ2/SOX9</i> | 1.74                    | 2.31 × 10 <sup>-8</sup>        | 0.20                             | 0.0750                                 | 1.39 × 10 <sup>-16</sup>        |
|            | rs411079         | 68291371          | <i>KCNJ2/SOX9</i> | 1.64                    | 1.26 × 10 <sup>-10</sup>       | 0.42                             | 0.5739                                 | 2.01 × 10 <sup>-14</sup>        |
|            | rs7222503        | 68299785          | <i>KCNJ2/SOX9</i> | 1.79                    | 6.17 × 10 <sup>-8</sup>        | 0.13                             | 0.0455                                 | 1.43 × 10 <sup>-18</sup>        |
|            | rs312729         | 68306837          | <i>KCNJ2/SOX9</i> | 2.08                    | 8.02 × 10 <sup>-29</sup>       | 0.92                             | 0.2675                                 | 0.0697                          |
|            | <b>rs312691</b>  | <b>68326338</b>   | <i>KCNJ2/SOX9</i> | <b>2.02</b>             | <b>6.08 × 10<sup>-24</sup></b> | /                                | /                                      | /                               |
|            | rs12451295       | 68376823          | <i>KCNJ2/SOX9</i> | 1.61                    | 2.41 × 10 <sup>-13</sup>       | 0.46                             | 0.6154                                 | 3.86 × 10 <sup>-13</sup>        |
|            | rs16975694       | 68380657          | <i>KCNJ2/SOX9</i> | 1.45                    | 1.30 × 10 <sup>-6</sup>        | 0.27                             | 0.4012                                 | 4.01 × 10 <sup>-19</sup>        |
|            | rs16975792       | 68433725          | <i>KCNJ2/SOX9</i> | 1.46                    | 4.04 × 10 <sup>-8</sup>        | 0.26                             | 0.9421                                 | 3.61 × 10 <sup>-18</sup>        |
|            | rs1605750        | 68471073          | <i>KCNJ2/SOX9</i> | 1.37                    | 4.17 × 10 <sup>-5</sup>        | 0.19                             | 0.5151                                 | 1.13 × 10 <sup>-20</sup>        |
| rs62069783 | 68492256         | <i>KCNJ2/SOX9</i> | 1.37              | 6.41 × 10 <sup>-6</sup> | 0.24                           | 0.8831                           | 2.41 × 10 <sup>-20</sup>               |                                 |

SNP: single nucleotide polymorphism, OR: odds ratio for the minor allele. SNP A meant SNP with the most significance and could model the entire association signal within each susceptibility region and was shown in bold letters.



**eTable 9.** The Association of Each Prediction Model With TPP in Total GD Participants

| Markers | wGRS        | P Value                  | OR (95%CI)       | AUC (95%CI)      | Threshold | Sensitivity (%) | Specificity (%) | Group   | wGRS        | GD No. (%) | TPP No. (%) | OR (95%CI)          | P value                  |
|---------|-------------|--------------------------|------------------|------------------|-----------|-----------------|-----------------|---------|-------------|------------|-------------|---------------------|--------------------------|
| 3 SNPs  | 3.44 ± 1.34 | 5.71 × 10 <sup>-55</sup> | 1.99 (1.83-2.17) | 0.74 (0.72-0.76) | 4.78      | 66              | 72              | Group 1 | <3.44       | 1162 (72)  | 177 (34)    | Reference           |                          |
|         |             |                          |                  |                  |           |                 |                 | Group 2 | 3.44-4.78   | 329 (20)   | 181 (35)    | 3.61 (2.84-4.59)    | 2.43 × 10 <sup>-27</sup> |
|         |             |                          |                  |                  |           |                 |                 | Group 3 | 4.78-6.12   | 100 (6)    | 115 (22)    | 7.55 (5.53-10.31)   | 1.01 × 10 <sup>-44</sup> |
|         |             |                          |                  |                  |           |                 |                 | Group 4 | >6.12       | 34 (2)     | 49 (9)      | 9.46 (5.94-15.07)   | 1.59 × 10 <sup>-28</sup> |
| 11 SNPs | 9.60 ± 2.60 | 7.93 × 10 <sup>-73</sup> | 1.62 (1.54-1.71) | 0.80 (0.78-0.82) | 12.2      | 82              | 68              | Group 1 | <9.60       | 1037 (63)  | 76 (15)     | Reference           |                          |
|         |             |                          |                  |                  |           |                 |                 | Group 2 | 9.60-12.20  | 422 (26)   | 187 (38)    | 6.05 (4.53-8.08)    | 1.32 × 10 <sup>-39</sup> |
|         |             |                          |                  |                  |           |                 |                 | Group 3 | 12.20-14.80 | 182 (11)   | 217 (44)    | 16.27 (11.99-22.07) | 1.8 × 10 <sup>-94</sup>  |
|         |             |                          |                  |                  |           |                 |                 | Group 4 | >14.80      | 8 (0.5)    | 11 (2)      | 18.76 (7.33-48.03)  | 1.17 × 10 <sup>-16</sup> |

wGRS, weighted genetic risk score; GD, Graves' disease; TPP, thyrotoxic hypokalemic periodic paralysis; Freq, frequency; OR, odds ratio; CI, confidence interval.

3 SNPs: rs1352714 + rs2186564 + rs312691

11 SNPs: rs13400534+rs1352714 +rs7681004+ rs61748643+rs12194555+rs541442+rs7927729+rs2186564+rs12430111+rs7222503+ rs312691

**eTable 10. Primers of three TPP candidate genes and for real-time reverse transcription PCR.**

| Gene Segment | Primers Sequence (5' → 3')   | Product Size (bp) |
|--------------|------------------------------|-------------------|
| DCHS2-E0-1F  | 5'-ACTGAAGAGGCTCCTGGATT-3'   | 511               |
| DCHS2-E0-1R  | 5'-GCGACGAAGCTGTAGTGGT-3'    |                   |
| DCHS2-E0-2F  | 5'-TCACCCTTTCCGTAGATGAG-3'   | 502               |
| DCHS2-E0-2R  | 5'-AAAAGCGGTGACGGTAGTG-3'    |                   |
| DCHS2-E0-3F  | 5'-TTCAGCACTCAGGGCTACAC-3'   | 522               |
| DCHS2-E0-3R  | 5'-GTCCAGAGGTCTCCACACTC-3'   |                   |
| DCHS2-E0-4F  | 5'-CTTTGAGCAGGACGAGTACC-3'   | 532               |
| DCHS2-E0-4R  | 5'-TTCCAAGGACAGAGAGATGC-3'   |                   |
| DCHS2-E0-5F  | 5'-TGACTGGGAGAAGGAAGATG-3'   | 493               |
| DCHS2-E0-5R  | 5'-GGAATCAATGGCAAAAAGATG-3'  |                   |
| DCHS2-E0-6F  | 5'-AGCATTACAAGGCCTCAGTG-3'   | 502               |
| DCHS2-E0-6R  | 5'-TTCCTAGGCCAACTCACAAC-3'   |                   |
| DCHS2-E1F    | 5'-TTAGTCACTGGGCTCTCTGG-3'   | 496               |
| DCHS2-E1R    | 5'-CAGCAACAGCAGCAACTAGA-3'   |                   |
| DCHS2-E2F    | 5'-TGCCAGAGACATGAAGTTGA-3'   | 513               |
| DCHS2-E2R    | 5'-AAGCAATCCATGACCGAATA-3'   |                   |
| DCHS2-E3F    | 5'-CTGTCCGGTGTTCCTTGACTT-3'  | 505               |
| DCHS2-E3R    | 5'-AGCCGTTACACAGCTAGTC-3'    |                   |
| DCHS2-E4F    | 5'-GGGGGAATTATCACAGAAGG-3'   | 500               |
| DCHS2-E4R    | 5'-AACTTCAGCAAAGGAAAGAGG-3'  |                   |
| DCHS2-E5F    | 5'-TGTCTGCTGTCCACTGTGAT-3'   | 497               |
| DCHS2-E5R    | 5'-AGATGGAGAAGGTGTGCAAG-3'   |                   |
| DCHS2-E6F    | 5'-TTCAGCAAAAACCCATTTGT-3'   | 510               |
| DCHS2-E6R    | 5'-GGCCAATAAAGACCACAAGA-3'   |                   |
| DCHS2-E7F    | 5'-TGCTAAAGAAGGCTTTGTGC-3'   | 507               |
| DCHS2-E7R    | 5'-GAGAGAGGCCAGAAATGTT-3'    |                   |
| DCHS2-E8F    | 5'-CAAAGCCTAATCCAGAGCAA-3'   | 503               |
| DCHS2-E8R    | 5'-CTGTTTGTTCATCCAGGCTCT-3'  |                   |
| DCHS2-E9F    | 5'-TGTGGCCAGTTAACACATA-3'    | 505               |
| DCHS2-E9R    | 5'-AAAGAGCAAGCCACAGTTTG-3'   |                   |
| DCHS2-E10-1F | 5'-GTGGTTGTCCCCTCTCTCTT-3'   | 535               |
| DCHS2-E10-1R | 5'-CTCGATAACGACTGTCAGCA-3'   |                   |
| DCHS2-E10-2F | 5'-GTGCGGAAGACAGAGACAGT-3'   | 512               |
| DCHS2-E10-2R | 5'-ATTTTGCAAGAATCCGTCCT-3'   |                   |
| DCHS2-E10-3F | 5'-GCCTCGCCTCTTAGGTACTC-3'   | 503               |
| DCHS2-E10-3R | 5'-CGACTTGAGTTTTCTCAATCCT-3' |                   |

|              |                              |     |
|--------------|------------------------------|-----|
| DCHS2-E11F   | 5'-ATACCCGGGAAAACACTGAAAC-3' | 497 |
| DCHS2-E11R   | 5'-TGGACACCTCGTTTTCTTGT-3'   |     |
| DCHS2-E12F   | 5'-GCCTGTGTCTTGTCTGCTC-3'    | 499 |
| DCHS2-E12R   | 5'-GCATTAACCTGAAGCACCAT-3'   |     |
| DCHS2-E13F   | 5'-CCATAGCAACCACCTTTCAA-3'   | 537 |
| DCHS2-E13R   | 5'-CCCAGAAGGGGATAGTTGAT-3'   |     |
| DCHS2-E14F   | 5'-TTTTGACTGCAATCCATCAG-3'   | 499 |
| DCHS2-E14R   | 5'-CCTTAAATTGGGAGGCAGAT-3'   |     |
| DCHS2-E15F   | 5'-AGGTGATGGACTCGTGAAAG-3'   | 550 |
| DCHS2-E15R   | 5'-GCTATGTGCAATGCTCTCAA-3'   |     |
| DCHS2-E16-1F | 5'-TCACATACATGGAAGGAATTTG-3' | 507 |
| DCHS2-E16-1R | 5'-TCCTATGGGAACATTCTCCTC-3'  |     |
| DCHS2-E16-2F | 5'-TAGACAGCTCAACCGGAGAC-3'   | 497 |
| DCHS2-E16-2R | 5'-AGTGGGGTTGTGGTCATTTA-3'   |     |
| DCHS2-E16-3F | 5'-TCCCGTCTTGACAGAGAAAG-3'   | 497 |
| DCHS2-E16-3R | 5'-GAAGGGAAAATGGGAGAAAC-3'   |     |
| DCHS2-E17F   | 5'-TGTTGCTTTTCTTCCATTTTC-3'  | 425 |
| DCHS2-E17R   | 5'-GTGTTTCTGTGTGGATGCAA-3'   |     |
| DCHS2-E18F   | 5'-AGCAAGAACAGCCAAAAGAG-3'   | 500 |
| DCHS2-E18R   | 5'-GGTATGAATTGTGGCCTTTG-3'   |     |
| DCHS2-E19F   | 5'-GAGCCAGTGCTACCTGGTTA-3'   | 507 |
| DCHS2-E19R   | 5'-ACTCAGTCAGCATCCTGGAA-3'   |     |
| DCHS2-E20-1F | 5'-GAGGGCAGAGCCTTTATCAT-3'   | 510 |
| DCHS2-E20-1R | 5'-ACCAGAAGCCTCATCAGTCA-3'   |     |
| DCHS2-E20-2F | 5'-AGATGCTGAAGTGGGAACAG-3'   | 500 |
| DCHS2-E20-2R | 5'-TTAACTGCAGCCAGATAGGG-3'   |     |
| DCHS2-E20-3F | 5'-CGCCTACAAACCAGACAACT-3'   | 502 |
| DCHS2-E20-3R | 5'-CTGTCTTCTGCCCTGTCATT-3'   |     |
| DCHS2-E21F   | 5'-GGATCTGGCTCATTGAAGAC-3'   | 498 |
| DCHS2-E21R   | 5'-TTTGAAGGGCAGGATAGACA-3'   |     |
| DCHS2-E22F   | 5'-AGATTTCAACCACTGCACTCC-3'  | 493 |
| DCHS2-E22R   | 5'-AAAATGTACATGGCCTGGAA-3'   |     |
| DCHS2-E23F   | 5'-AAACAGTCGGTTCCTCACAG-3'   | 507 |
| DCHS2-E23R   | 5'-GCAGAGGGCTCTCTAGTTCA-3'   |     |
| DCHS2-E24F   | 5'-TACAGTCTGGCTCTCCGAAA-3'   | 523 |
| DCHS2-E24R   | 5'-TTGCTTGGTTGTTGAGGATT-3'   |     |
| DCHS2-E25F   | 5'-AATCAAGCCAAGAAAGAGCA-3'   | 492 |
| DCHS2-E25R   | 5'-TATCGGCGATGGAAGACTTA-3'   |     |
| DCHS2-E26F   | 5'-CCTTCAGCCTTTAAGCACAA-3'   | 502 |

|                       |                                |     |
|-----------------------|--------------------------------|-----|
| DCHS2-E26R            | 5'-TGGGATAATTGCCTGAACTG-3'     |     |
| DCHS2-E27-1F          | 5'-ACTGCCGATTAATGGATCA-3'      | 496 |
| DCHS2-E27-1R          | 5'-CACTGTCAGATGCCAGAATG-3'     |     |
| DCHS2-E27-2F          | 5'-TCGGTTATCTTGTGTTGCTTC-3'    | 515 |
| DCHS2-E27-2R          | 5'-GGAAATAGGCAGATTTTCTGG-3'    |     |
| DCHS2-E27-3F          | 5'-GTCCAAGCTCAGATGCAGA-3'      | 493 |
| DCHS2-E27-3R          | 5'-CTTCCACTCTGCCAATCAAC-3'     |     |
| DCHS2-E27-4F          | 5'-GTGGTCTGGGTGGATATTGA-3'     | 536 |
| DCHS2-E27-4R          | 5'-GTCACTCTCAAGTCCGCATC-3'     |     |
| DCHS2-E27-5F          | 5'-TTTCTCCTCTGAAGGAACACC-3'    | 502 |
| DCHS2-E27-5R          | 5'-AGATAGGCAGGAGAGCTGGT-3'     |     |
| DCHS2-E27-6F          | 5'-GCATCCCTACAGAAAGTGCT-3'     | 500 |
| DCHS2-E27-6R          | 5'-GGGGTGGAAAAACAAAAGAT-3'     |     |
| DCHS2-E27-7F          | 5'-GGTGTGCAGCTCTTTCAACT-3'     | 519 |
| DCHS2-E27-7R          | 5'-ATTCATGACCAATGGTGAGC-3'     |     |
| KCNJ2+E0-1F           | 5'-CTGTTTTCCAAAGCAGAAGC-3'     | 499 |
| KCNJ2+E0-1R           | 5'-CATCCGTGACACATCTGAAA-3'     |     |
| KCNJ2+E0-2F           | 5'-TTCATCAATGTGGGTGAGAA-3'     | 494 |
| KCNJ2+E0-2R           | 5'-AAGTGGCTTTTCCGAAGATT-3'     |     |
| KCNJ2+E0-3F           | 5'-GCCAAAGAAGAGAAACGAGA-3'     | 500 |
| KCNJ2+E0-3R           | 5'-TGGGGACTTCGTAAGTTTTG-3'     |     |
| KCNJ2+E0-4F           | 5'-CATTGACAACGCAGACTTTG-3'     | 496 |
| KCNJ2+E0-4R           | 5'-TAACTGTTTTGGGCCTCTGA-3'     |     |
| CTD-2378E21.1-E2-1F   | 5'-CAATGGATGAGGATGAGAGG-3'     | 503 |
| CTD-2378E21.1-E2-1R   | 5'-AGCTCCGAAAGAAACAGTCA-3'     |     |
| CTD-2378E21.1-E2-2F   | 5'-AAACATTATGAGCCGCATTC-3'     | 491 |
| CTD-2378E21.1-E2-2R   | 5'-TCTCTTTGCTCCCATCATTC-3'     |     |
| CTD-2378E21.1-E1F     | 5'-AGTTGGGCTAATCAATGCTG-3'     | 503 |
| CTD-2378E21.1-E1R     | 5'-TAATGCCTTGCTCCTTG TTC-3'    |     |
| CTD-2378E21.1-E0F     | 5'-GAGAACCAGGAGCTCTGACA-3'     | 504 |
| CTD-2378E21.1-E0R     | 5'-CACCATCCAATTCTTTGAGG-3'     |     |
| KCNJ2 real-time PCR F | 5'-GCAACAGGACATGTTCTCTGGAT-3'  | 151 |
| KCNJ2 real-time PCR R | 5'-CAGTTTTGAATGTTCGGTGAAGAC-3' |     |

F, forward primer; R, reverse primer; bp, base pairs.

0  
1

2 **eFigure 1 The flowchart for quality filtering in the two-stage study for genome-wide**  
 3 **association study.** In the initial genome-wide association study (GWAS) stage, DNA samples from  
 4 158 thyrotoxic periodic paralysis (TPP) cases and 803 controls were genotyped using Illumina  
 5 HumanOmniZhonghua-8 BeadChips (called TPP GWAS section), and those from 17 Graves'  
 6 disease (GD) cases with TPP, 1,519 GD cases without TPP, and 1,516 controls were genotyped  
 7 using Illumina Human660-Quad BeadChips (called GD GWAS section). Quality filtering was  
 8 separately performed on SNPs and samples before analysis to ensure robust association tests for  
 9 the two above-mentioned sections.

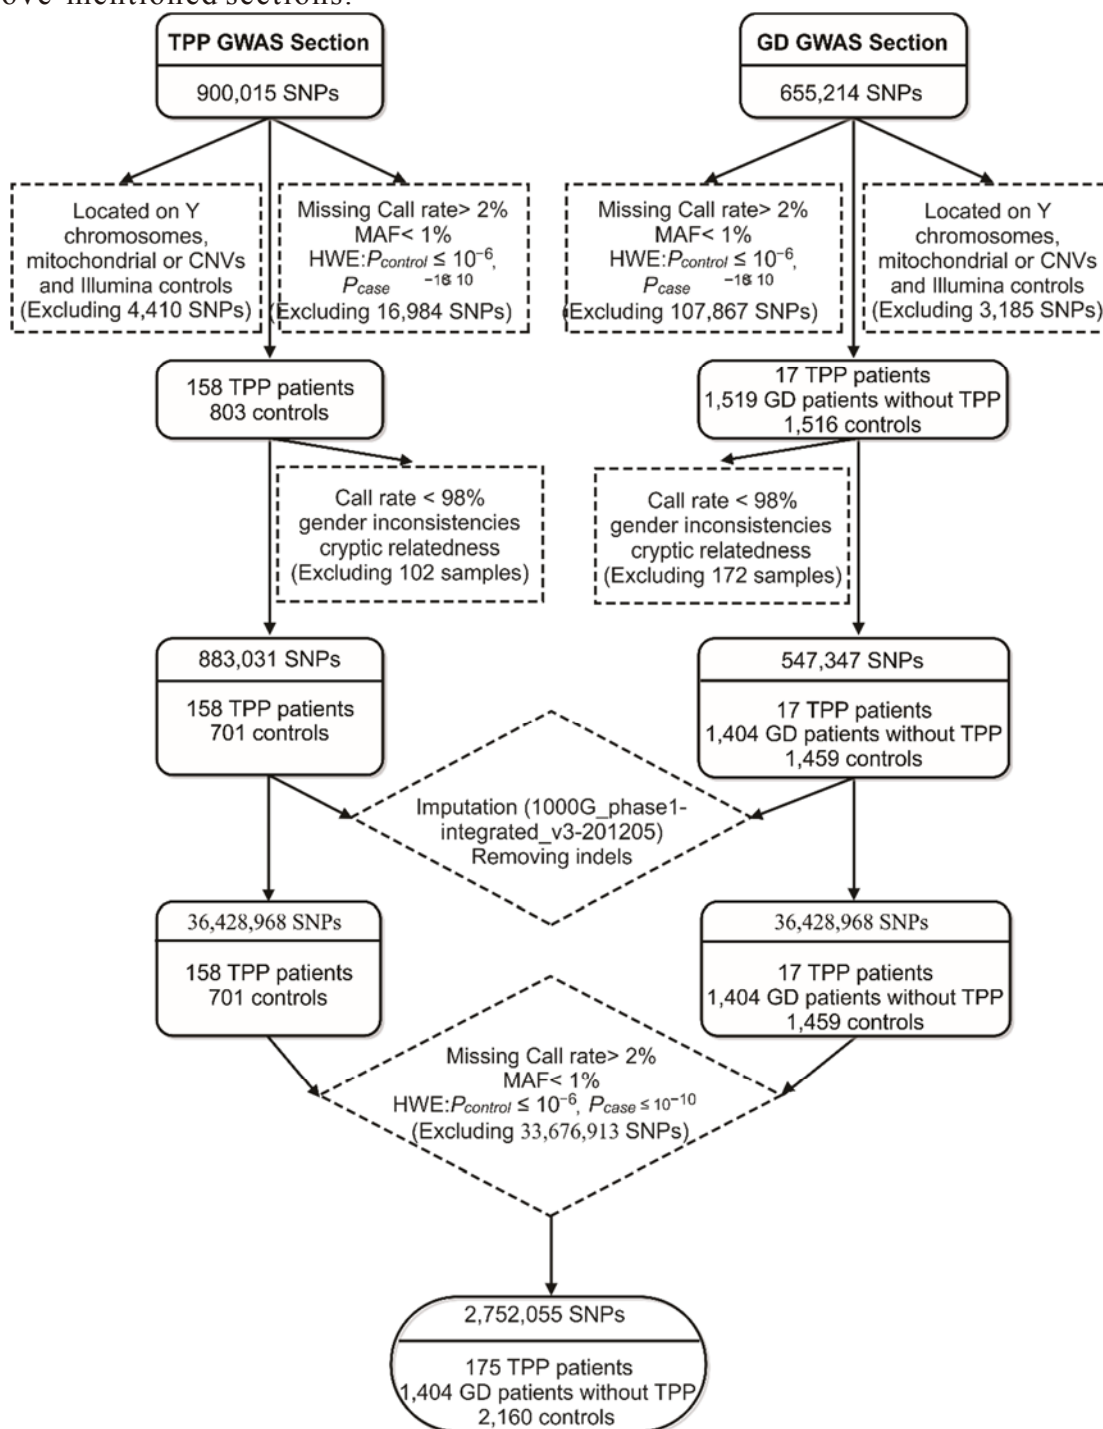

10

11 **eFigure 2 Summary of association results from the genome-wide scan.** Genome-wide association results of  
12 TPP from the initial scan. Manhattan plot shows the genome-wide P values ( $-\log_{10} P$  values) of the Cochran-  
13 Armitage trend test from the SNPs with discovery stage  $P \leq 0.01$  in 175 TPP cases and 2,160 controls (a), and in  
14 175 TPP cases and 1,404 GD cases without TPP (b). Each chromosome is depicted as a different color. The red  
15 and blue horizontal line represents  $P=5 \times 10^{-8}$  and  $P=1 \times 10^{-4}$ .

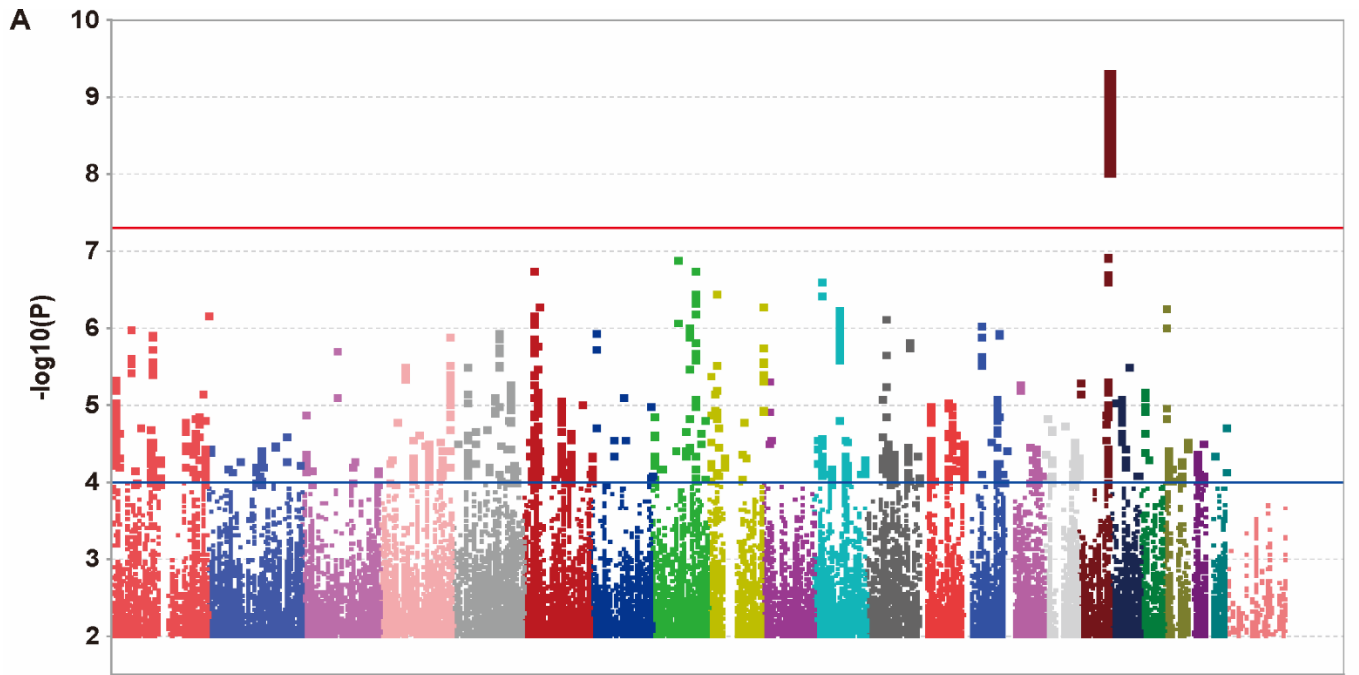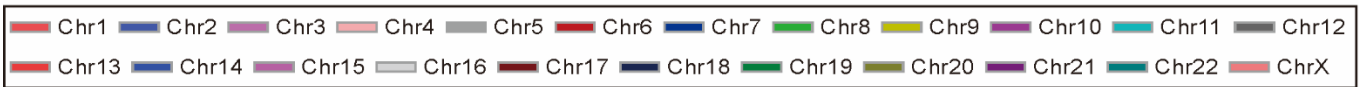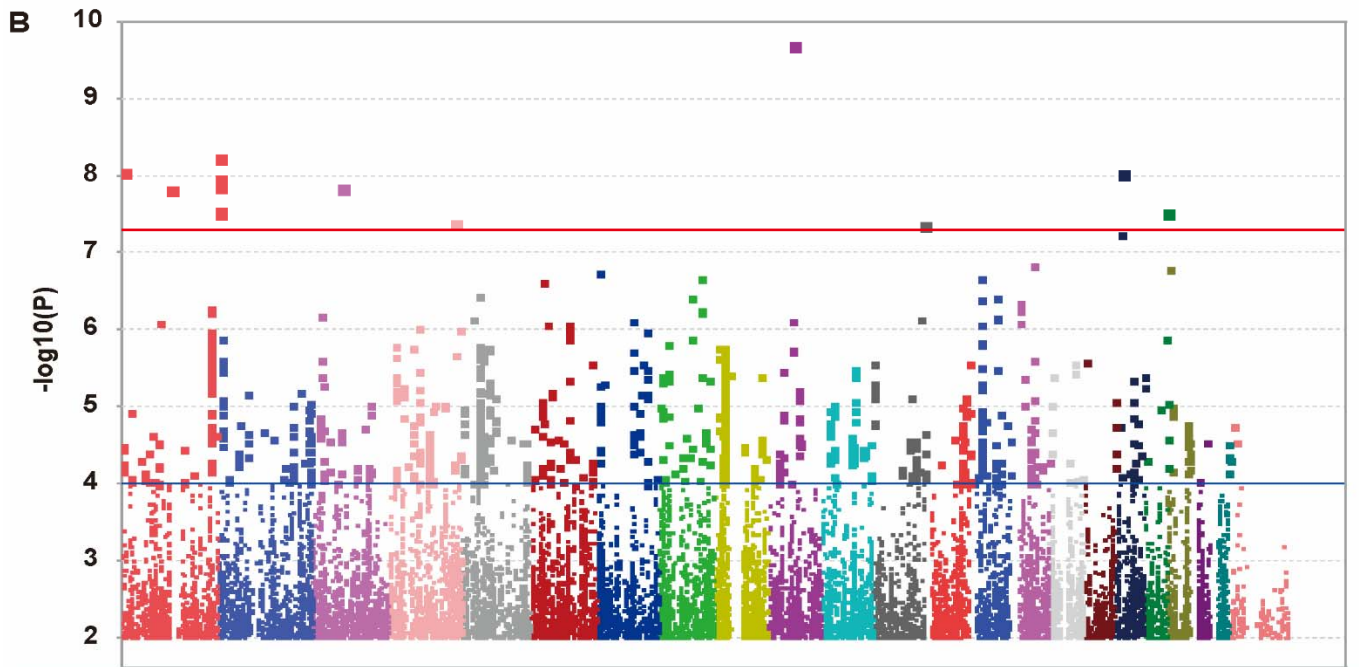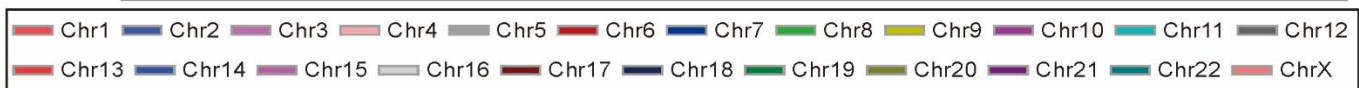

16

17 **eFigure 3 Plots of principal component analysis (PCA) and multidimensional scaling (MDS) analysis**  
 18 **in our cohorts and the HapMap samples.** a, Case-control cohorts (175 TPP cases and 2,160 controls) and  
 19 270 individuals from HapMap data were plotted using the first two eigenvectors produced by the  
 20 EIGENSOFT software package. b, Case-control cohorts, and the 270 HapMap samples were plotted by  
 21 their first and second dimension values. MDS analysis was done using the PLINK1 ([http://](http://pnu.mgh.harvard.edu/purcell/plink/)  
 22 [pnu.mgh.harvard.edu/purcell/plink/](http://pnu.mgh.harvard.edu/purcell/plink/)) and R statistics packages (<http://r-project.org>). The identity-by-  
 23 descent (IBD) pairwise distances among all the case-control cohorts and HapMap groups were  
 24 used to construct dimensions. In both A and B, individuals who were TPP cases, controls,  
 25 Chinese (CHB), Japanese (JPT), Caucasian (CEU), and Yoruban (YRI) groups were plotted in  
 26 red circle, blue diamond, purple triangle point up, orange triangle point down, green cross, and  
 27 black plus, respectively. The insets shown in the boxes on panel A and B were the magnification  
 28 of the current cohort, CHB and JPT population, suggesting the current cohorts clearly cluster  
 29 together with CHB and JPT components of the HapMap. No significant structures were observed  
 30 in our current cohorts.

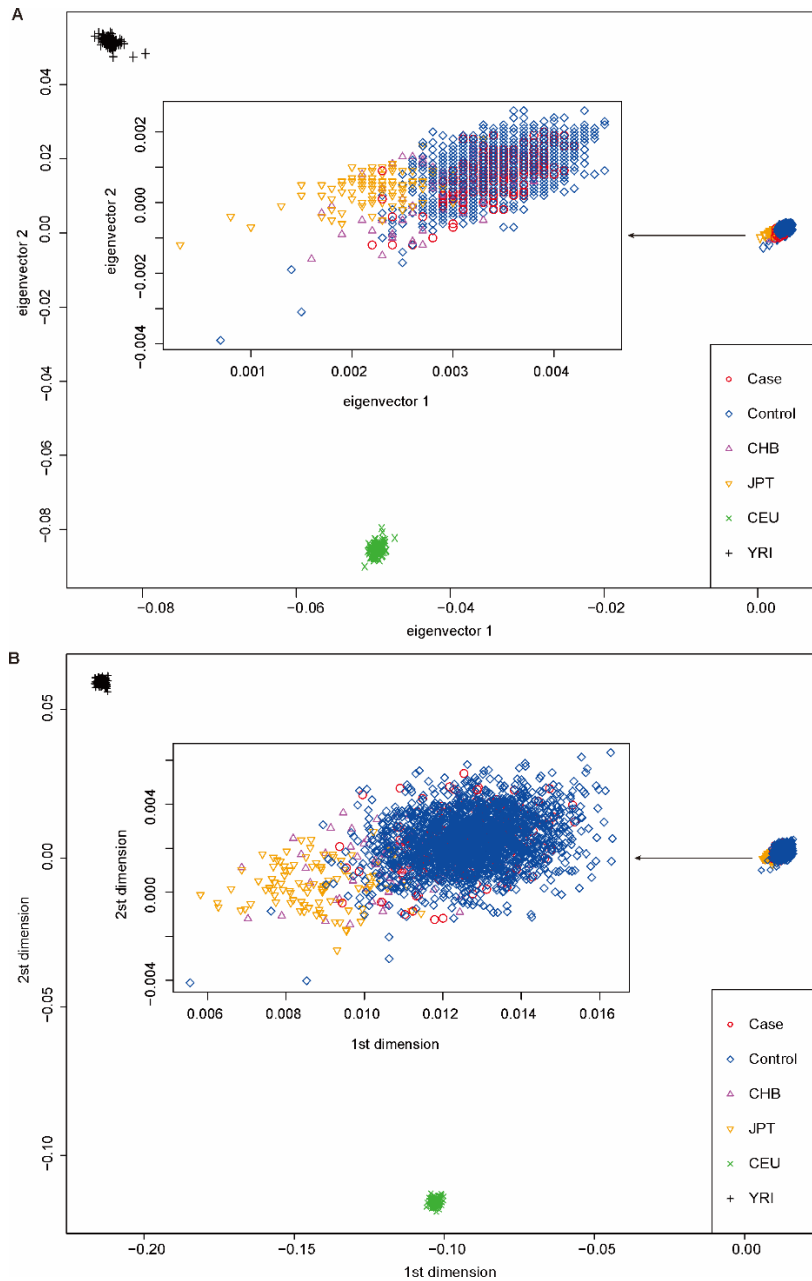

31

32 **eFigure 4 Quantile-quantile plot for detection of population stratification** Quantile-quantile  
 33 plot is shown for comparing the genome-wide distribution of the test statistic with the expected  
 34 null distribution in 175 TPP cases compared to 2,160 control subjects. Since  $\lambda$  represents the  
 35 genomic inflation factor and scales with sample sizes, we rescaled and adjusted the  $\lambda$  based on  
 36 the samples size of 1000 cases and 1000 controls and the  $\lambda$  value was 0.9998.

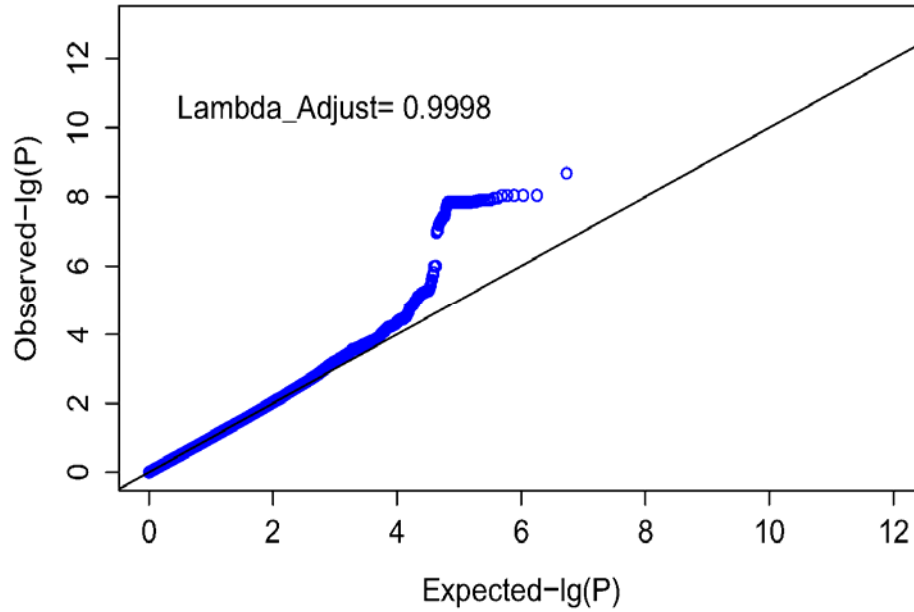

37

38 **eFigure 5 The flowchart for SNPs selection of the second stage study.**

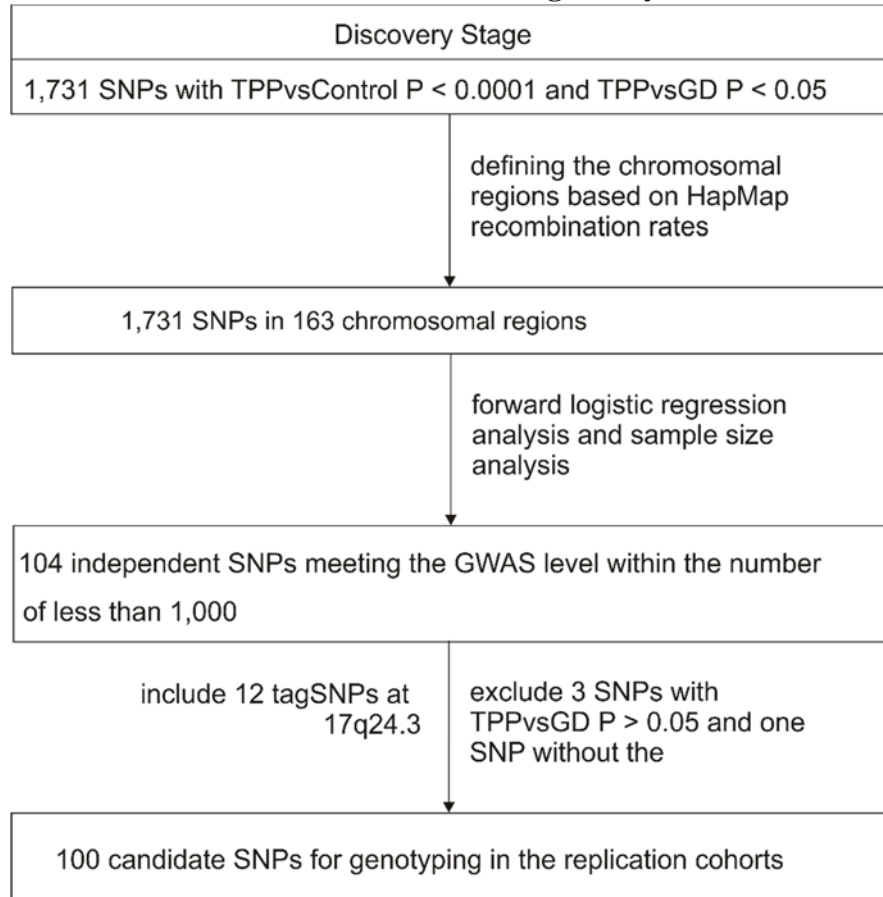

39

40



41 **eFigure 6 The logistic regression results and linkage disequilibrium block analysis at 4q31.3 (A)**  
 42 The two-locus conditional logistic regression results accounting for rs1352714 from the GWAS  
 43 scan. The SNPs at 4q31.3 were improved by adding rs1352714 were shown in red points; whileas,  
 44 the SNPs improved the model with rs1352714 were showed in blue triangles. The results showed  
 45 that no other SNPs at 4q31.3 was independently associated with TPP after accounting for  
 46 rs1352714. (B) The linkage disequilibrium block analysis for the 28 SNPs with discovery stage  $P <$   
 47 0.01, which can be tagged by three replicated SNPs in the combined population by using haploview  
 48 software 42.

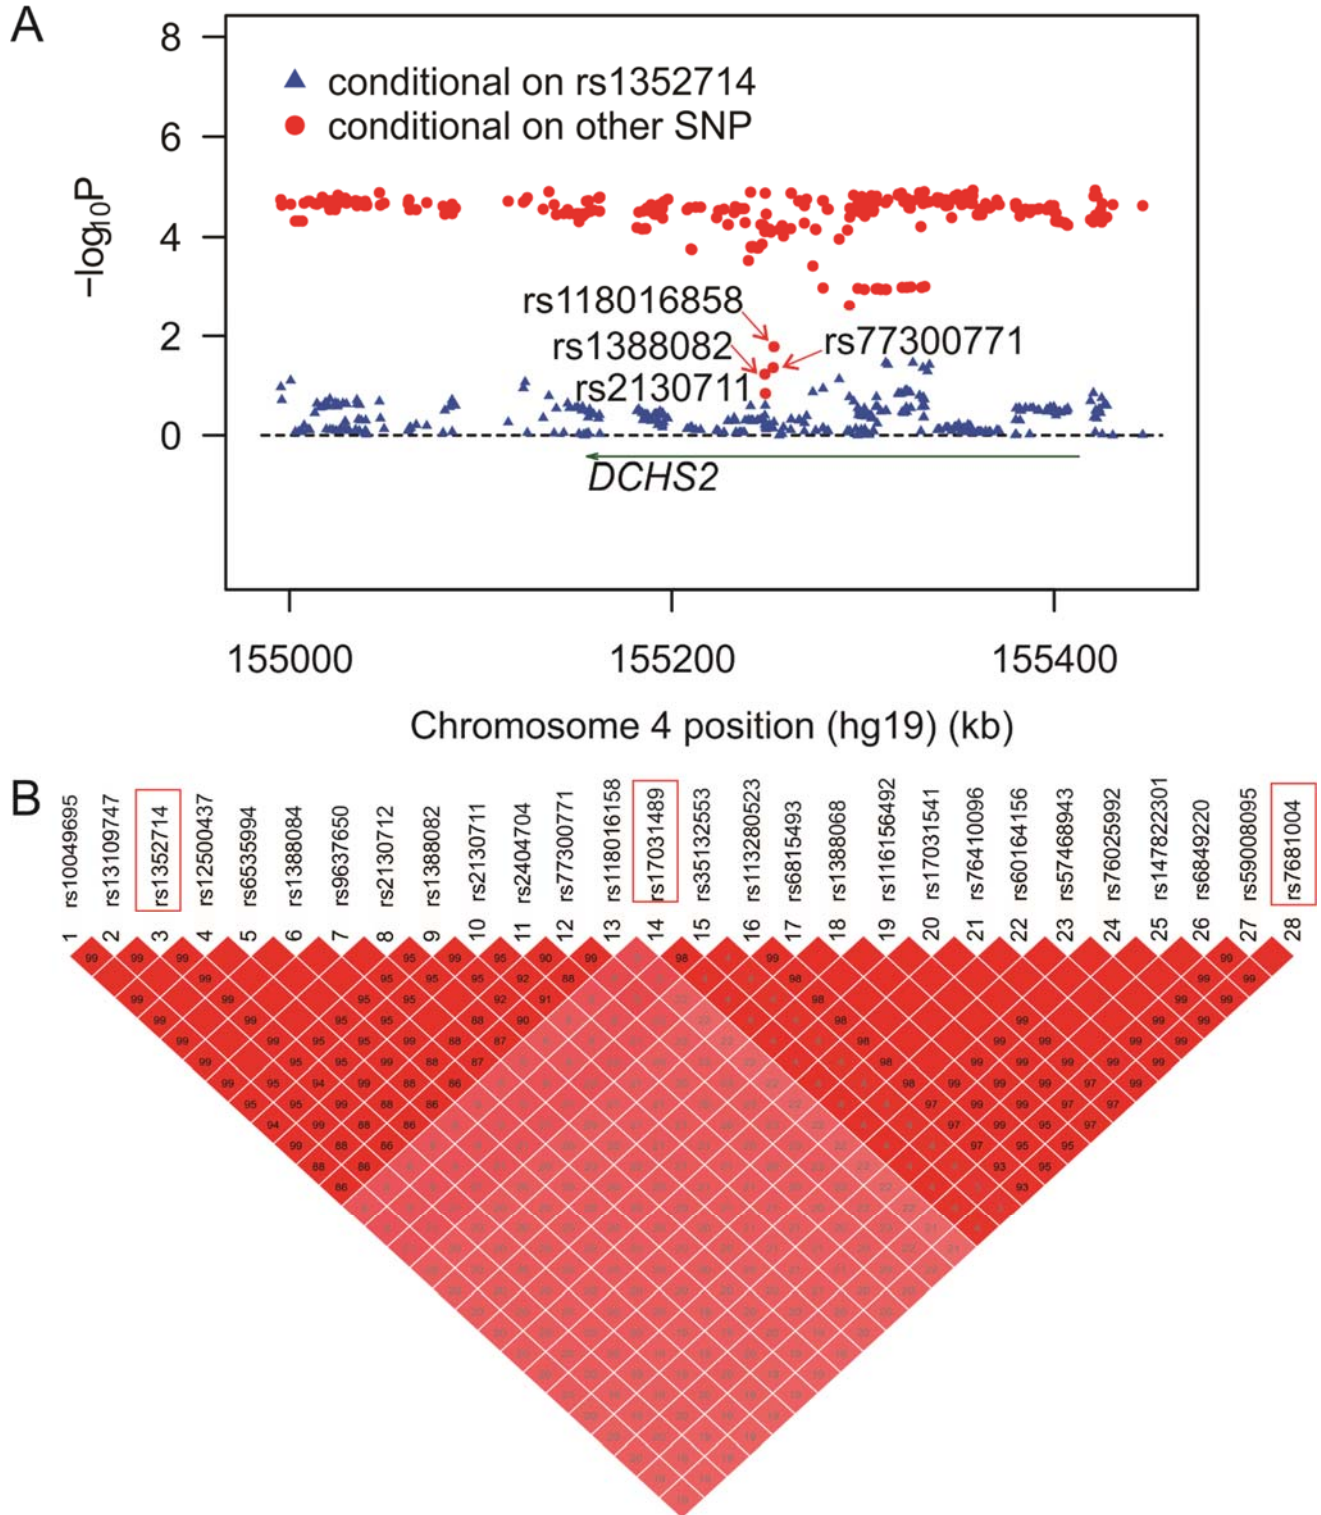

49

50 **eFigure 7 The cis-eQTL analyses results at 11q14.1** (A, C, E) The plots of the cis-eQTL analyses results of  
 51 128, 22, and 260 SNPs with discovery stage  $P < 0.05$  at 11q14.1 and with the significant cis-eQTLs in purified  
 52 CD4+ T cells from 213 EU healthy individuals, in human naïve monocytes from 432 European volunteers, and  
 53 in human skeletal muscle samples from the GTEx database. The most strongly TPP-associated signal  
 54 (rs2186564) at 11q14.1 is shown in large symbols purple diamonds indicate the TPP association results. (B, D,  
 55 F) The LD structures were analyzed by Haploview software version 4.2 based on the our TPP GWAS data. The  
 56 LD color scheme is stratified according to the logarithm of the odds (LOD) score and  $D'$ :  $LOD < 2$  (white for  
 57  $D' < 1$  and blue for  $D' = 1$ ) or  $LOD > 2$  (shades of pink/red for  $D' < 1$  and bright red for  $D' = 1$ ). Panel B, D, and F  
 58 show the number of SNPs correlated with expression level of genes at 11q14.1 in purified CD4+ T cells, human  
 59 naïve monocytes, and skeletal muscles from GTEx, is 128, 22, and 260, respectively. The most strongly TPP  
 60 associated signal (rs2186564) at 11q14.1 is marked with the red rectangle. TPP = thyrotoxic periodic paralysis;  
 61 eQTL = expression quantitative trait loci.

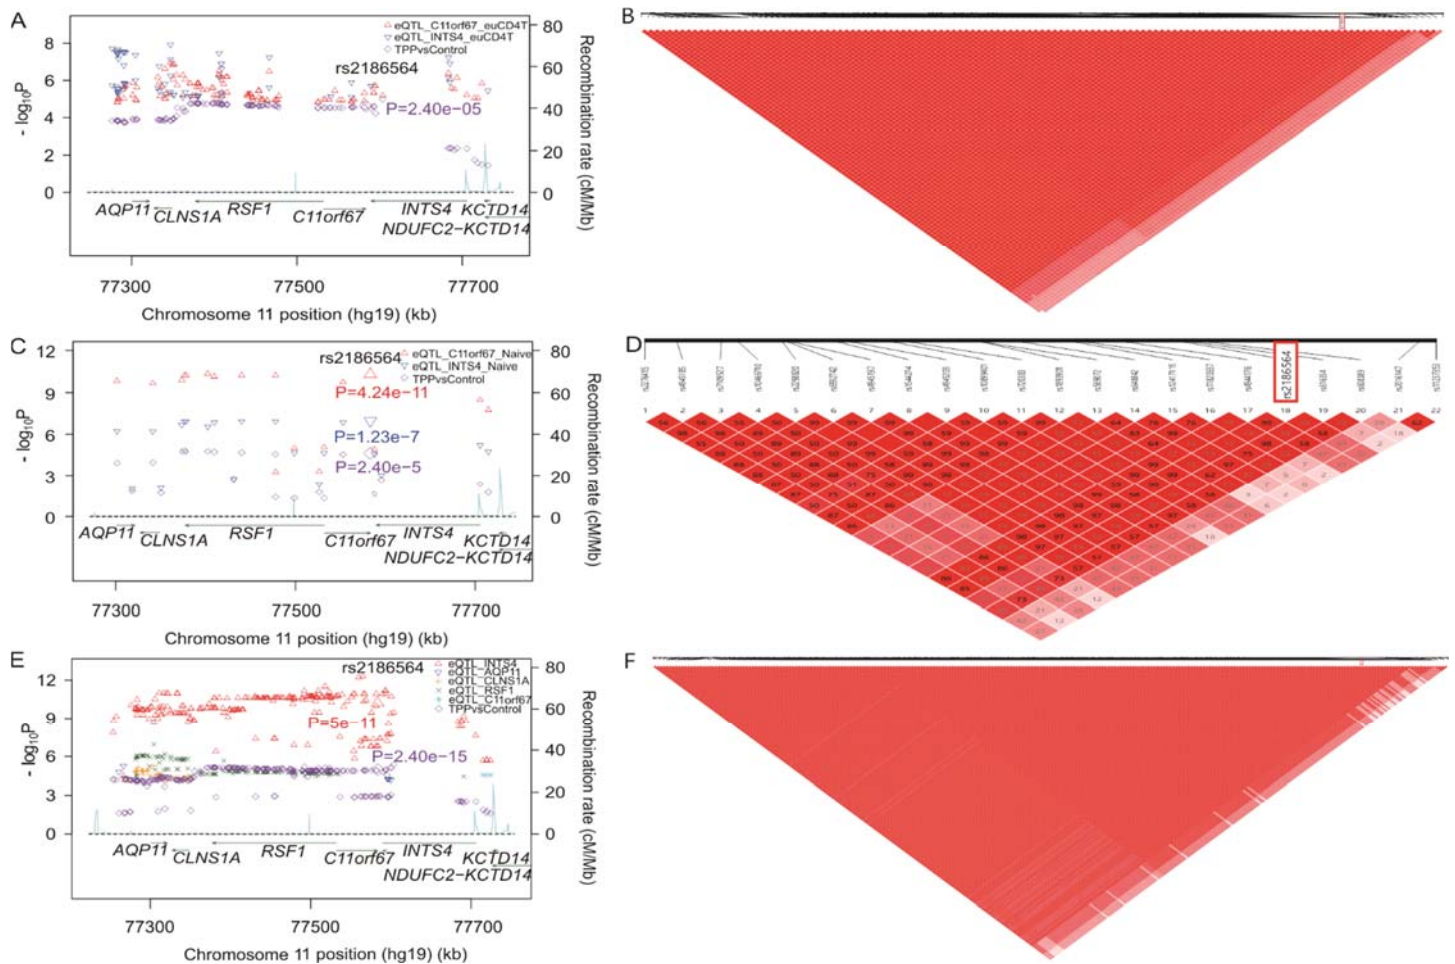

62

63 **eFigure 8 The logistic regression results at 17q24.3.** Panel a shows the the two-locus conditional logistic  
 64 regression results at 17q24.3 accounting for rs312691 from the GWAS scan. The SNPs at 17q24.3 were  
 65 improved by adding rs312691 were shown in red points; whileas, the SNPs improved the model with rs312691  
 66 were showed in blue triangles. Panel b shows the 52 SNPs highly linked with rs312691, the top SNP at 17q24.3.  
 67 The linkage disequilibrium block analysis for the 52 SNPs which are highly linked with rs312691 are shown  
 68 using haploview software 4.2. Conditional on each of the 52 SNPs, rs312691 (the top SNP at 17q24.3), was  
 69 never associated with TPP. Panel c shows the association and stepwise logistic regression results for 12 SNPs at  
 70 17q24.3 in the combined population. Two independent SNPs (rs312691 and rs7222503) and their association P  
 71 values in the combined populations are shown in red filled diamonds. The association results for 12 SNPs using

72 the Cochran-Mantel-Hanezel (CMH) stratification analysis are shown in red triangle point up. The P values of  
 73 the stepwise logistic regression of each of 11 other SNPs after accounting for rs312691 are shown in blue  
 74 triangle point down, and the P values of the stepwise logistic regression of each of 10 other SNPs after  
 75 accounting for rs312691 and rs7222503 are shown in black diamond.

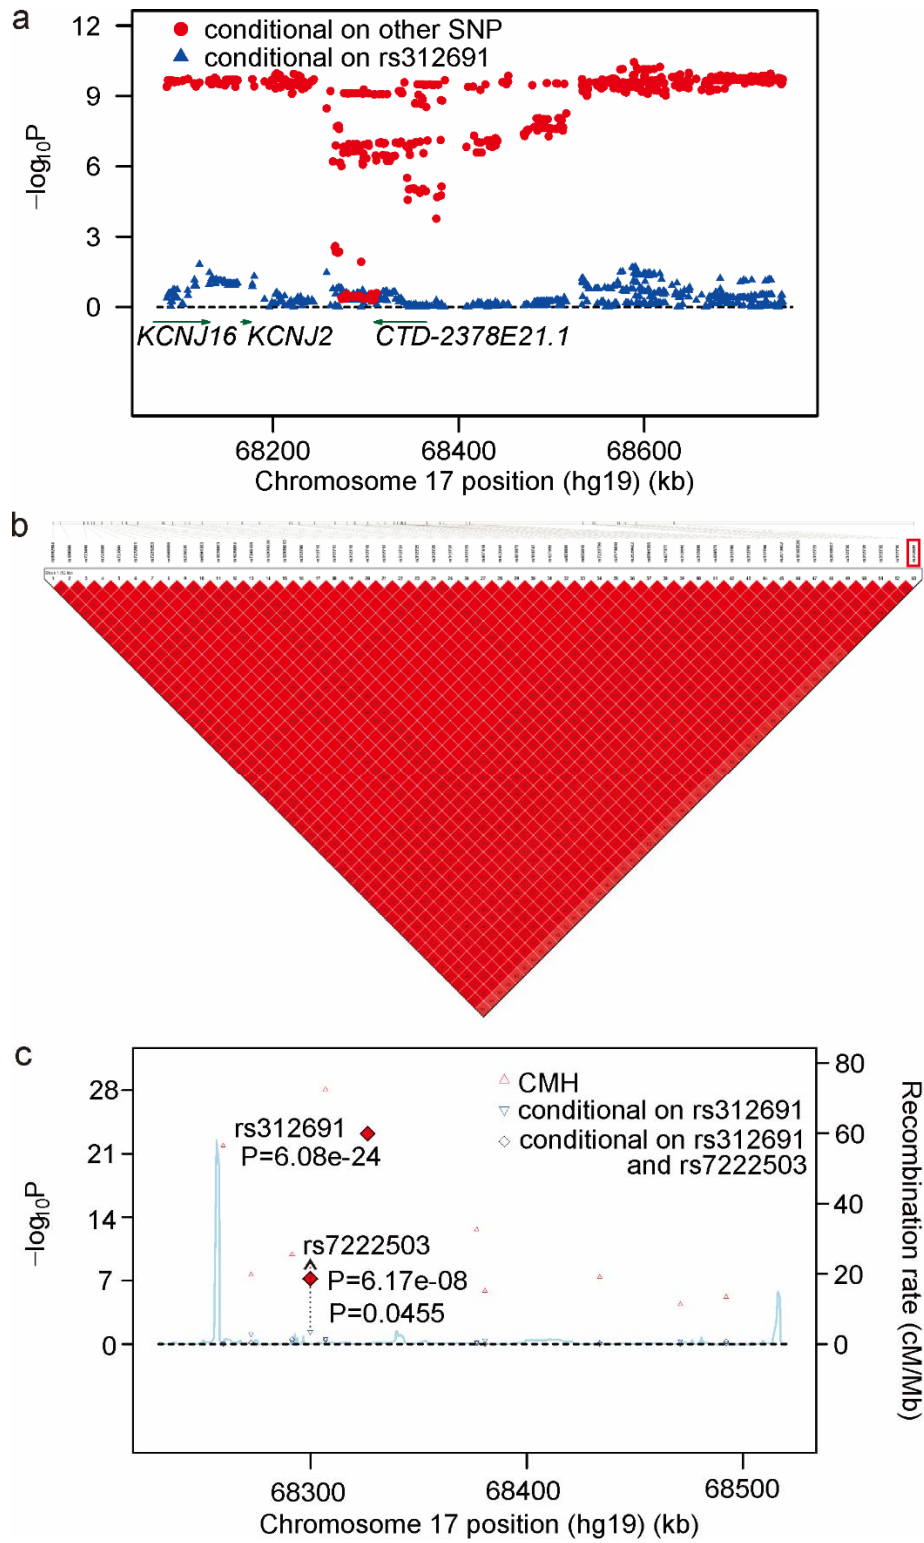

76

77

78

79 **eFigure 9 cis-eQTL analysis and transcript abundances of KCNJ2 at 17q24.3.** Panel a shows  
 80 the linkage disequilibrium (LD) structures at 17q24.3 and correlation of SNPs to transcript  
 81 abundances of KCNJ2 at 17q24.3. There are 78 SNPs with  $P < 0.05$  in the initial GWAS scan of TPP  
 82 and with the significant cis-eQTLs of KCNJ2 expression in the skeletal muscle from GTEx. Red  
 83 triangles point up and purple diamonds indicate the correlation results of 78 SNPs to the expression  
 84 level of KCNJ2 in the skeletal muscles from GTEx and the TPP association results of these 78  
 85 SNPs. And the most strongly associated signals (rs312691) are shown in large red triangle point up  
 86 and large purple diamond, respectively. Panel b shows the cis-eQTL analysis of rs312691 in skeletal  
 87 muscle according to GTEx single tissue eQTL database. The individuals with homogenous  
 88 alternative CC genotype showed the lower expression of KCNJ2 than those with heterogenous CT  
 89 genotype and those with homogenous reference TT genotypes in skeletal muscle tissues ( $P$   
 90  $=1.19 \times 10^{-5}$ ,  $\beta = -0.23$ ). Panel c shows the relative mRNA expression levels of KCNJ2 in the subset of  
 91 PBMCs (N=5). Panel d shows the relative mRNA expression levels of KCNJ2 for different genotypes  
 92 of rs312691 in PBMCs from 188 individuals (TT, N = 45; TC, N = 102; and CC, N = 41).

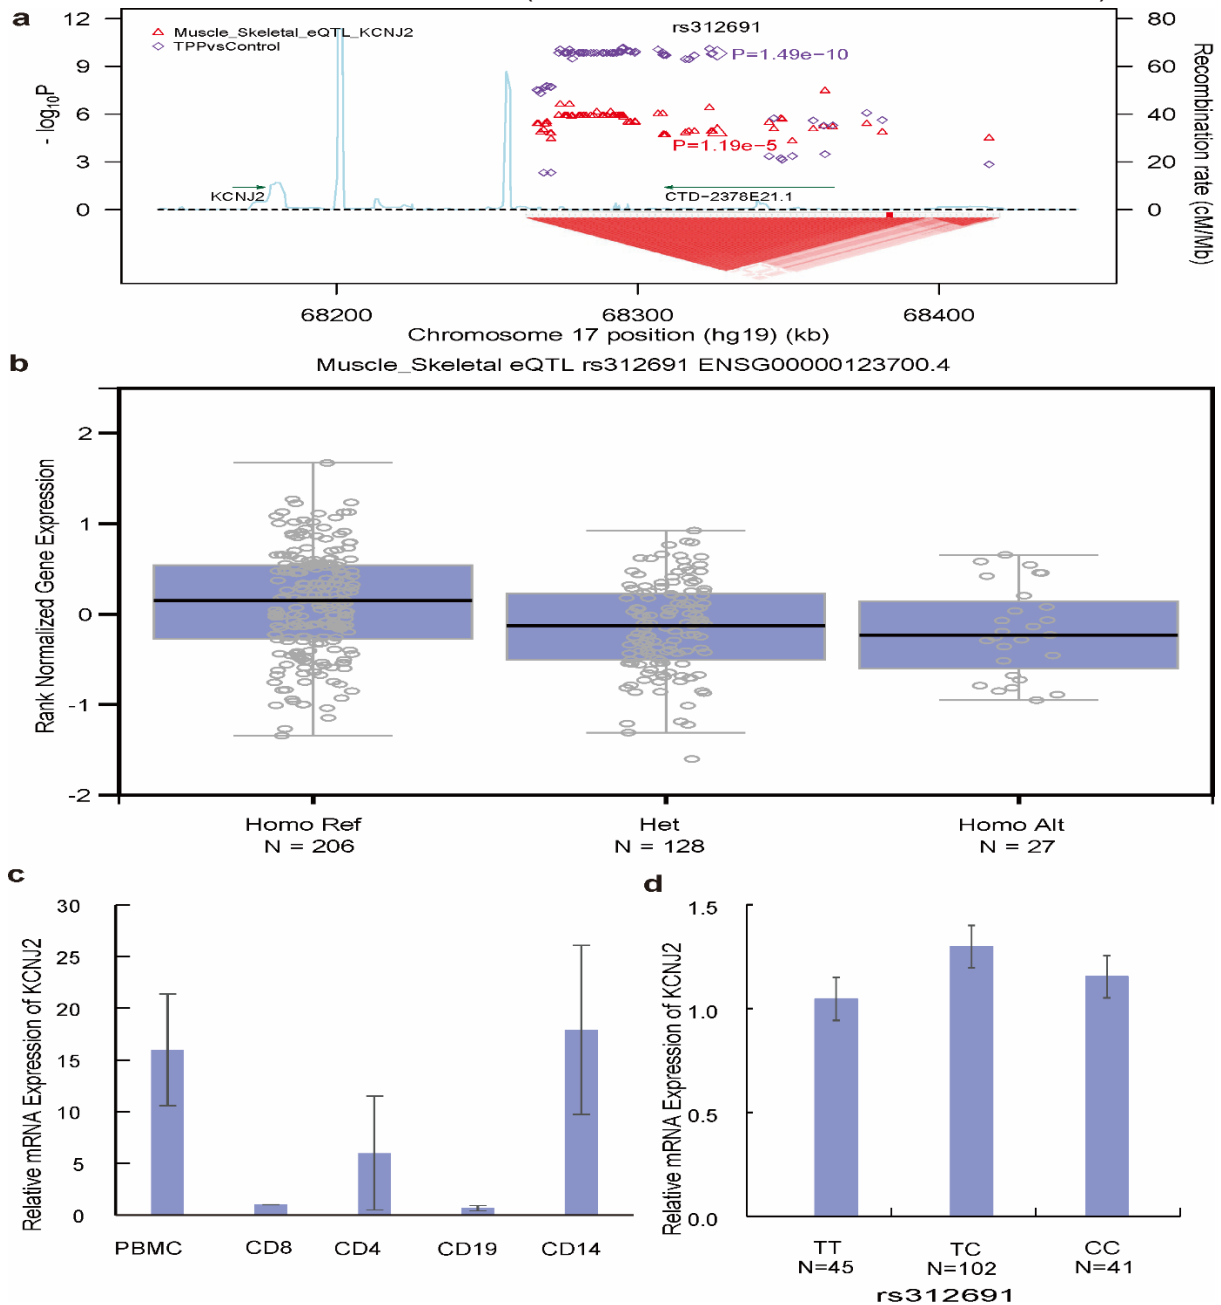

93
